# Supplementary material for: Pd(ii)-Catalyzed regioselective functionalization of antipyrines: synthesis of pyrazolono-maleimides and pyrazolono-quinones
Source: Royal Society of Chemistry journal article supplement (doi:10.1039/d1ob00819f), 2021-01-01

## Supporting Information

### **Pd(II)-Catalyzed Regioselective Functionalization of C–H Bond of Antipyrenes: Synthesis of Pyrazolono-maleimides and Pyrazolono-quinones**

Priya Sonowal, Pratiksha Bhorali, Sabera Sultana, and Sanjib Gogoi\*

Applied Organic Chemistry, Chemical Sciences & Technology Division, CSIR-North East Institute of Science and Technology, Jorhat 785006, AcSIR, Ghaziabad-201002, India. E-mail: skgogoi1@gmail.com; sanjibgogoi@neist.res.in

### Table of Contents

|                                                                                            |                    |
|--------------------------------------------------------------------------------------------|--------------------|
| <b><sup>1</sup>H , <sup>13</sup>C NMR, and HRMS Spectra of Synthesized Compounds .....</b> | <b>2-52, 54-61</b> |
| <b><sup>19</sup>F NMR of compound 3am .....</b>                                            | <b>53</b>          |

# <sup>1</sup>H and <sup>13</sup>C of Compound 3aa (500 & 125 MHz, CDCl<sub>3</sub>):

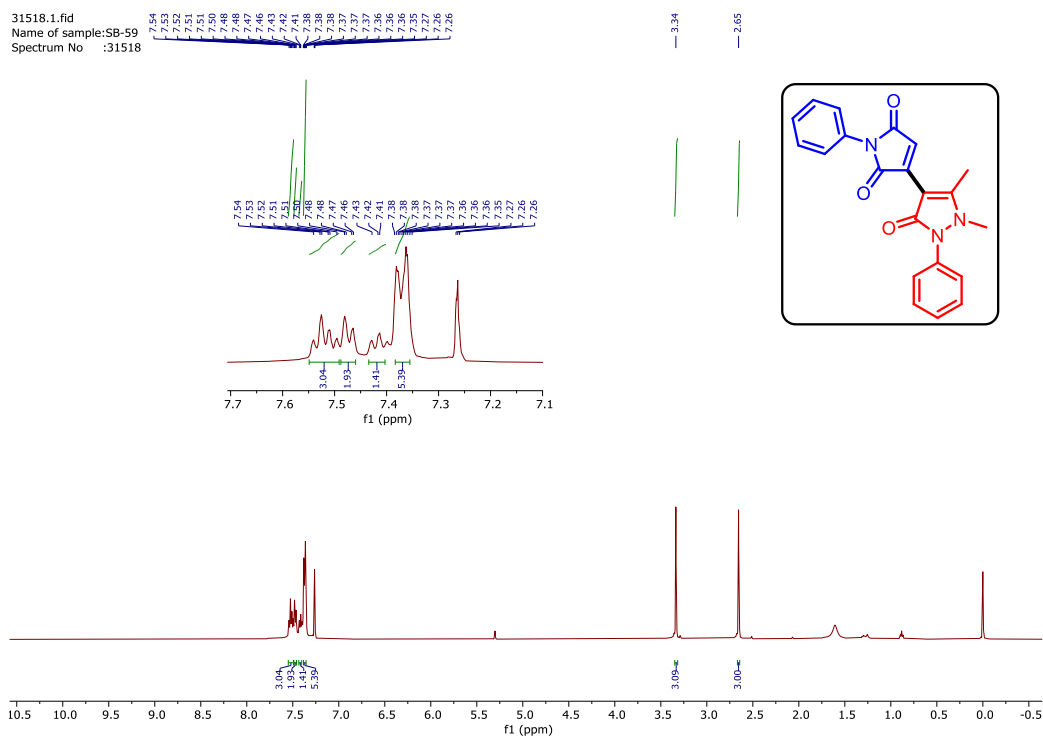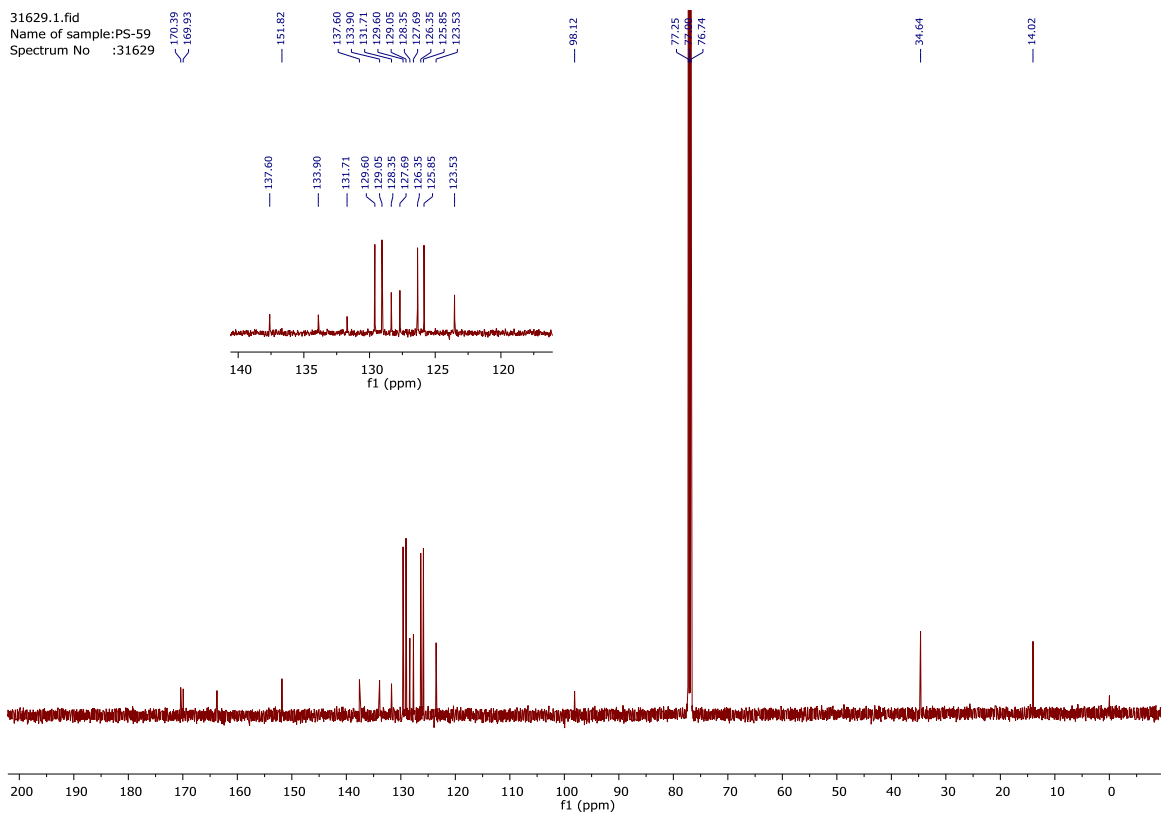

## HRMS Spectra of Compound 3aa:

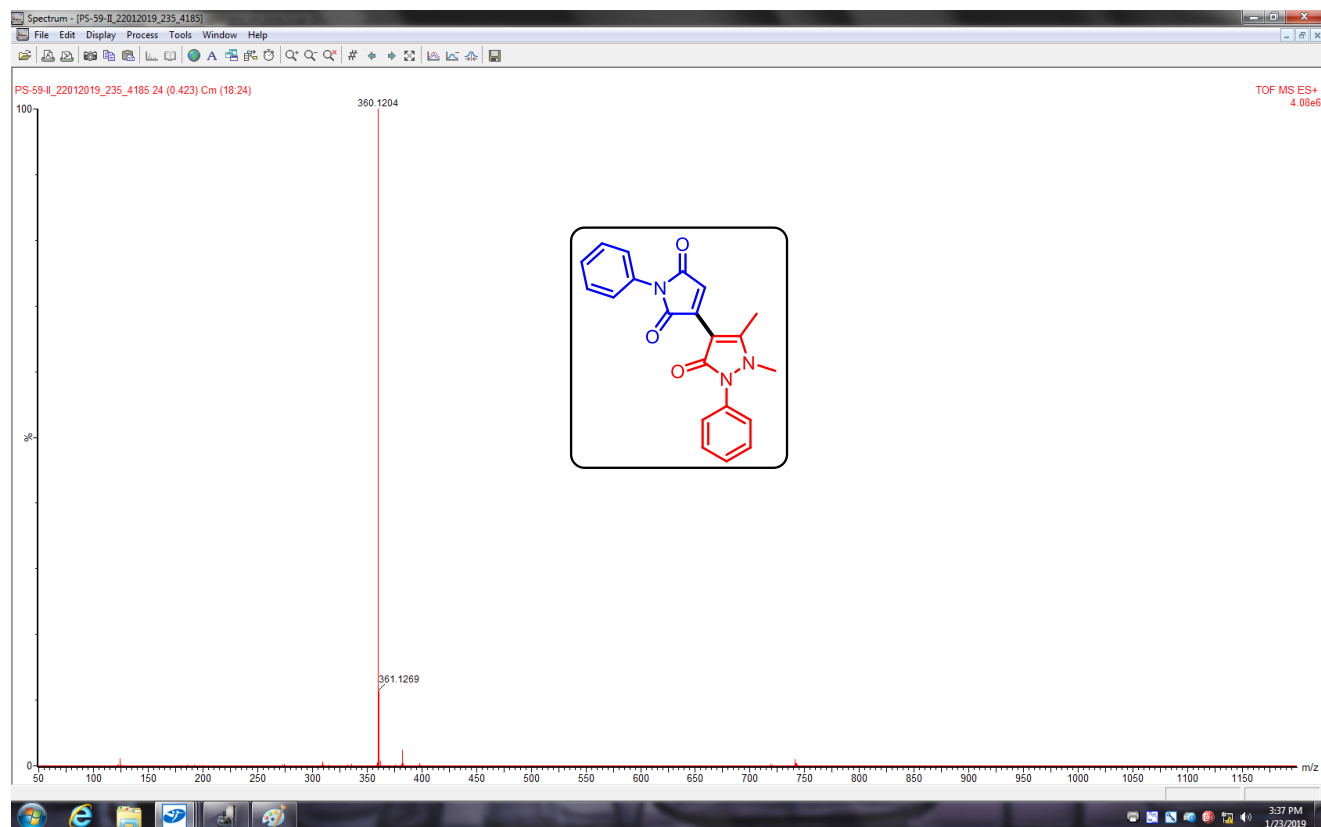

**$^1\text{H}$  and  $^{13}\text{C}$  of Compound 3ba (400 & 100 MHz,  $\text{CDCl}_3$ ):**

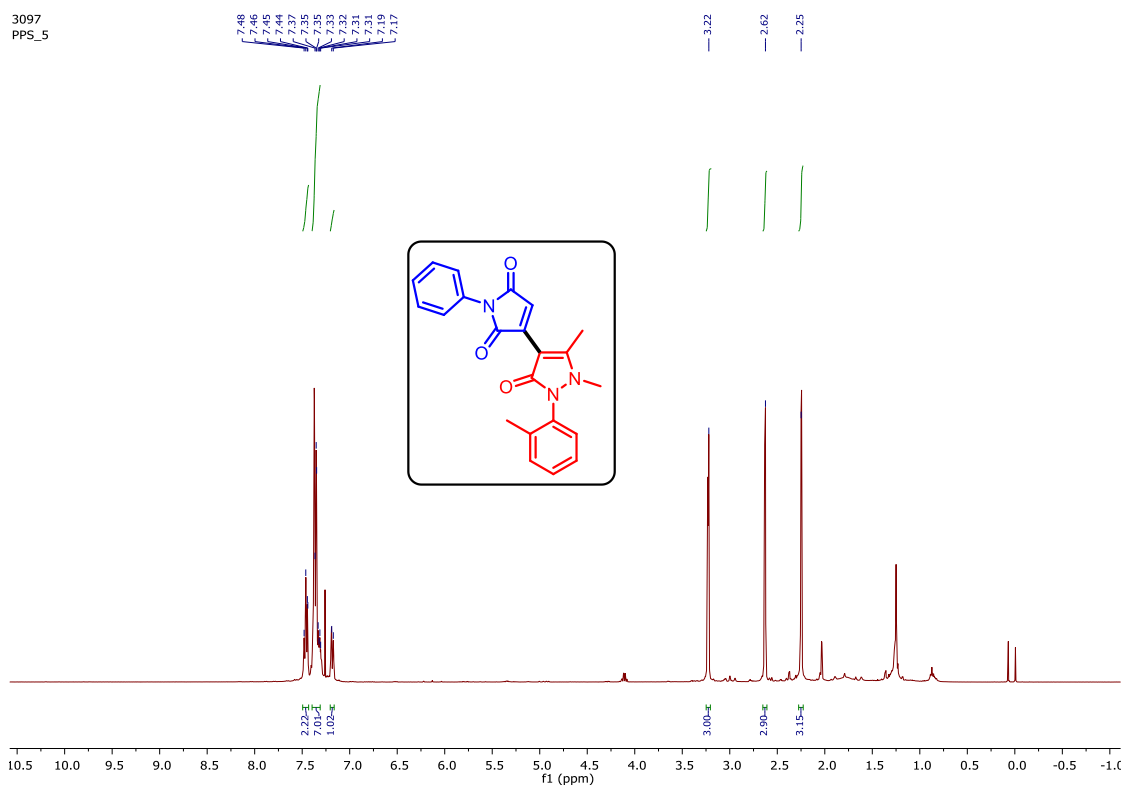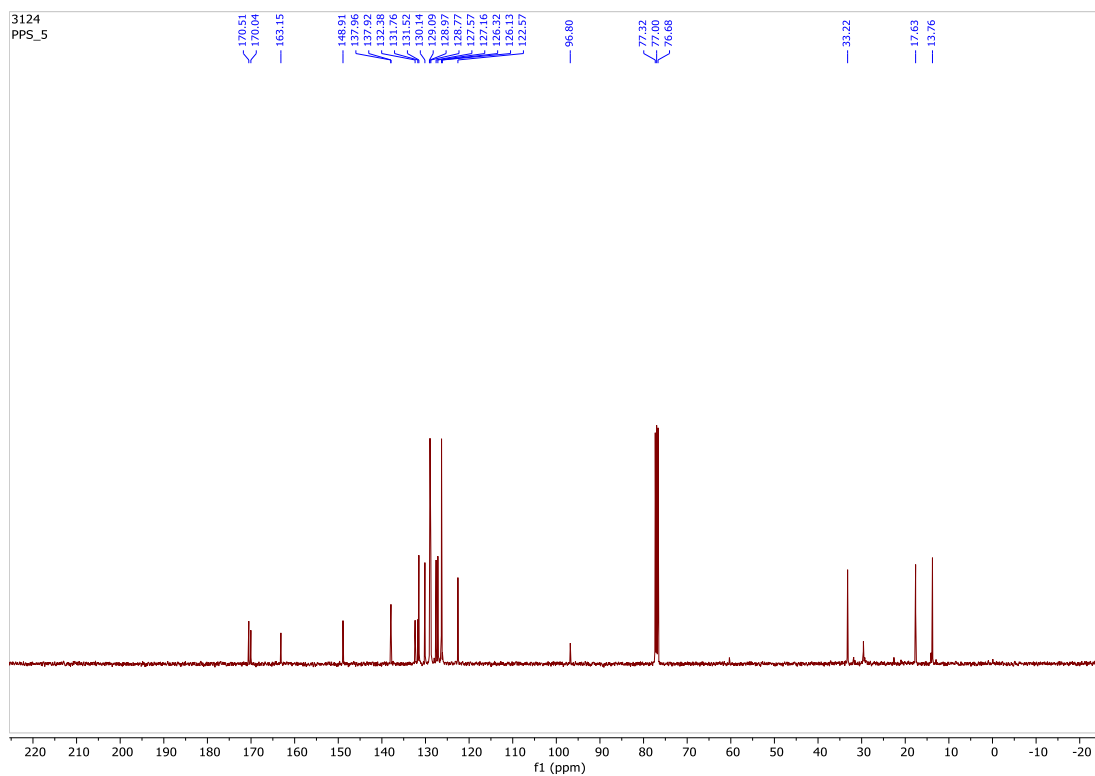



## HRMS Spectra of Compound 3ba:

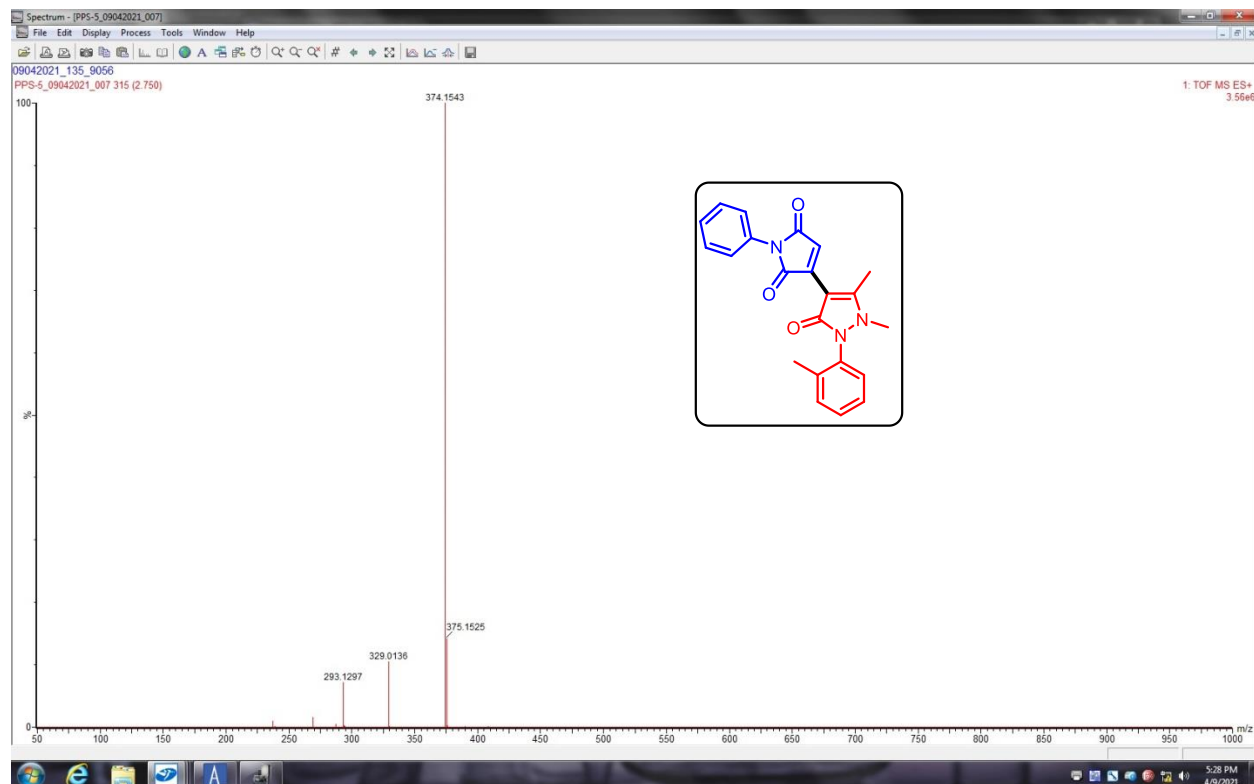

**$^1\text{H}$  and  $^{13}\text{C}$  of Compound 3ca (500 & 125 MHz,  $\text{CDCl}_3$ ):**

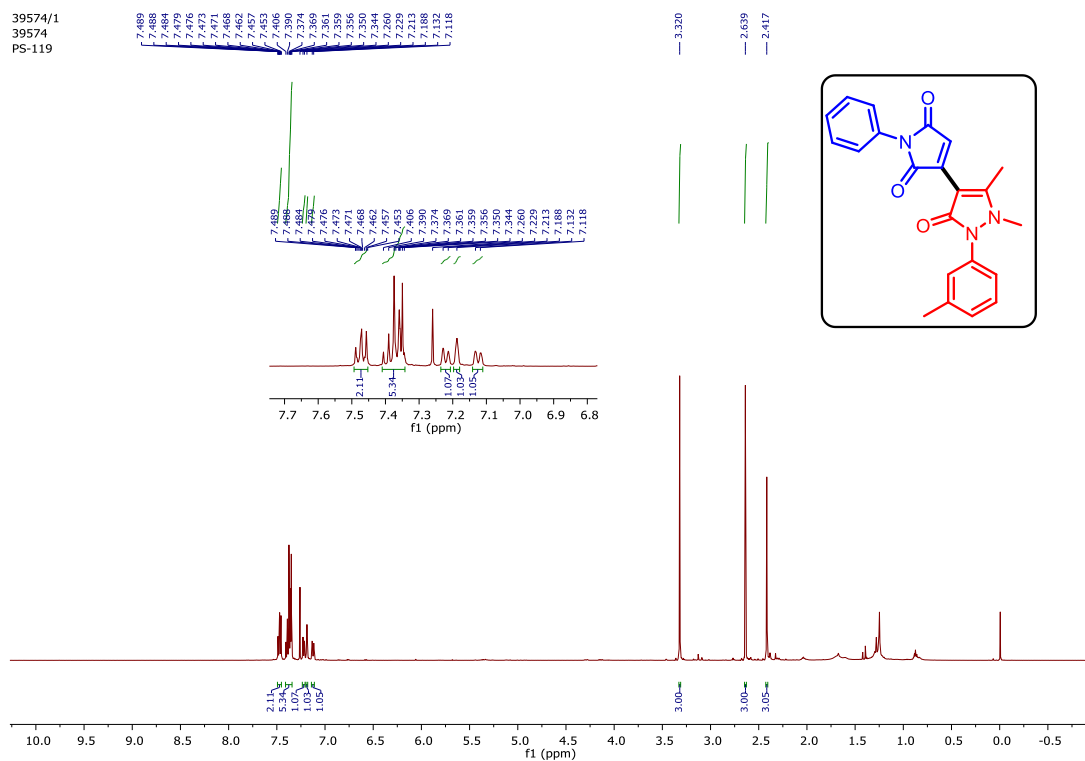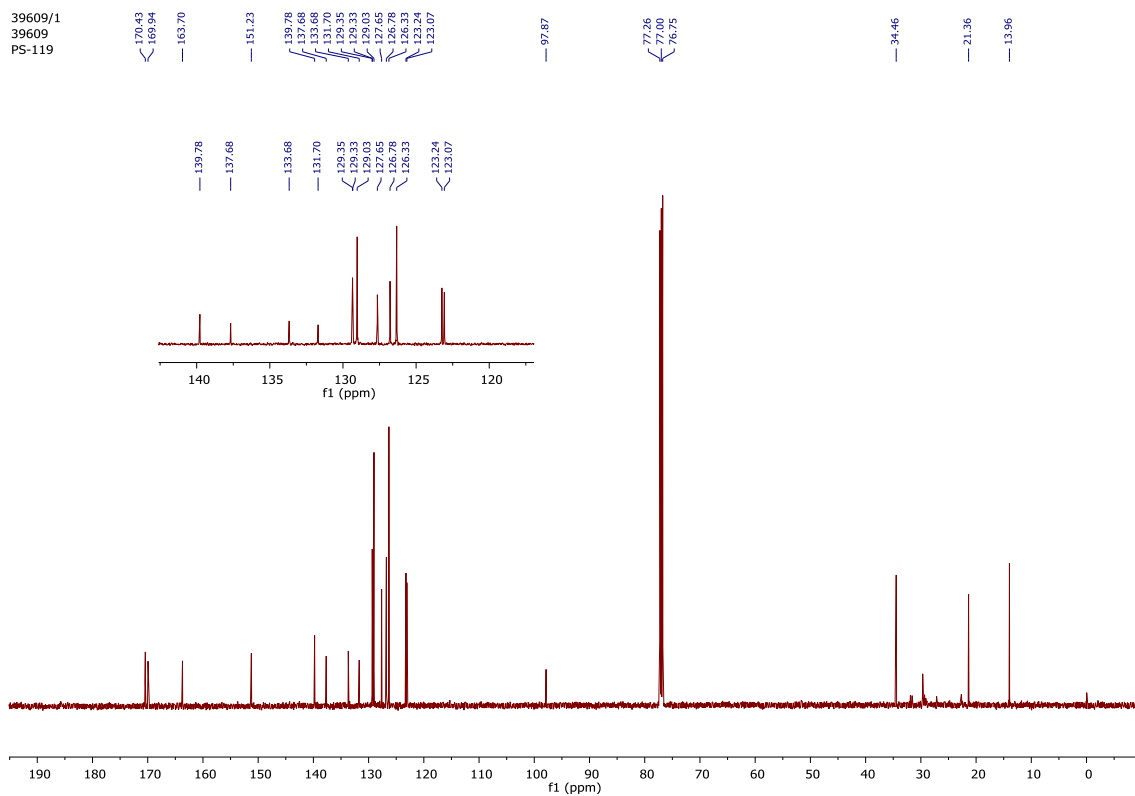

## HRMS Spectra of Compound 3ca:

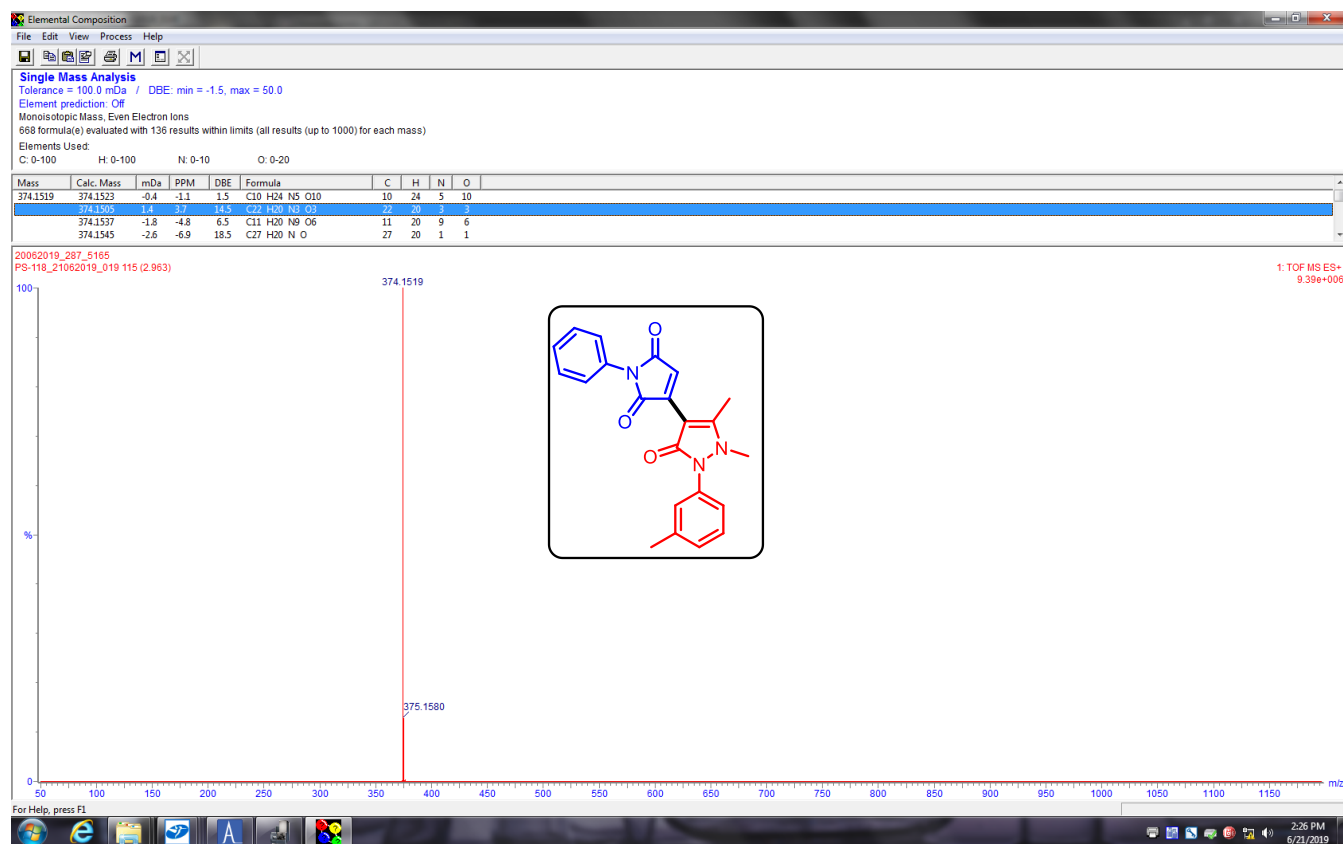

# <sup>1</sup>H and <sup>13</sup>C of Compound 3da (500 & 125 MHz, CDCl<sub>3</sub>):

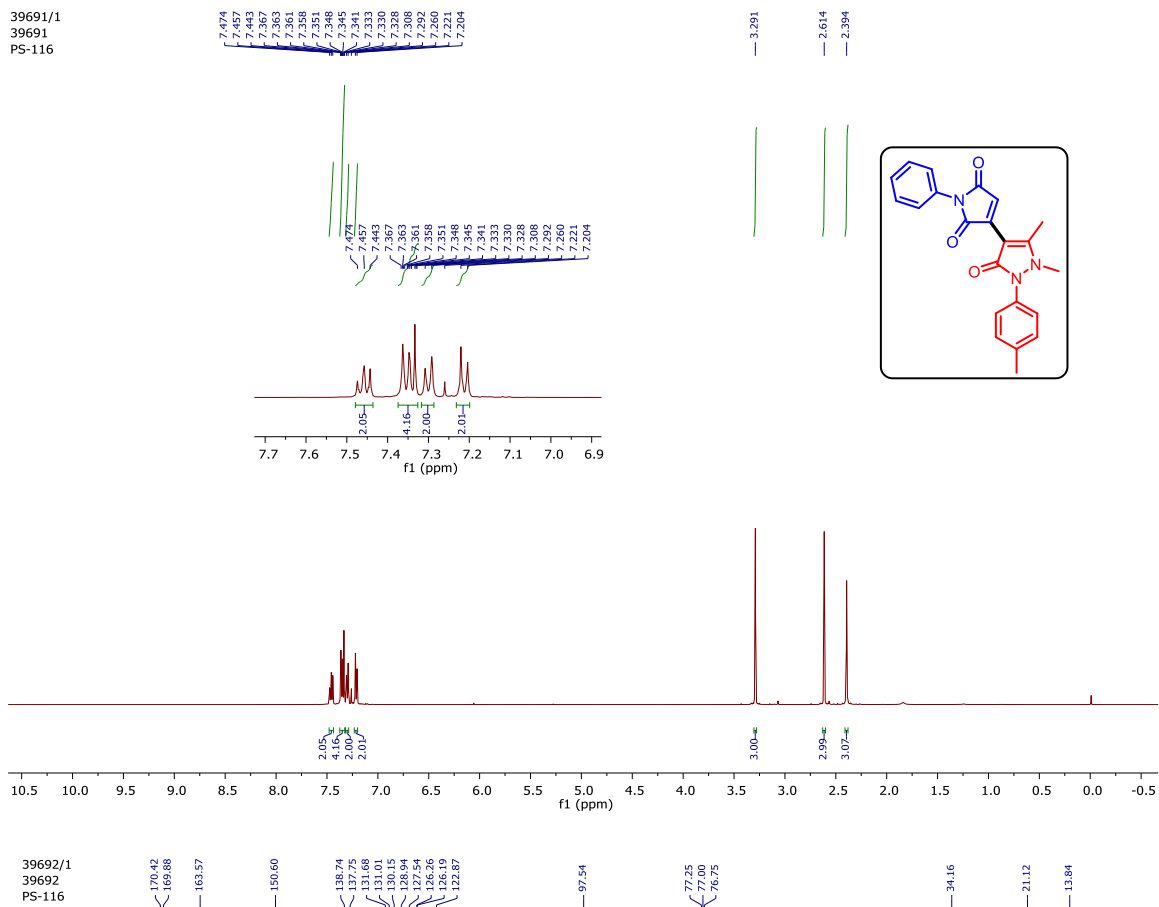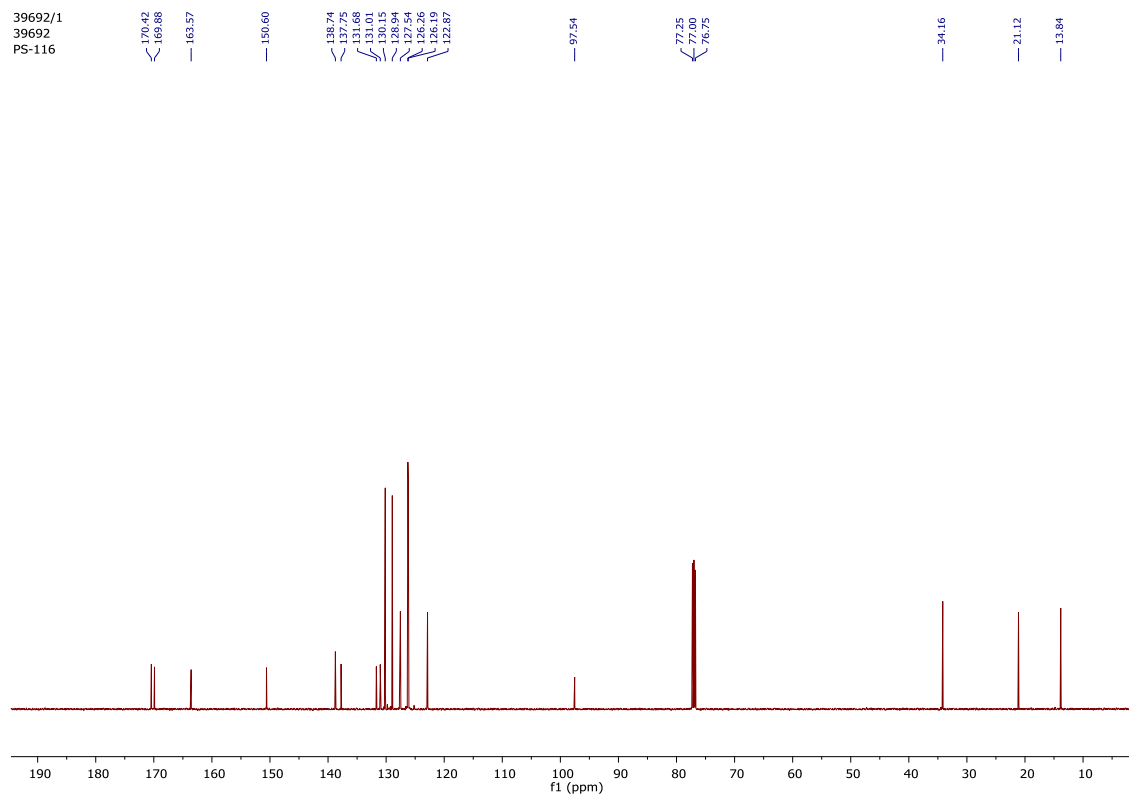

## HRMS Spectra of Compound 3da:

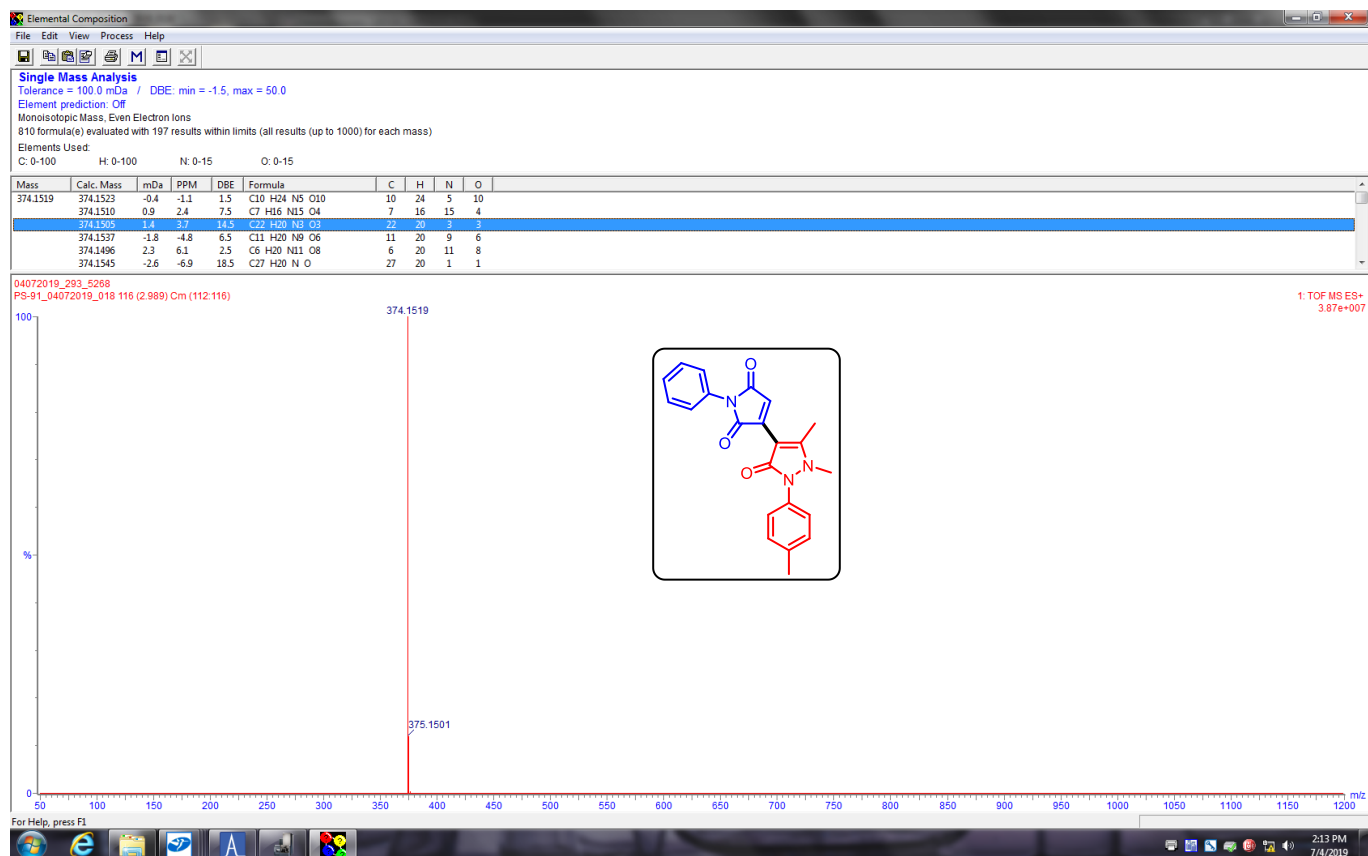

# <sup>1</sup>H and <sup>13</sup>C of Compound 3ea (500 & 125 MHz, CDCl<sub>3</sub>):

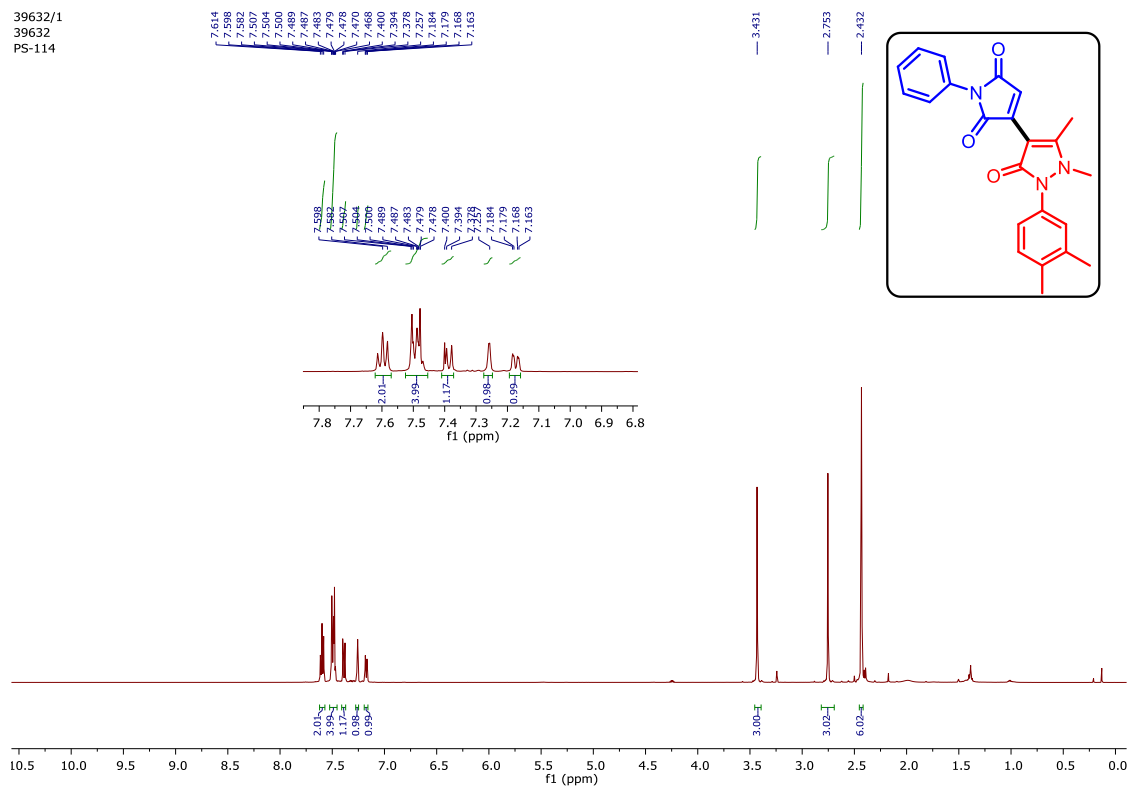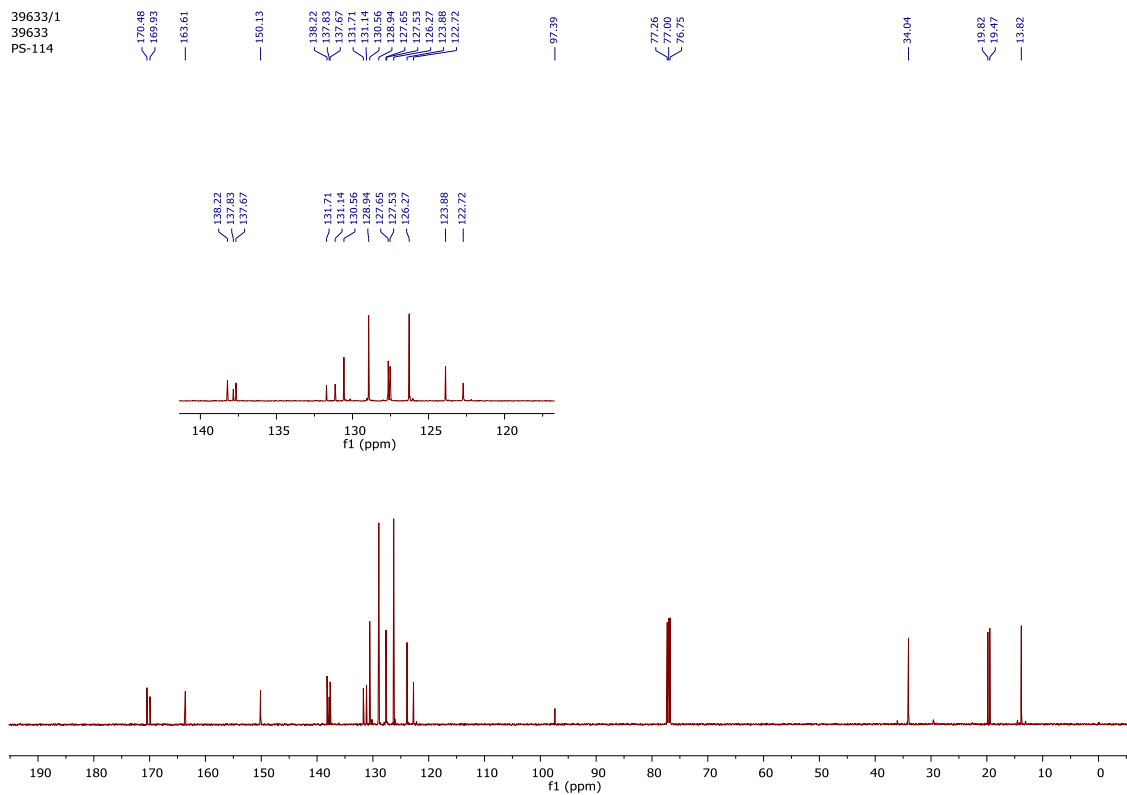

## HRMS Spectra of Compound 3ea:

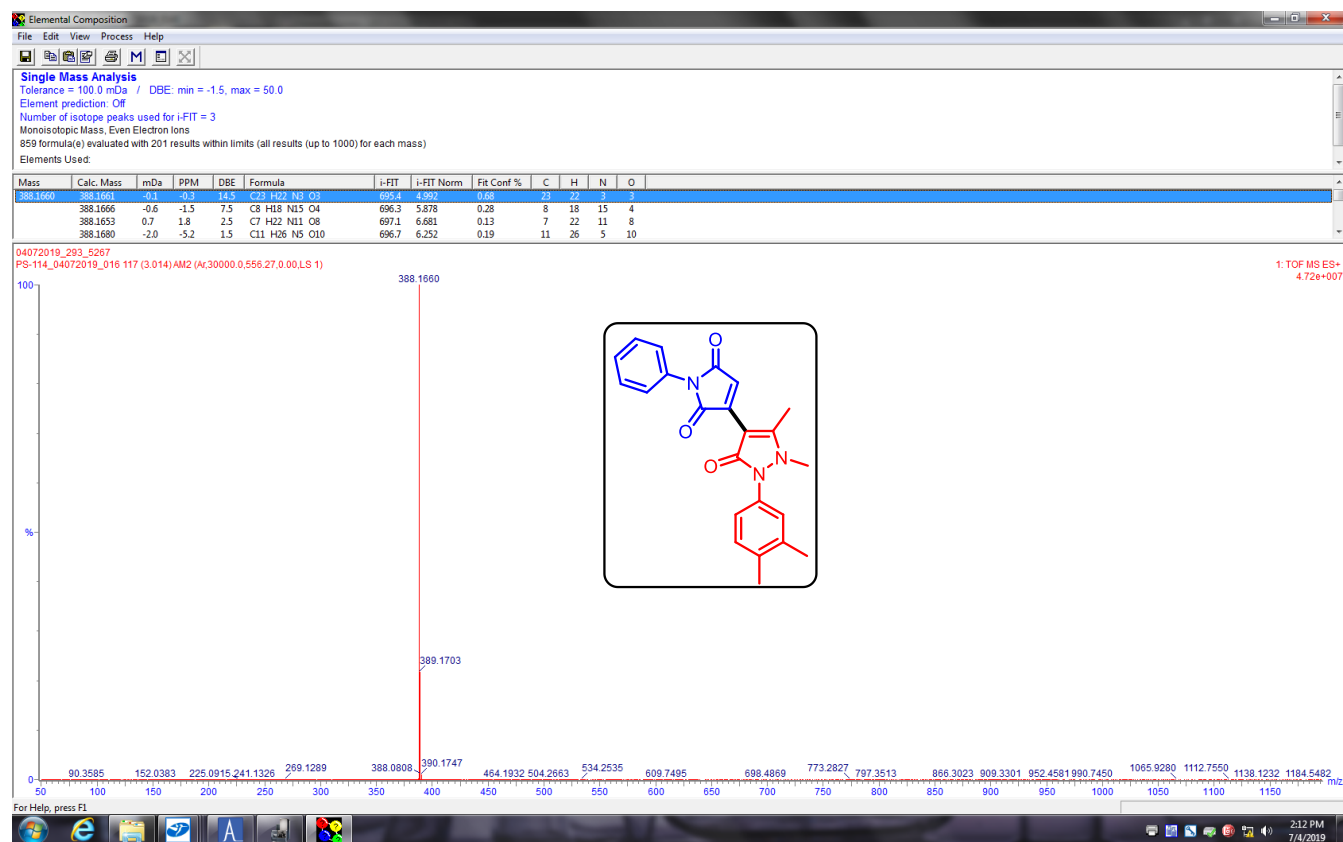

# <sup>1</sup>H and <sup>13</sup>C of Compound 3fa (500 & 125 MHz, CDCl<sub>3</sub>):

39547/1  
39547  
PS-120

7.49  
7.47  
7.45  
7.38  
7.37  
7.36  
7.36  
7.36  
7.35  
7.34  
7.34  
7.27  
7.25

3.32  
3.29  
2.98  
2.96  
2.95  
2.93  
2.63

1.28  
1.27

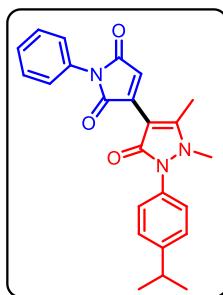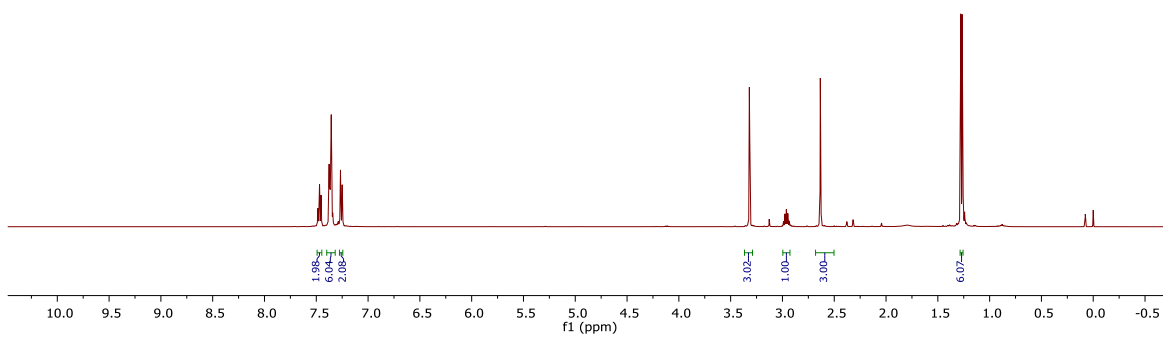

39553/1  
39553  
PS-120

170.45  
169.50  
163.58

150.57  
149.48

137.78  
131.69  
131.18

128.94  
128.94  
127.55  
127.55  
126.27  
126.20  
122.89  
122.85

97.55

77.25  
77.00  
76.74

34.23  
33.82

23.81

13.87

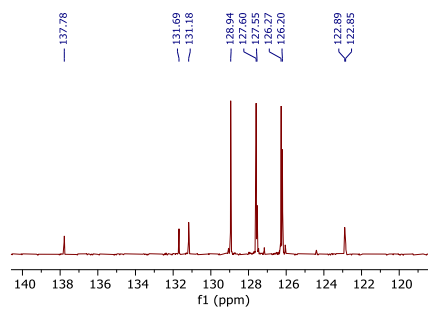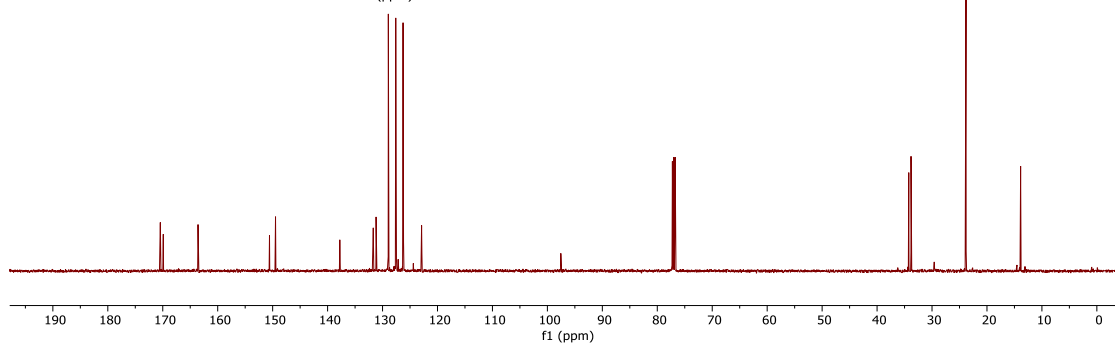



## HRMS Spectra of Compound 3fa:

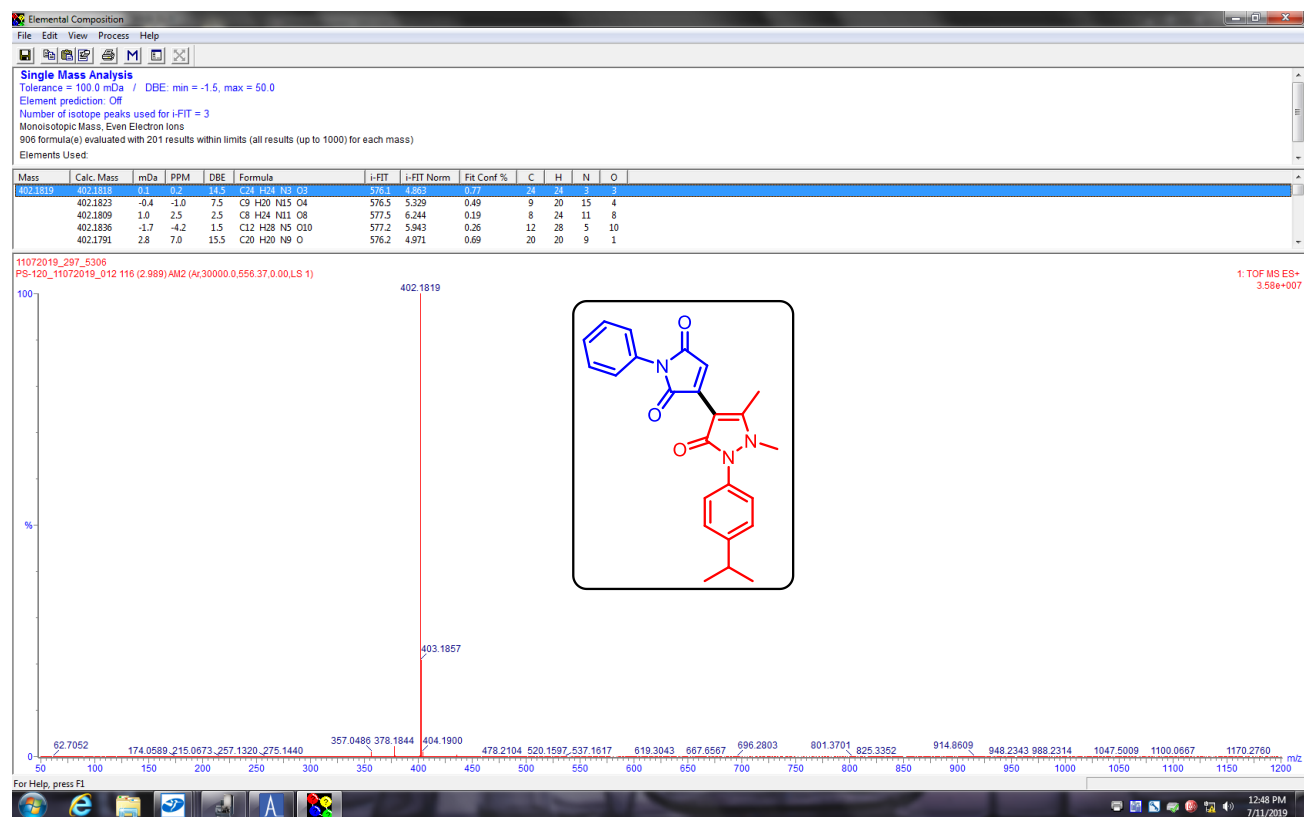

# <sup>1</sup>H and <sup>13</sup>C of Compound 3ga (500 & 125 MHz, CDCl<sub>3</sub>):

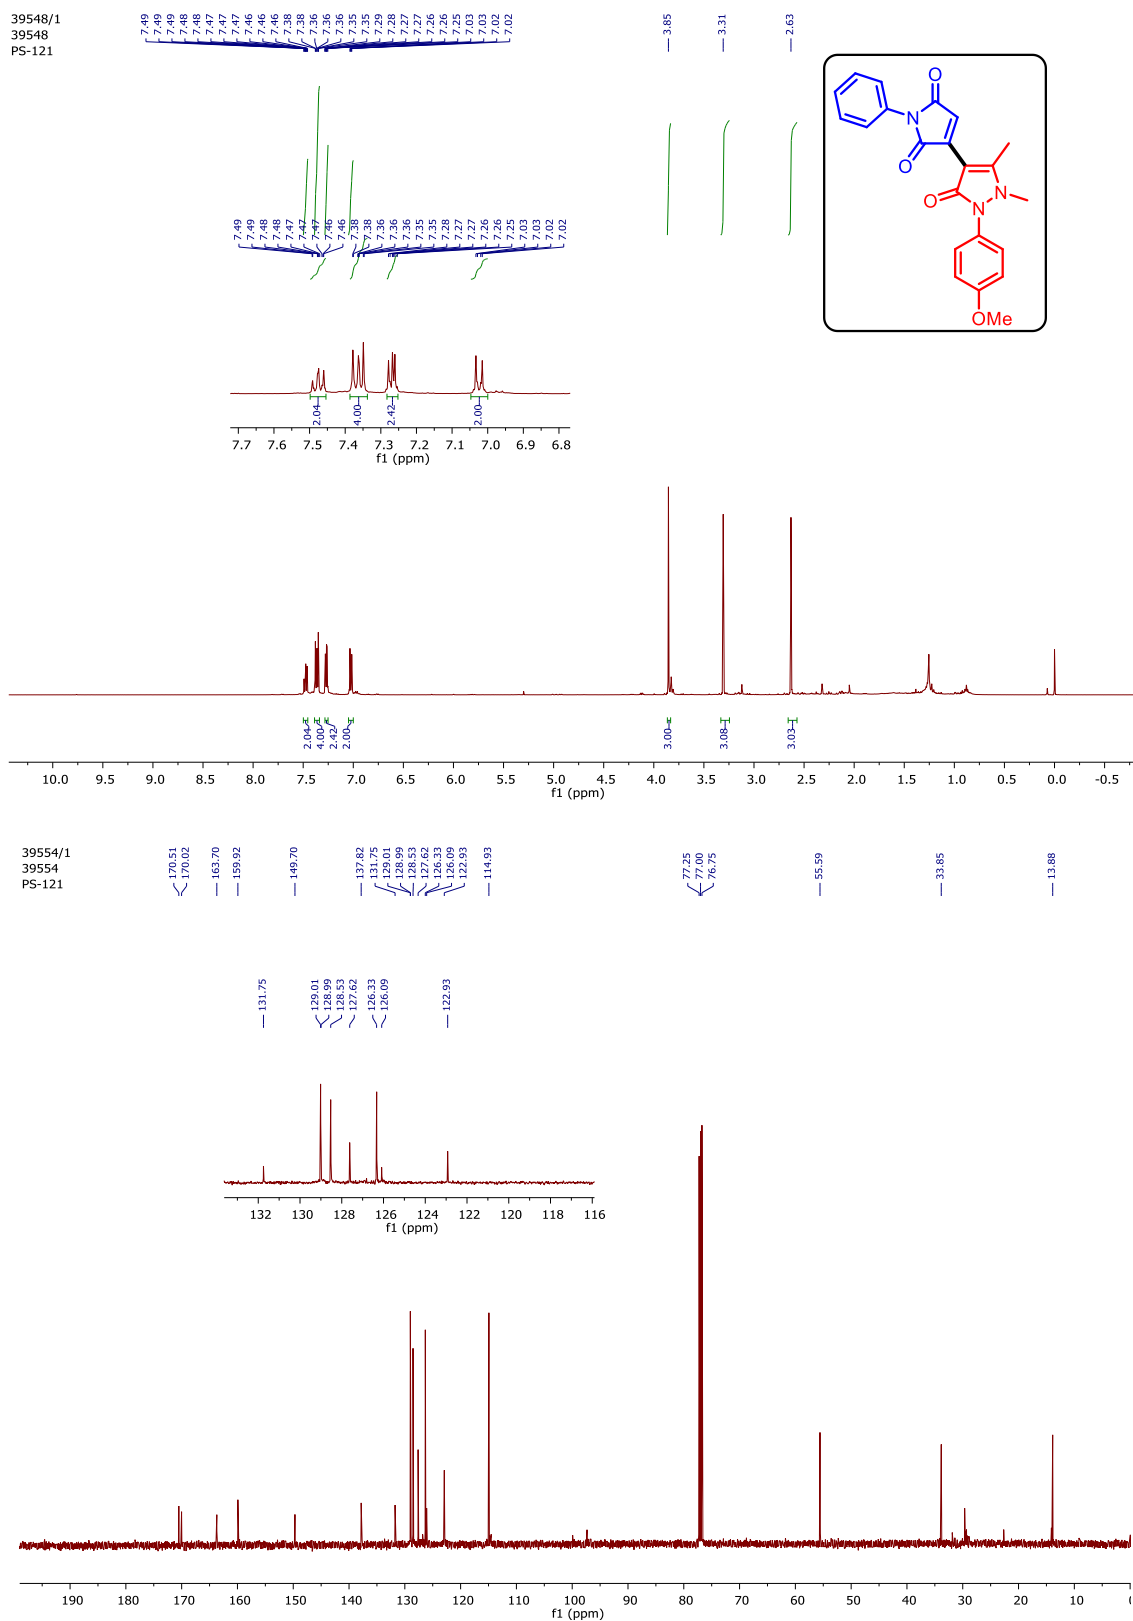

## HRMS Spectra of Compound 3ga:

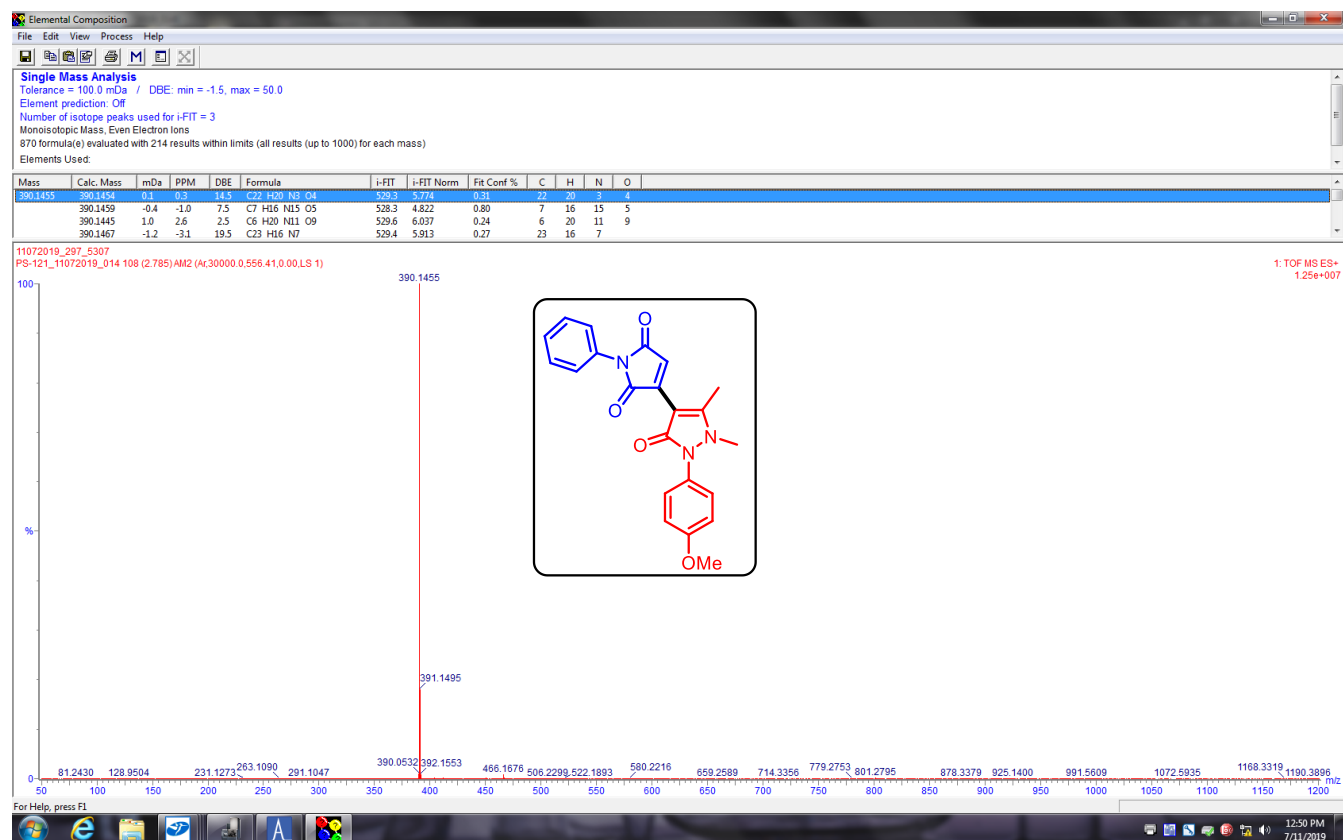

# <sup>1</sup>H and <sup>13</sup>C of Compound 3ha (500 & 125 MHz, CDCl<sub>3</sub>):

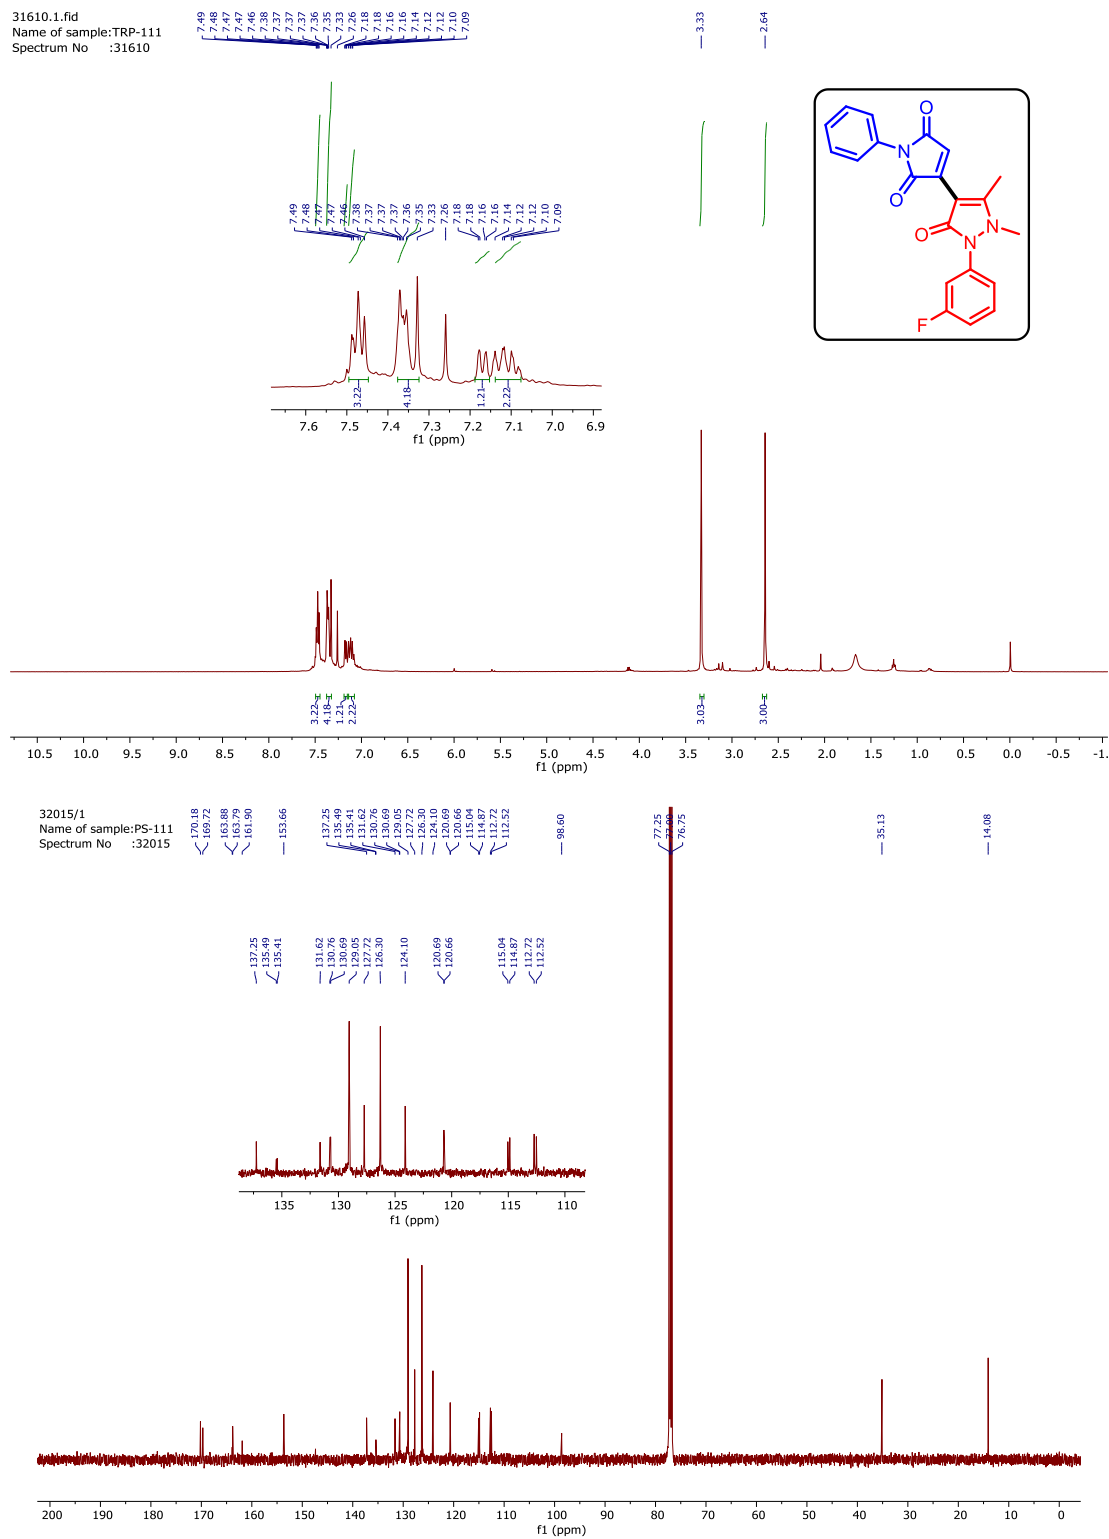

## HRMS Spectra of Compound 3ha:

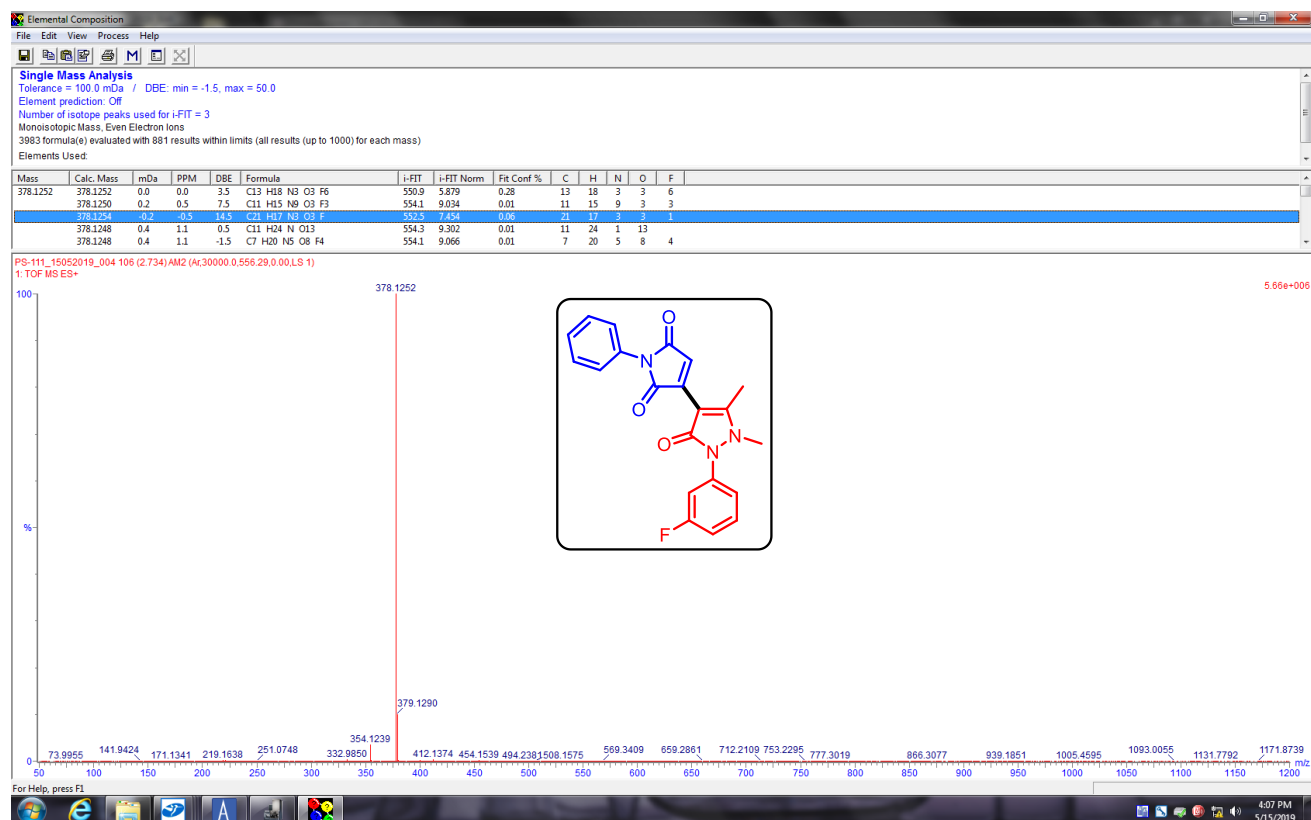

# <sup>1</sup>H and <sup>13</sup>C of Compound 3ia (500 & 125 MHz, CDCl<sub>3</sub>):

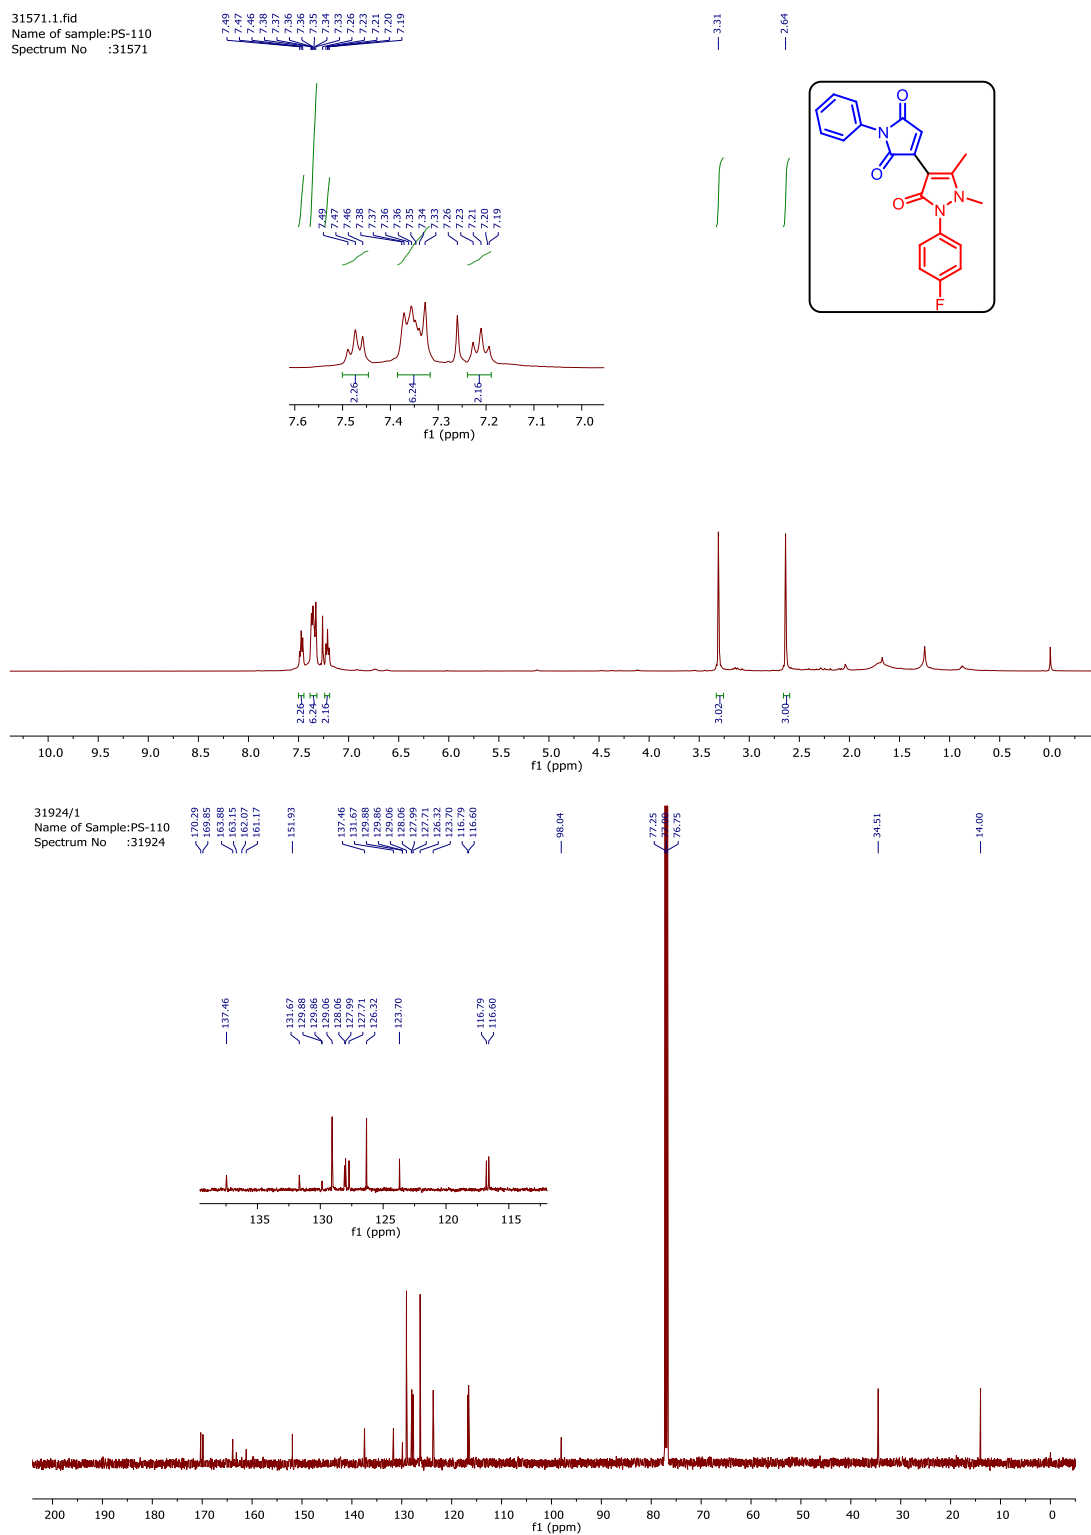

## HRMS Spectra of Compound 3ia:

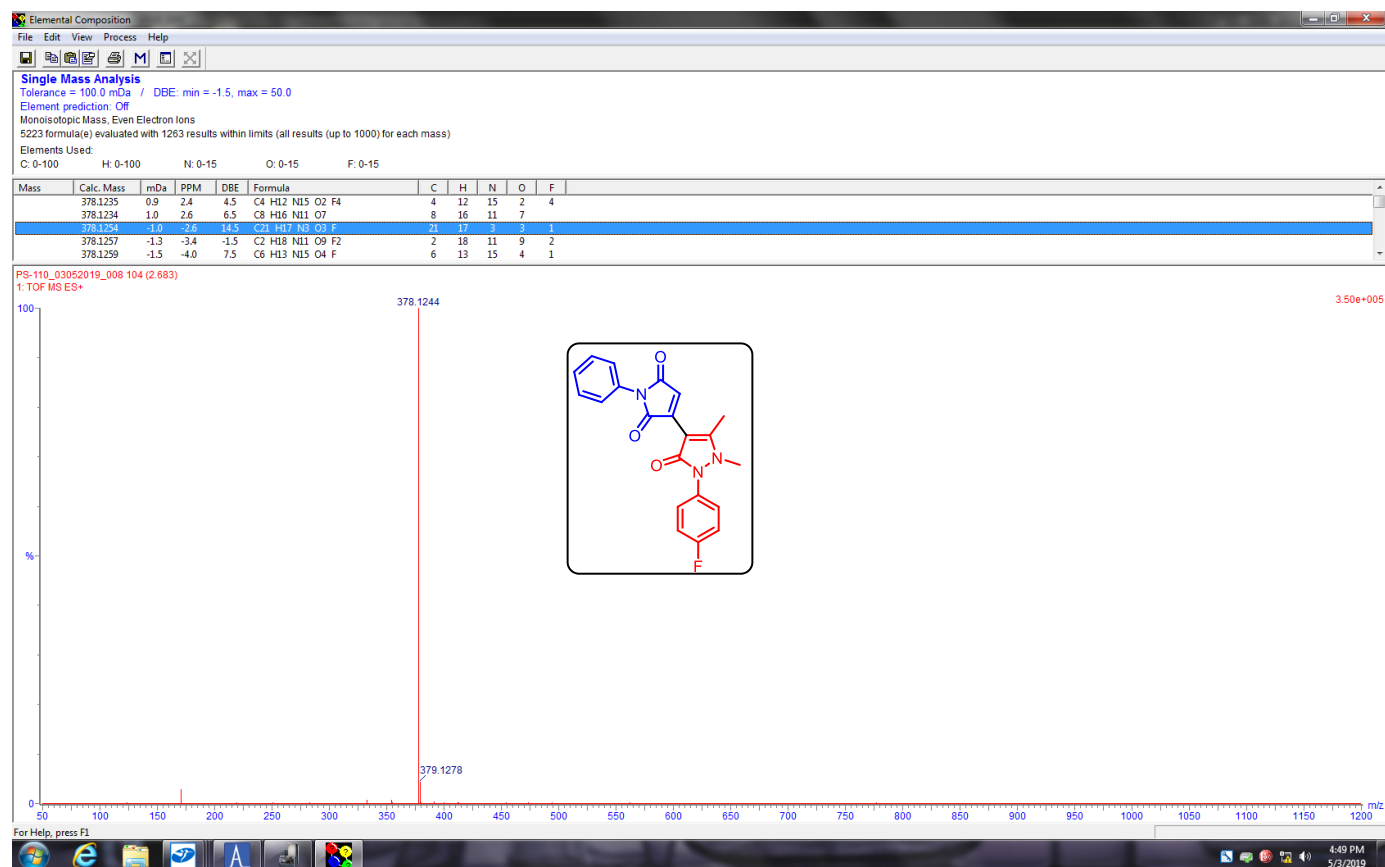

# <sup>1</sup>H and <sup>13</sup>C of Compound 3ja (500 & 125 MHz, CDCl<sub>3</sub>):

39639/1  
Spec No: 39639  
Sample ID :PS-113

7.48  
7.47  
7.46  
7.45  
7.44  
7.43  
7.42  
7.41  
7.40  
7.39  
7.38  
7.37  
7.36  
7.35  
7.34  
7.33  
7.32  
7.31  
7.30  
7.29  
7.28  
7.27  
7.26  
7.25  
7.24  
7.23  
7.22  
7.21  
7.20  
7.19  
7.18  
7.17  
7.16  
7.15  
7.14  
7.13  
7.12  
7.11  
7.10  
7.09  
7.08  
7.07  
7.06  
7.05  
7.04  
7.03  
7.02  
7.01  
7.00  
6.99  
6.98  
6.97  
6.96  
6.95  
6.94  
6.93  
6.92  
6.91  
6.90  
6.89  
6.88  
6.87  
6.86  
6.85  
6.84  
6.83  
6.82  
6.81  
6.80  
6.79  
6.78  
6.77  
6.76  
6.75  
6.74  
6.73  
6.72  
6.71  
6.70  
6.69  
6.68  
6.67  
6.66  
6.65  
6.64  
6.63  
6.62  
6.61  
6.60  
6.59  
6.58  
6.57  
6.56  
6.55  
6.54  
6.53  
6.52  
6.51  
6.50  
6.49  
6.48  
6.47  
6.46  
6.45  
6.44  
6.43  
6.42  
6.41  
6.40  
6.39  
6.38  
6.37  
6.36  
6.35  
6.34  
6.33  
6.32  
6.31  
6.30  
6.29  
6.28  
6.27  
6.26  
6.25  
6.24  
6.23  
6.22  
6.21  
6.20  
6.19  
6.18  
6.17  
6.16  
6.15  
6.14  
6.13  
6.12  
6.11  
6.10  
6.09  
6.08  
6.07  
6.06  
6.05  
6.04  
6.03  
6.02  
6.01  
6.00  
5.99  
5.98  
5.97  
5.96  
5.95  
5.94  
5.93  
5.92  
5.91  
5.90  
5.89  
5.88  
5.87  
5.86  
5.85  
5.84  
5.83  
5.82  
5.81  
5.80  
5.79  
5.78  
5.77  
5.76  
5.75  
5.74  
5.73  
5.72  
5.71  
5.70  
5.69  
5.68  
5.67  
5.66  
5.65  
5.64  
5.63  
5.62  
5.61  
5.60  
5.59  
5.58  
5.57  
5.56  
5.55  
5.54  
5.53  
5.52  
5.51  
5.50  
5.49  
5.48  
5.47  
5.46  
5.45  
5.44  
5.43  
5.42  
5.41  
5.40  
5.39  
5.38  
5.37  
5.36  
5.35  
5.34  
5.33  
5.32  
5.31  
5.30  
5.29  
5.28  
5.27  
5.26  
5.25  
5.24  
5.23  
5.22  
5.21  
5.20  
5.19  
5.18  
5.17  
5.16  
5.15  
5.14  
5.13  
5.12  
5.11  
5.10  
5.09  
5.08  
5.07  
5.06  
5.05  
5.04  
5.03  
5.02  
5.01  
5.00  
4.99  
4.98  
4.97  
4.96  
4.95  
4.94  
4.93  
4.92  
4.91  
4.90  
4.89  
4.88  
4.87  
4.86  
4.85  
4.84  
4.83  
4.82  
4.81  
4.80  
4.79  
4.78  
4.77  
4.76  
4.75  
4.74  
4.73  
4.72  
4.71  
4.70  
4.69  
4.68  
4.67  
4.66  
4.65  
4.64  
4.63  
4.62  
4.61  
4.60  
4.59  
4.58  
4.57  
4.56  
4.55  
4.54  
4.53  
4.52  
4.51  
4.50  
4.49  
4.48  
4.47  
4.46  
4.45  
4.44  
4.43  
4.42  
4.41  
4.40  
4.39  
4.38  
4.37  
4.36  
4.35  
4.34  
4.33  
4.32  
4.31  
4.30  
4.29  
4.28  
4.27  
4.26  
4.25  
4.24  
4.23  
4.22  
4.21  
4.20  
4.19  
4.18  
4.17  
4.16  
4.15  
4.14  
4.13  
4.12  
4.11  
4.10  
4.09  
4.08  
4.07  
4.06  
4.05  
4.04  
4.03  
4.02  
4.01  
4.00  
3.99  
3.98  
3.97  
3.96  
3.95  
3.94  
3.93  
3.92  
3.91  
3.90  
3.89  
3.88  
3.87  
3.86  
3.85  
3.84  
3.83  
3.82  
3.81  
3.80  
3.79  
3.78  
3.77  
3.76  
3.75  
3.74  
3.73  
3.72  
3.71  
3.70  
3.69  
3.68  
3.67  
3.66  
3.65  
3.64  
3.63  
3.62  
3.61  
3.60  
3.59  
3.58  
3.57  
3.56  
3.55  
3.54  
3.53  
3.52  
3.51  
3.50  
3.49  
3.48  
3.47  
3.46  
3.45  
3.44  
3.43  
3.42  
3.41  
3.40  
3.39  
3.38  
3.37  
3.36  
3.35  
3.34  
3.33  
3.32  
3.31  
3.30  
3.29  
3.28  
3.27  
3.26  
3.25  
3.24  
3.23  
3.22  
3.21  
3.20  
3.19  
3.18  
3.17  
3.16  
3.15  
3.14  
3.13  
3.12  
3.11  
3.10  
3.09  
3.08  
3.07  
3.06  
3.05  
3.04  
3.03  
3.02  
3.01  
3.00  
2.99  
2.98  
2.97  
2.96  
2.95  
2.94  
2.93  
2.92  
2.91  
2.90  
2.89  
2.88  
2.87  
2.86  
2.85  
2.84  
2.83  
2.82  
2.81  
2.80  
2.79  
2.78  
2.77  
2.76  
2.75  
2.74  
2.73  
2.72  
2.71  
2.70  
2.69  
2.68  
2.67  
2.66  
2.65  
2.64  
2.63  
2.62  
2.61  
2.60  
2.59  
2.58  
2.57  
2.56  
2.55  
2.54  
2.53  
2.52  
2.51  
2.50  
2.49  
2.48  
2.47  
2.46  
2.45  
2.44  
2.43  
2.42  
2.41  
2.40  
2.39  
2.38  
2.37  
2.36  
2.35  
2.34  
2.33  
2.32  
2.31  
2.30  
2.29  
2.28  
2.27  
2.26  
2.25  
2.24  
2.23  
2.22  
2.21  
2.20  
2.19  
2.18  
2.17  
2.16  
2.15  
2.14  
2.13  
2.12  
2.11  
2.10  
2.09  
2.08  
2.07  
2.06  
2.05  
2.04  
2.03  
2.02  
2.01  
2.00  
1.99  
1.98  
1.97  
1.96  
1.95  
1.94  
1.93  
1.92  
1.91  
1.90  
1.89  
1.88  
1.87  
1.86  
1.85  
1.84  
1.83  
1.82  
1.81  
1.80  
1.79  
1.78  
1.77  
1.76  
1.75  
1.74  
1.73  
1.72  
1.71  
1.70  
1.69  
1.68  
1.67  
1.66  
1.65  
1.64  
1.63  
1.62  
1.61  
1.60  
1.59  
1.58  
1.57  
1.56  
1.55  
1.54  
1.53  
1.52  
1.51  
1.50  
1.49  
1.48  
1.47  
1.46  
1.45  
1.44  
1.43  
1.42  
1.41  
1.40  
1.39  
1.38  
1.37  
1.36  
1.35  
1.34  
1.33  
1.32  
1.31  
1.30  
1.29  
1.28  
1.27  
1.26  
1.25  
1.24  
1.23  
1.22  
1.21  
1.20  
1.19  
1.18  
1.17  
1.16  
1.15  
1.14  
1.13  
1.12  
1.11  
1.10  
1.09  
1.08  
1.07  
1.06  
1.05  
1.04  
1.03  
1.02  
1.01  
1.00  
0.99  
0.98  
0.97  
0.96  
0.95  
0.94  
0.93  
0.92  
0.91  
0.90  
0.89  
0.88  
0.87  
0.86  
0.85  
0.84  
0.83  
0.82  
0.81  
0.80  
0.79  
0.78  
0.77  
0.76  
0.75  
0.74  
0.73  
0.72  
0.71  
0.70  
0.69  
0.68  
0.67  
0.66  
0.65  
0.64  
0.63  
0.62  
0.61  
0.60  
0.59  
0.58  
0.57  
0.56  
0.55  
0.54  
0.53  
0.52  
0.51  
0.50  
0.49  
0.48  
0.47  
0.46  
0.45  
0.44  
0.43  
0.42  
0.41  
0.40  
0.39  
0.38  
0.37  
0.36  
0.35  
0.34  
0.33  
0.32  
0.31  
0.30  
0.29  
0.28  
0.27  
0.26  
0.25  
0.24  
0.23  
0.22  
0.21  
0.20  
0.19  
0.18  
0.17  
0.16  
0.15  
0.14  
0.13  
0.12  
0.11  
0.10  
0.09  
0.08  
0.07  
0.06  
0.05  
0.04  
0.03  
0.02  
0.01  
0.00  
-0.01  
-0.02  
-0.03  
-0.04  
-0.05  
-0.06  
-0.07  
-0.08  
-0.09  
-0.10  
-0.11  
-0.12  
-0.13  
-0.14  
-0.15  
-0.16  
-0.17  
-0.18  
-0.19  
-0.20  
-0.21  
-0.22  
-0.23  
-0.24  
-0.25  
-0.26  
-0.27  
-0.28  
-0.29  
-0.30  
-0.31  
-0.32  
-0.33  
-0.34  
-0.35  
-0.36  
-0.37  
-0.38  
-0.39  
-0.40  
-0.41  
-0.42  
-0.43  
-0.44  
-0.45  
-0.46  
-0.47  
-0.48  
-0.49  
-0.50  
-0.51  
-0.52  
-0.53  
-0.54  
-0.55  
-0.56  
-0.57  
-0.58  
-0.59  
-0.60  
-0.61  
-0.62  
-0.63  
-0.64  
-0.65  
-0.66  
-0.67  
-0.68  
-0.69  
-0.70  
-0.71  
-0.72  
-0.73  
-0.74  
-0.75  
-0.76  
-0.77  
-0.78  
-0.79  
-0.80  
-0.81  
-0.82  
-0.83  
-0.84  
-0.85  
-0.86  
-0.87  
-0.88  
-0.89  
-0.90  
-0.91  
-0.92  
-0.93  
-0.94  
-0.95  
-0.96  
-0.97  
-0.98  
-0.99  
-1.00  
-1.01  
-1.02  
-1.03  
-1.04  
-1.05  
-1.06  
-1.07  
-1.08  
-1.09  
-1.10  
-1.11  
-1.12  
-1.13  
-1.14  
-1.15  
-1.16  
-1.17  
-1.18  
-1.19  
-1.20  
-1.21  
-1.22  
-1.23  
-1.24  
-1.25  
-1.26  
-1.27  
-1.28  
-1.29  
-1.30  
-1.31  
-1.32  
-1.33  
-1.34  
-1.35  
-1.36  
-1.37  
-1.38  
-1.39  
-1.40  
-1.41  
-1.42  
-1.43  
-1.44  
-1.45  
-1.46  
-1.47  
-1.48  
-1.49  
-1.50  
-1.51  
-1.52  
-1.53  
-1.54  
-1.55  
-1.56  
-1.57  
-1.58  
-1.59  
-1.60  
-1.61  
-1.62  
-1.63  
-1.64  
-1.65  
-1.66  
-1.67  
-1.68  
-1.69  
-1.70  
-1.71  
-1.72  
-1.73  
-1.74  
-1.75  
-1.76  
-1.77  
-1.78  
-1.79  
-1.80  
-1.81  
-1.82  
-1.83  
-1.84  
-1.85  
-1.86  
-1.87  
-1.88  
-1.89  
-1.90  
-1.91  
-1.92  
-1.93  
-1.94  
-1.95  
-1.96  
-1.97  
-1.98  
-1.99  
-2.00  
-2.01  
-2.02  
-2.03  
-2.04  
-2.05  
-2.06  
-2.07  
-2.08  
-2.09  
-2.10  
-2.11  
-2.12  
-2.13  
-2.14  
-2.15  
-2.16  
-2.17  
-2.18  
-2.19  
-2.20  
-2.21  
-2.22  
-2.23  
-2.24  
-2.25  
-2.26  
-2.27  
-2.28  
-2.29  
-2.30  
-2.31  
-2.32  
-2.33  
-2.34  
-2.35  
-2.36  
-2.37  
-2.38  
-2.39  
-2.40  
-2.41  
-2.42  
-2.43  
-2.44  
-2.45  
-2.46  
-2.47  
-2.48  
-2.49  
-2.50  
-2.51  
-2.52  
-2.53  
-2.54  
-2.55  
-2.56  
-2.57  
-2.58  
-2.59  
-2.60  
-2.61  
-2.62  
-2.63  
-2.64  
-2.65  
-2.66  
-2.67  
-2.68  
-2.69  
-2.70  
-2.71  
-2.72  
-2.73  
-2.74  
-2.75  
-2.76  
-2.77  
-2.78  
-2.79  
-2.80  
-2.81  
-2.82  
-2.83  
-2.84  
-2.85  
-2.86  
-2.87  
-2.88  
-2.89  
-2.90  
-2.91  
-2.92  
-2.93  
-2.94  
-2.95  
-2.96  
-2.97  
-2.98  
-2.99  
-3.00  
-3.01  
-3.02  
-3.03  
-3.04  
-3.05  
-3.06  
-3.07  
-3.08  
-3.09  
-3.10  
-3.11  
-3.12  
-3.13  
-3.14  
-3.15  
-3.16  
-3.17  
-3.18  
-3.19  
-3.20  
-3.21  
-3.22  
-3.23  
-3.24  
-3.25  
-3.26  
-3.27  
-3.28  
-3.29  
-3.30  
-3.31  
-3.32  
-3.33  
-3.34  
-3.35  
-3.36  
-3.37  
-3.38  
-3.39  
-3.40  
-3.41  
-3.42  
-3.43  
-3.44  
-3.45  
-3.46  
-3.47  
-3.48  
-3.49  
-3.50  
-3.51  
-3.52  
-3.53  
-3.54  
-3.55  
-3.56  
-3.57  
-3.58  
-3.59  
-3.60  
-3.61  
-3.62  
-3.63  
-3.64  
-3.65  
-3.66  
-3.67  
-3.68  
-3.69  
-3.70  
-3.71  
-3.72  
-3.73  
-3.74  
-3.75  
-3.76  
-3.77  
-3.78  
-3.79  
-3.80  
-3.81  
-3.82  
-3.83  
-3.84  
-3.85  
-3.86  
-3.87  
-3.88  
-3.89  
-3.90  
-3.91  
-3.92  
-3.93  
-3.94  
-3.95  
-3.96  
-3.97  
-3.98  
-3.99  
-4.00  
-4.01  
-4.02  
-4.03  
-4.04  
-4.05  
-4.06  
-4.07  
-4.08  
-4.09  
-4.10  
-4.11  
-4.12  
-4.13  
-4.14  
-4.15  
-4.16  
-4.17  
-4.18  
-4.19  
-4.20  
-4.21  
-4.22  
-4.23  
-4.24  
-4.25  
-4.26  
-4.27  
-4.28  
-4.29  
-4.30  
-4.31  
-4.32  
-4.33  
-4.34  
-4.35  
-4.36  
-4.37  
-4.38  
-4.39  
-4.40  
-4.41  
-4.42  
-4.43  
-4.44  
-4.45  
-4.46  
-4.47  
-4.48  
-4.49  
-4.50  
-4.51  
-4.52  
-4.53  
-4.54  
-4.55  
-4.56  
-4.57  
-4.58  
-4.59  
-4.60  
-4.61  
-4.62  
-4.63  
-4.64  
-4.65  
-4.66  
-4.67  
-4.68  
-4.69  
-4.70  
-4.71  
-4.72  
-4.73  
-4.74  
-4.75  
-4.76  
-4.77  
-4.78  
-4.79  
-4.80  
-4.81  
-4.82  
-4.83  
-4.84  
-4.85  
-4.86  
-4.87  
-4.88  
-4.89  
-4.90  
-4.91  
-4.92  
-4.93  
-4.94  
-4.95  
-4.96  
-4.97  
-4.98  
-4.99  
-5.00  
-5.01  
-5.02  
-5.03  
-5.04  
-5.05  
-5.06  
-5.07  
-5.08  
-5.09  
-5.10  
-5.11  
-5.12  
-5.13  
-5.14  
-5.15  
-5.16  
-5.17  
-5.18  
-5.19  
-5.20  
-5.21  
-5.22  
-5.23  
-5.24  
-5.25  
-5.26  
-5.27  
-5.28  
-5.29  
-5.30  
-5.31  
-5.32  
-5.33  
-5.34  
-5.35  
-5.36  
-5.37  
-5.38  
-5.39  
-5.40  
-5.41  
-5.42  
-5.43  
-5.44  
-5.45  
-5.46  
-5.47  
-5.48  
-5.49  
-5.50  
-5.51  
-5.52  
-5.53  
-5.54  
-5.55  
-5.56  
-5.57  
-5.58  
-5.59  
-5.60  
-5.61  
-5.62  
-5.63  
-5.64  
-5.65  
-5.66  
-5.67  
-5.68  
-5.69  
-5.70  
-5.71  
-5.72  
-5.73  
-5.74  
-5.75  
-5.76  
-5.77  
-5.78  
-5.79  
-5.80  
-5.81  
-5.82  
-5.83  
-5.84  
-5.85  
-5.86  
-5.87  
-5.88  
-5.89  
-5.90  
-5.91  
-5.92  
-5.93  
-5.94  
-5.95  
-5.96  
-5.97  
-5.98  
-5.99  
-6.00  
-6.01  
-6.02  
-6.03  
-6.04  
-6.05  
-6.06  
-6.07  
-6.08  
-6.09  
-6.10  
-6.11  
-6.12  
-6.13  
-6.14  
-6.15  
-6.16  
-6.17  
-6.18  
-6.19  
-6.20  
-6.21  
-6.22  
-6.23  
-6.24  
-6.25  
-6.26  
-6.27  
-6.28  
-6.29  
-6.30  
-6.31  
-6.32  
-6.33  
-6.34  
-6.35  
-6.36  
-6.37  
-6.38  
-6.39  
-6.40  
-6.41  
-6.42  
-6.43  
-6.44  
-6.45  
-6.46  
-6.47  
-6.48  
-6.49  
-6.50  
-6.51  
-6.52  
-6.53  
-6.54  
-6.55  
-6.56  
-6.57  
-6.58  
-6.59  
-6.60  
-6.61  
-6.62  
-6.63  
-6.64  
-6.65  
-6.66  
-6.67  
-6.68  
-6.69  
-6.70  
-6.71  
-6.72  
-6.73  
-6.74  
-6.75  
-6.76  
-6.77  
-6.78  
-6.79  
-6.80  
-6.81  
-6.82  
-6.83  
-6.84  
-6.85  
-6.86  
-6.87  
-6.88  
-6.89  
-6.90  
-6.91  
-6.92  
-6.93  
-6.94  
-6.95  
-6.96  
-6.97  
-6.98  
-6.99  
-7.00  
-7.01  
-7.02  
-7.03  
-7.04  
-7.05  
-7.06  
-7.07  
-7.08  
-7.09  
-7.10  
-7.11  
-7.12  
-7.13  
-7.14  
-7.15  
-7.16  
-7.17  
-7.18  
-7.19  
-7.20  
-7.21  
-7.22  
-7.23  
-7.24  
-7.25  
-7.26  
-7.27  
-7.28  
-7.29  
-7.30  
-7.31  
-7.32  
-7.33  
-7.34  
-7.35  
-7.36  
-7.37  
-7.38  
-7.39  
-7.40  
-7.41  
-7.42  
-7.43  
-7.44  
-7.45  
-7.46  
-7.47  
-7.48

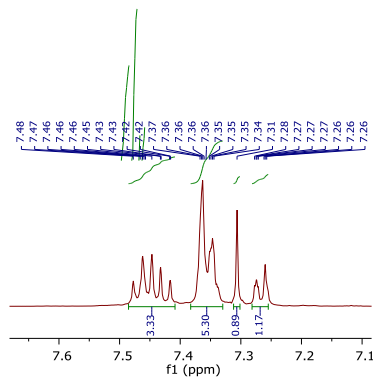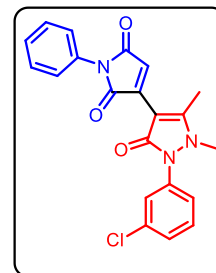

31990/1  
Name of sample:SB-113  
Spectrum No :31990

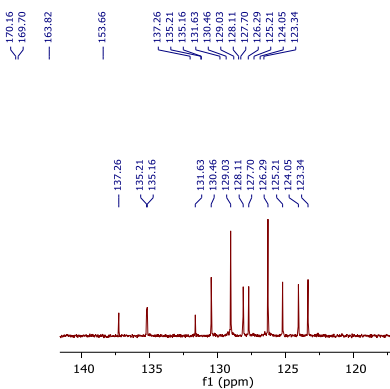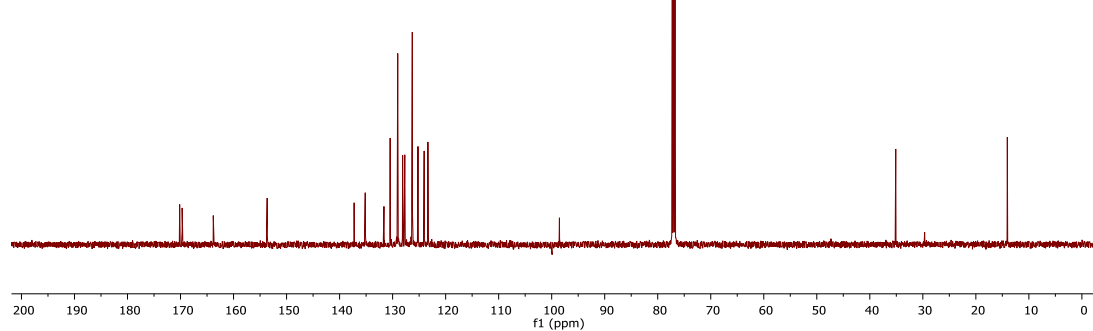



## HRMS Spectra of Compound 3ja:

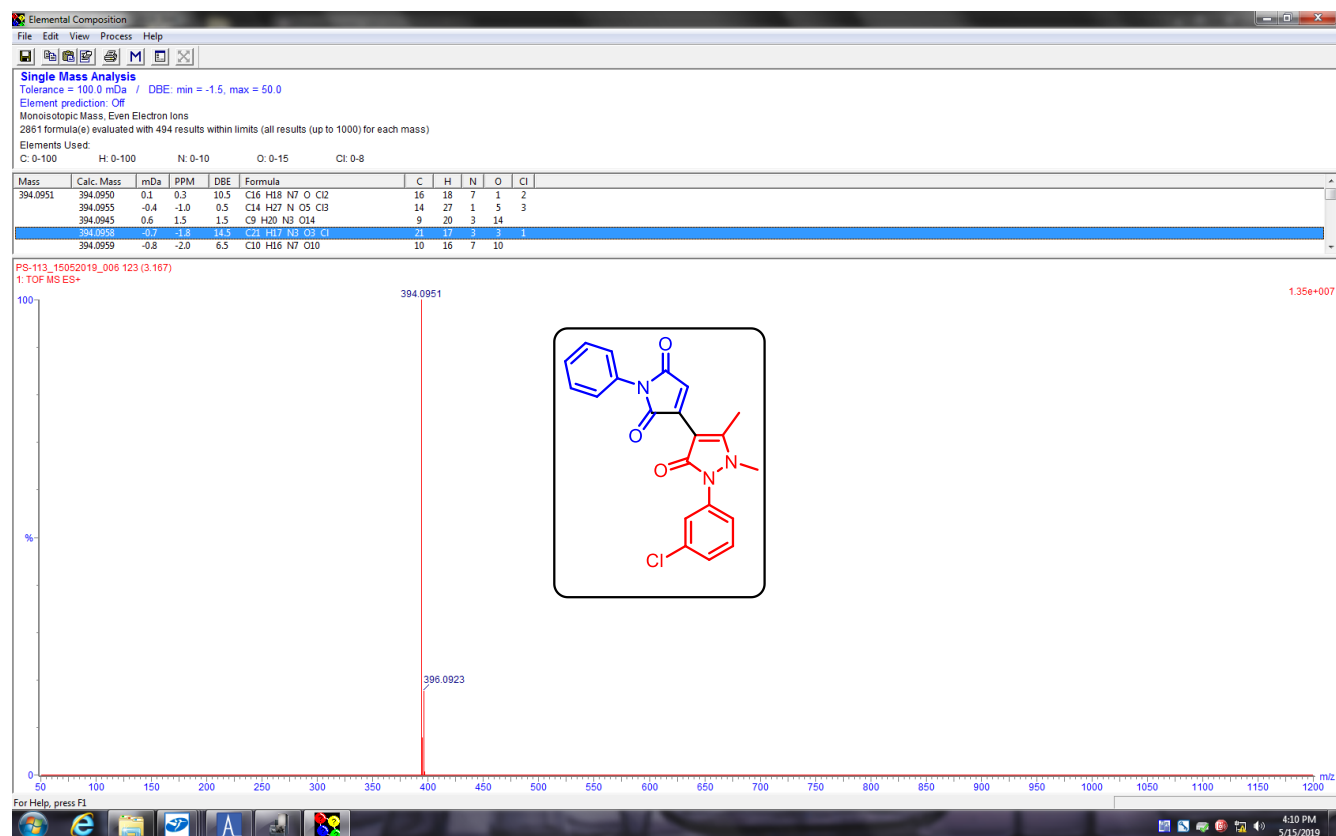

# <sup>1</sup>H and <sup>13</sup>C of Compound 3ka (500 & 125 MHz, CDCl<sub>3</sub>):

31608.1.fid  
Name of sample:PS-112  
Spectrum No :31608

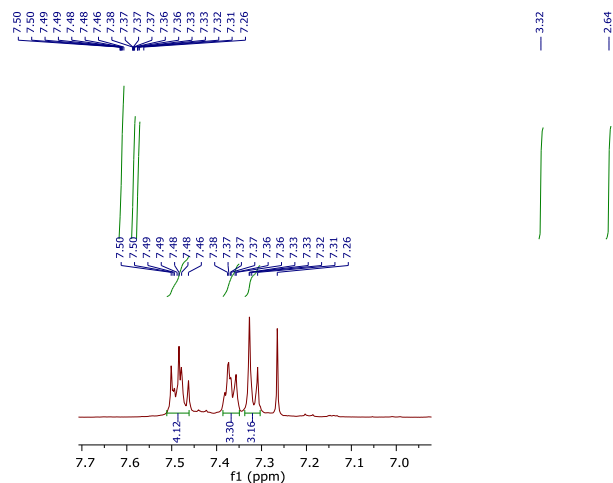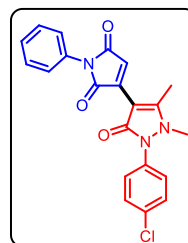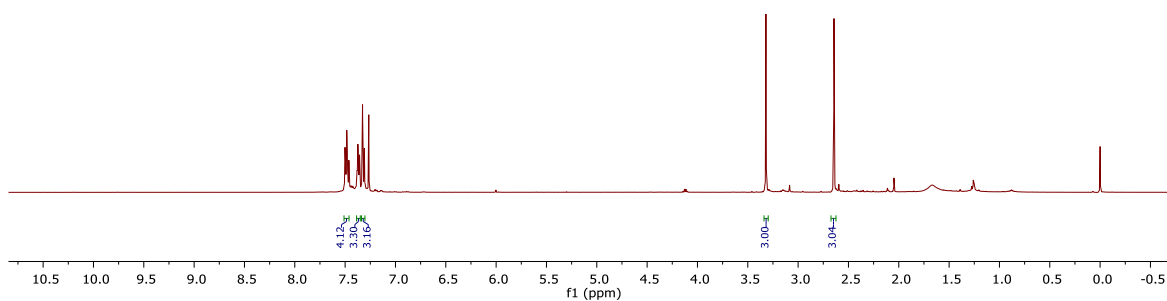

31983/1  
Name of sample:PS-112  
Spectrum No :31983

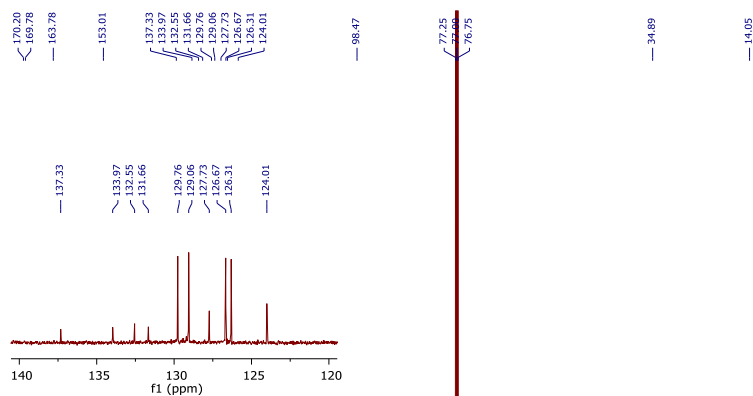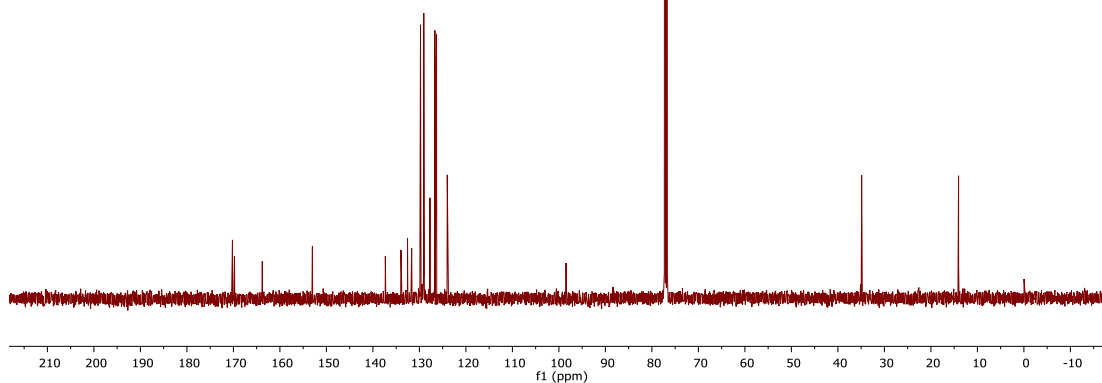

## HRMS Spectra of Compound 3ka:

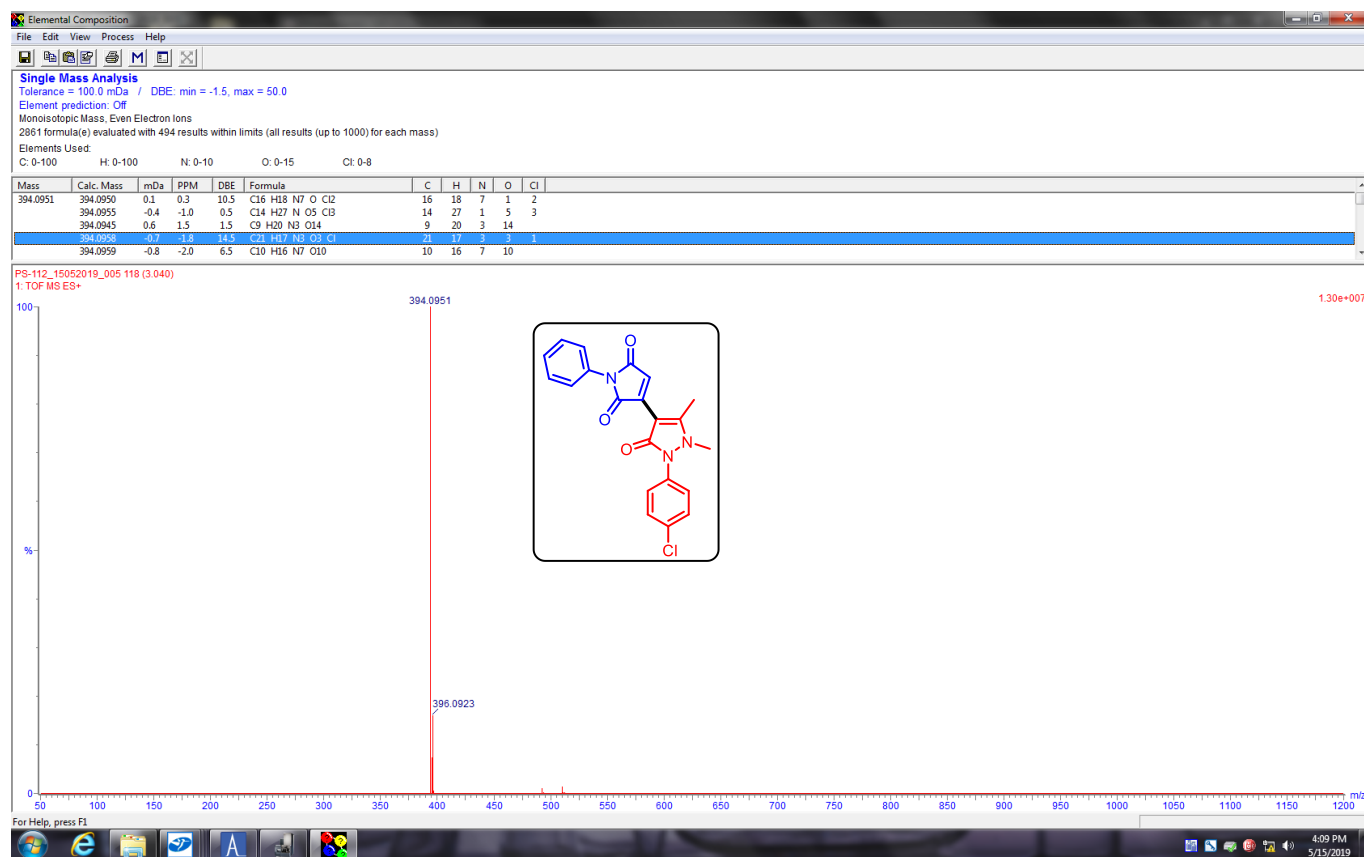

**$^1\text{H}$  and  $^{13}\text{C}$  of Compound 3la (500 & 125 MHz,  $\text{CDCl}_3$ ):**

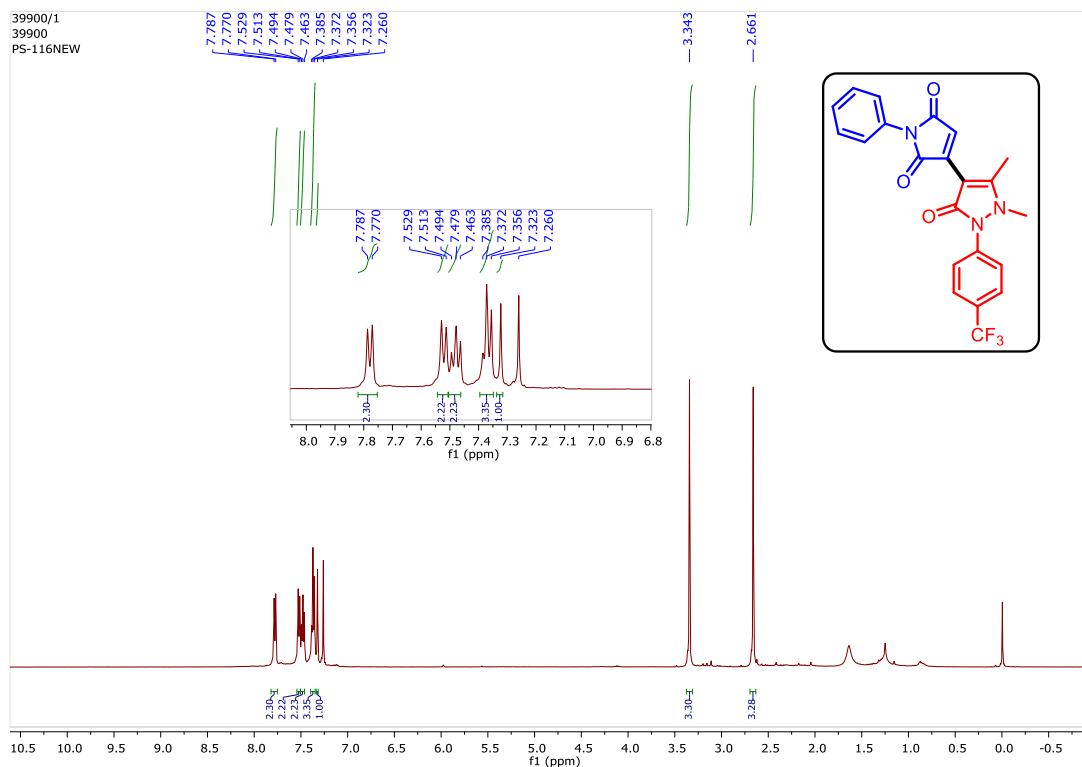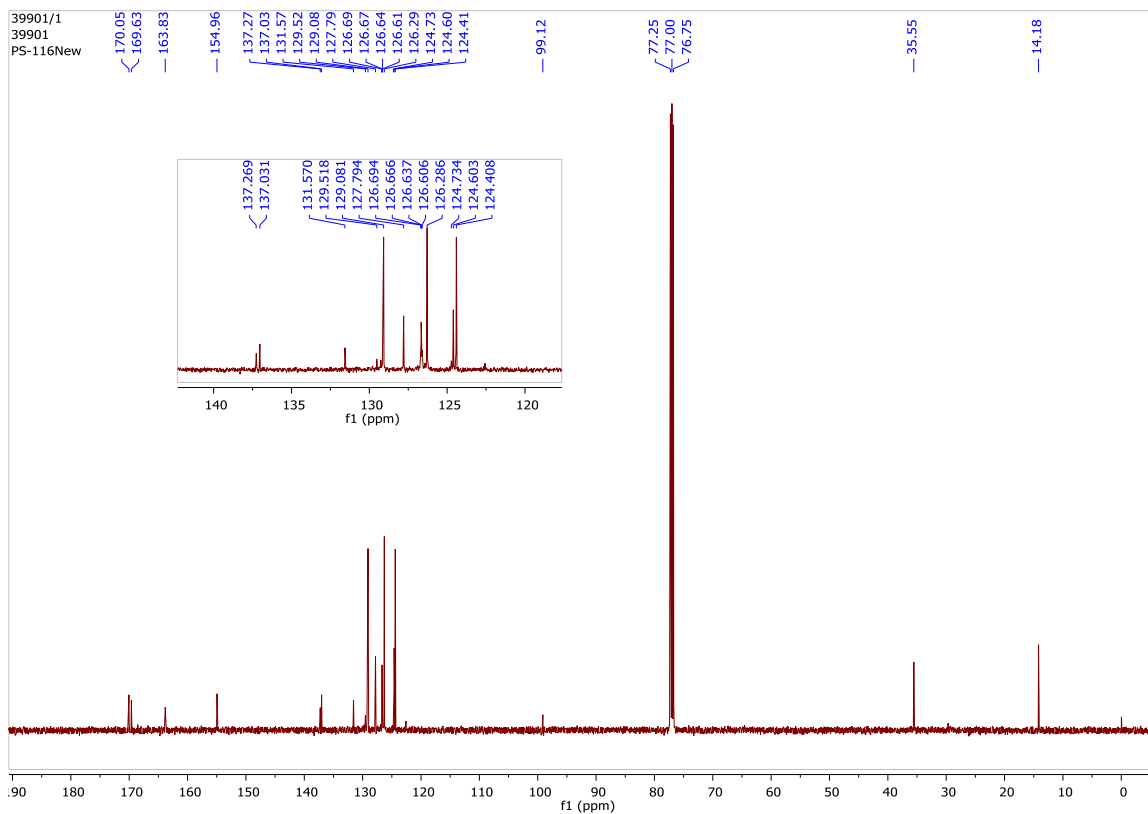

## HRMS Spectra of Compound 3la:

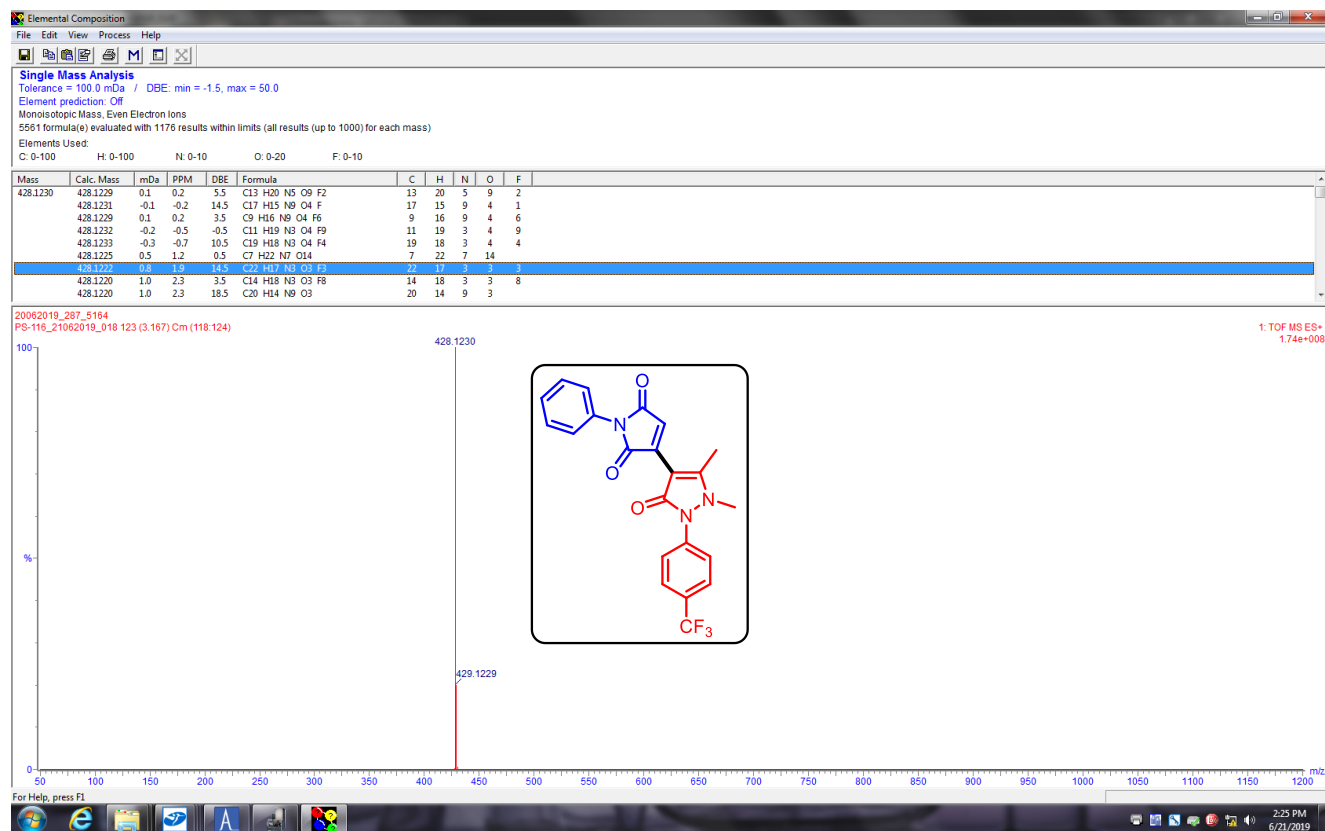

# <sup>1</sup>H and <sup>13</sup>C of Compound 3ma (500 & 125 MHz, CDCl<sub>3</sub>):

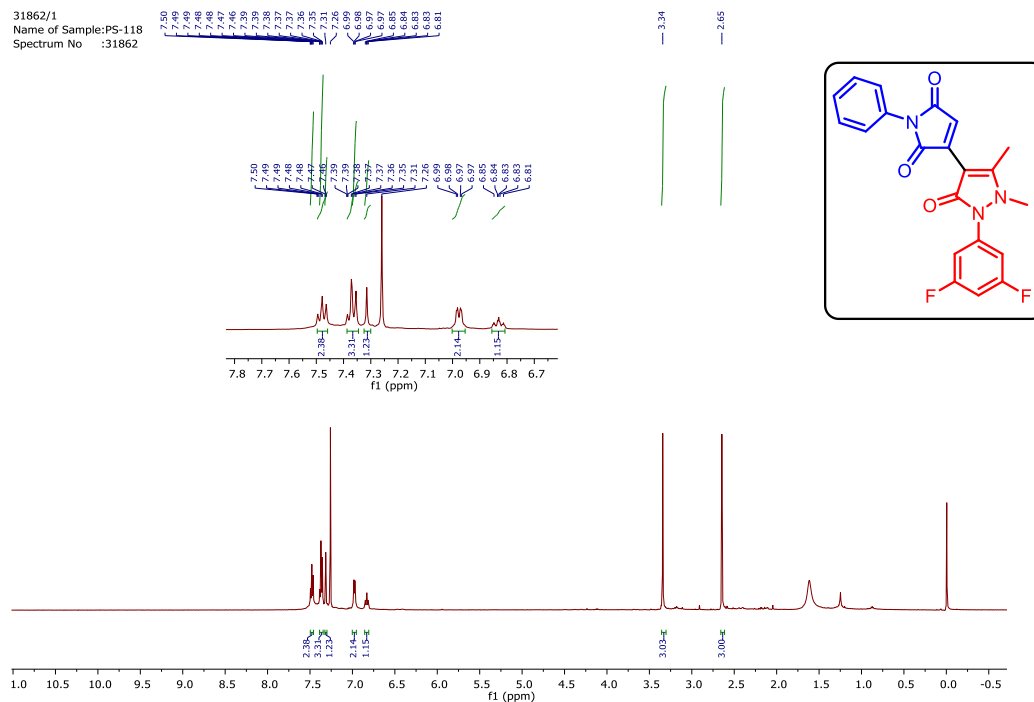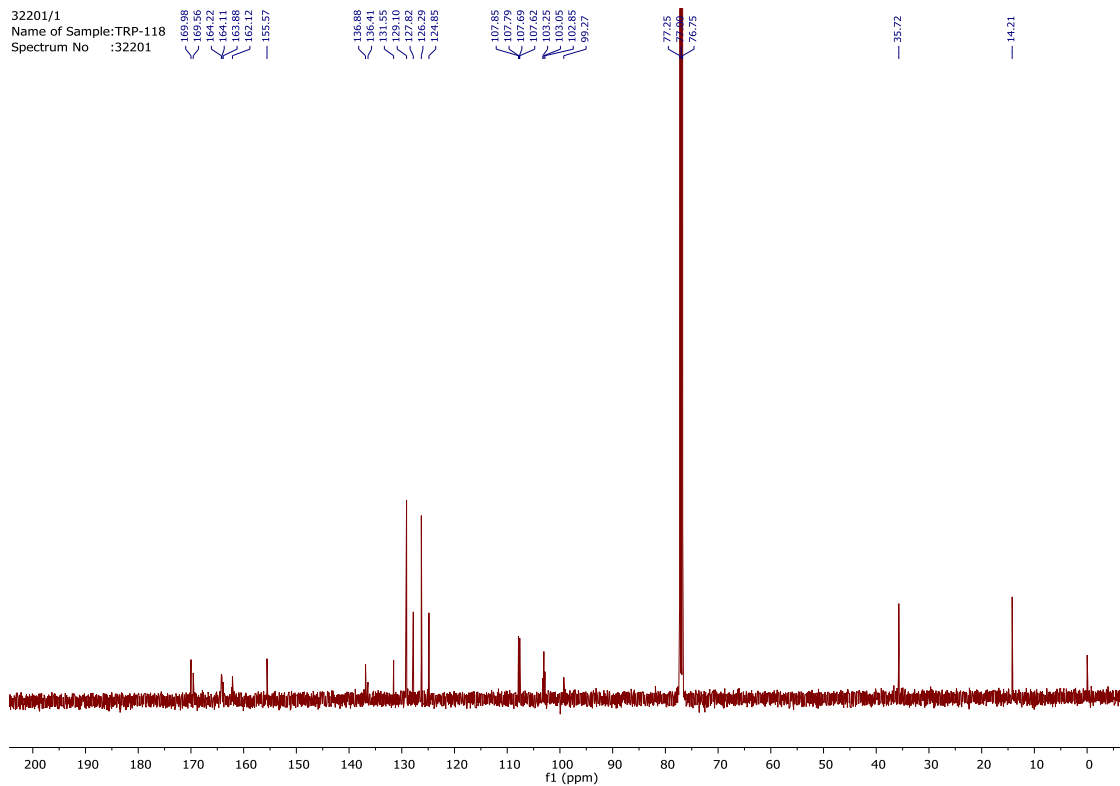

## HRMS Spectra of Compound 3ma:

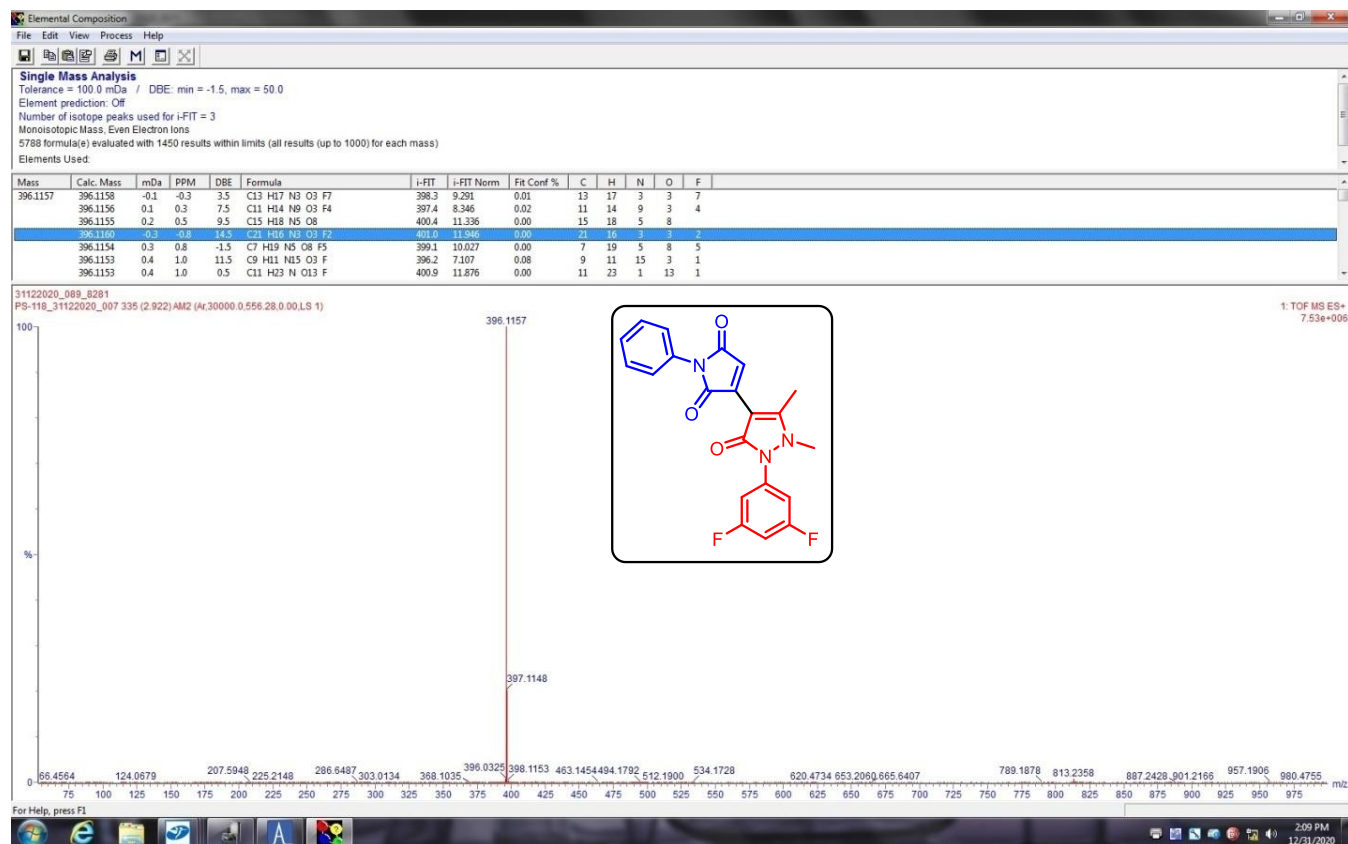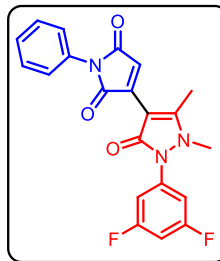

# <sup>1</sup>H and <sup>13</sup>C of Compound 3na (500 & 125 MHz, CDCl<sub>3</sub>):

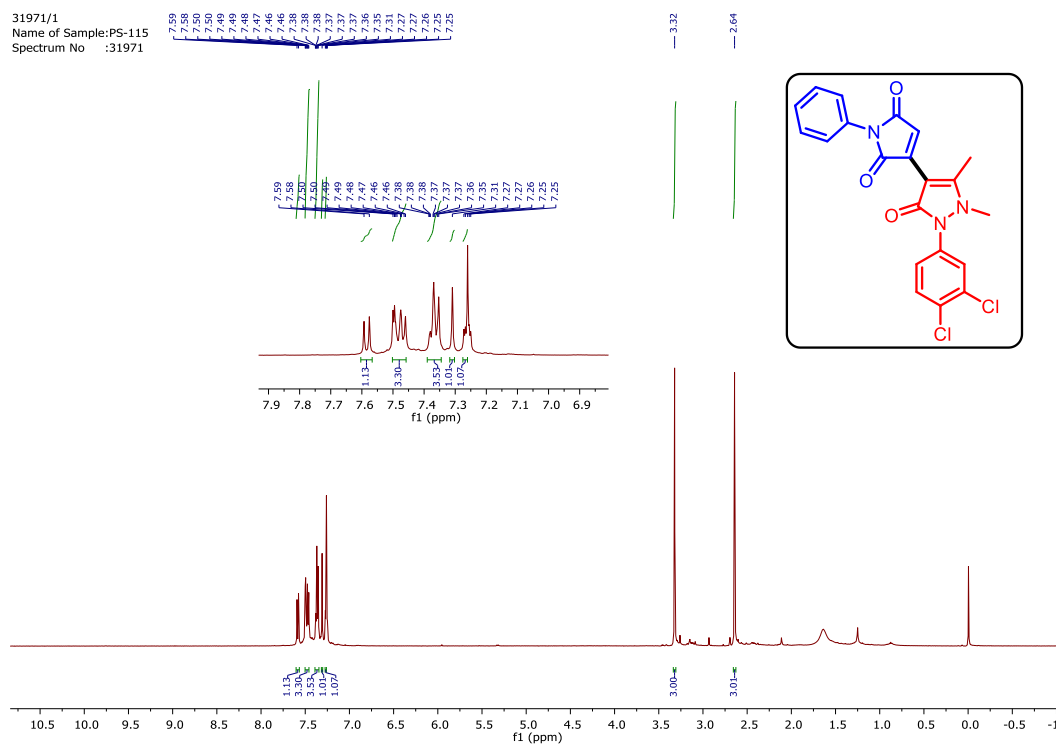



## HRMS Spectra of Compound 3na:

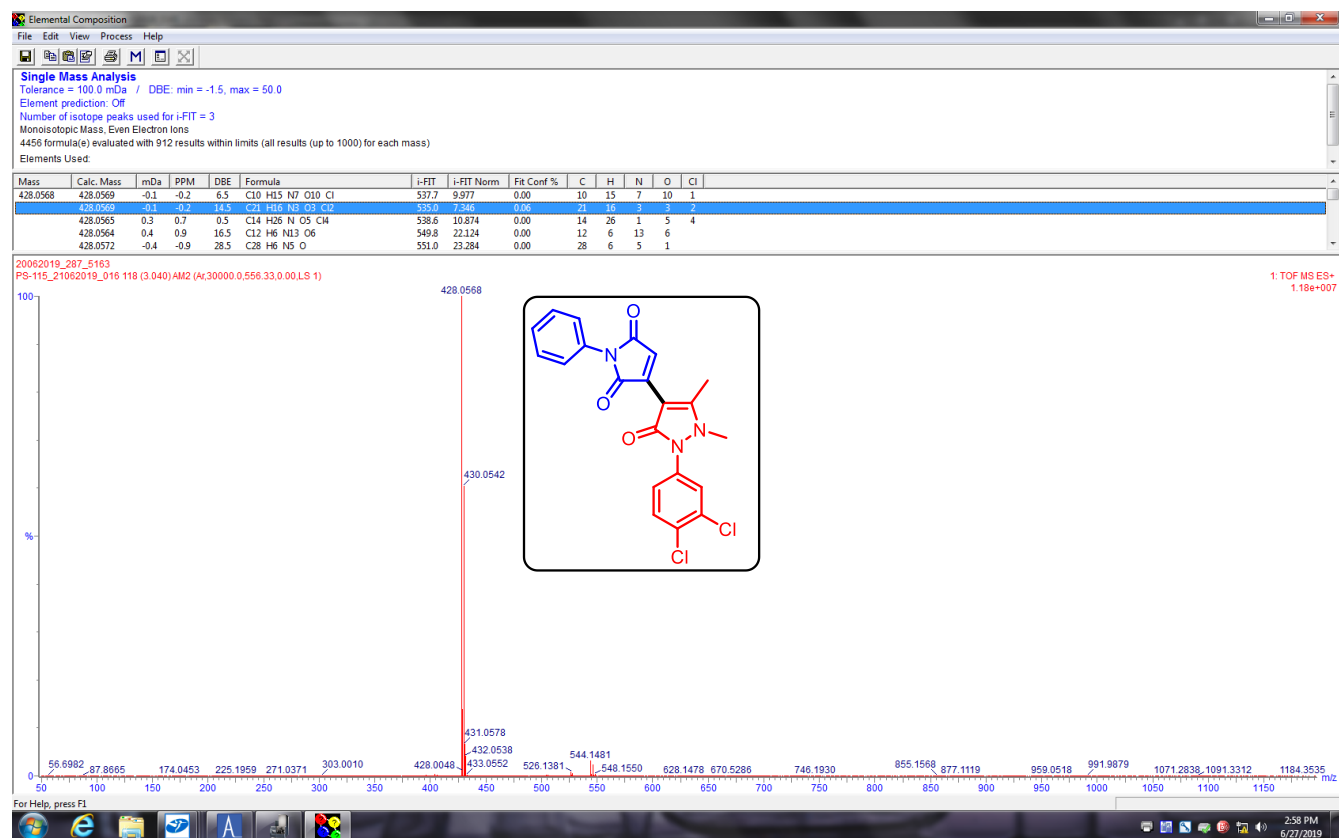

# <sup>1</sup>H and <sup>13</sup>C of Compound 3ab (500 & 125 MHz, CDCl<sub>3</sub>):

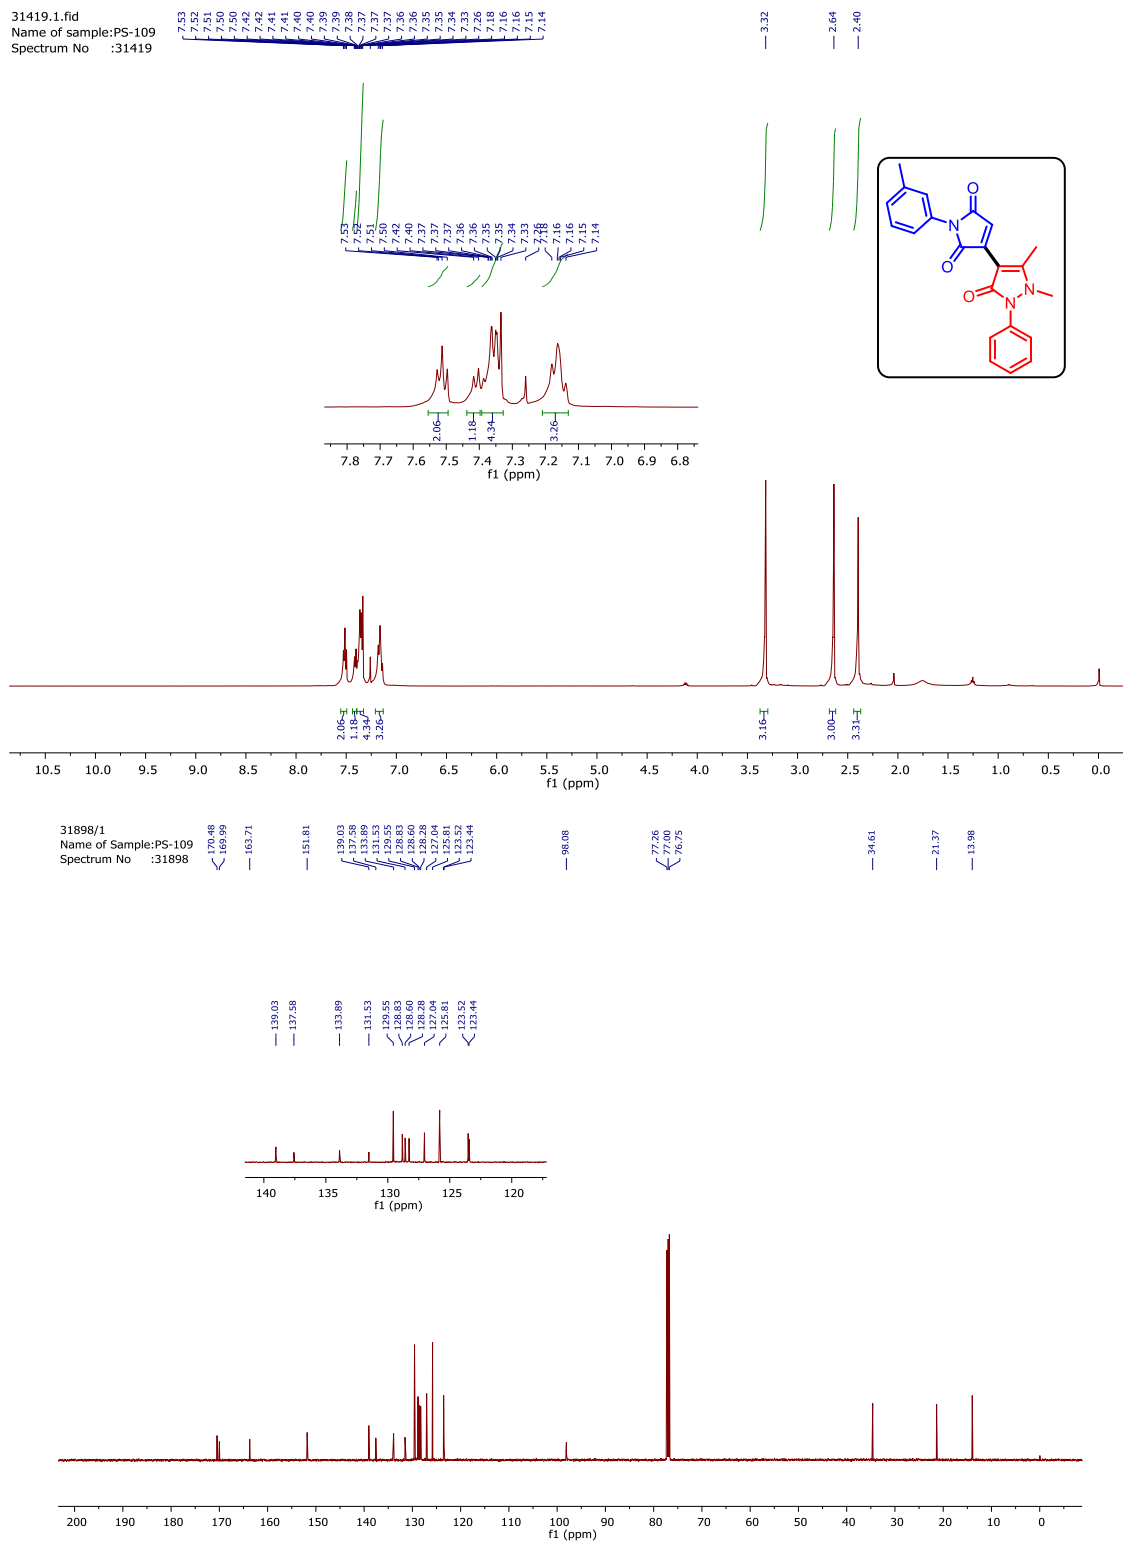

## HRMS Spectra of Compound 3ab:

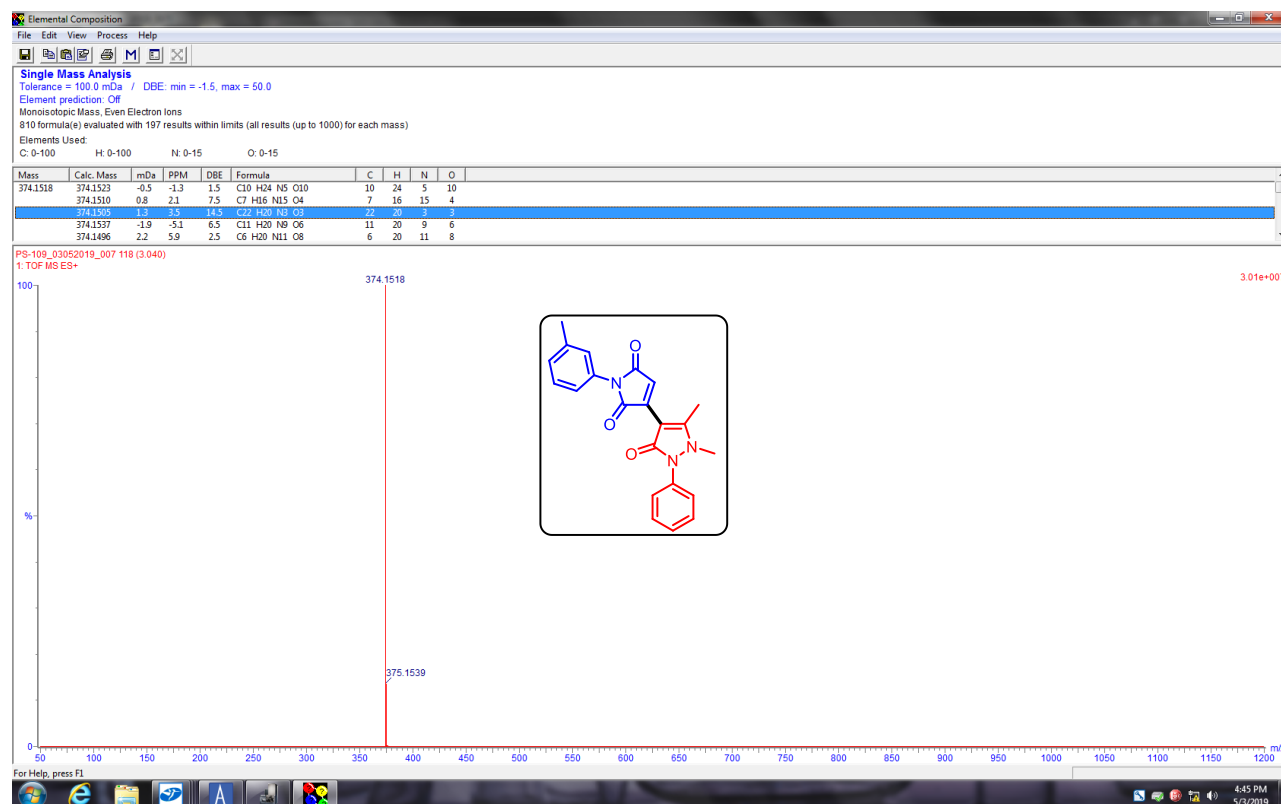

# $^1\text{H}$ and $^{13}\text{C}$ of Compound 3ac (500 & 125 MHz, $\text{CDCl}_3$ ):

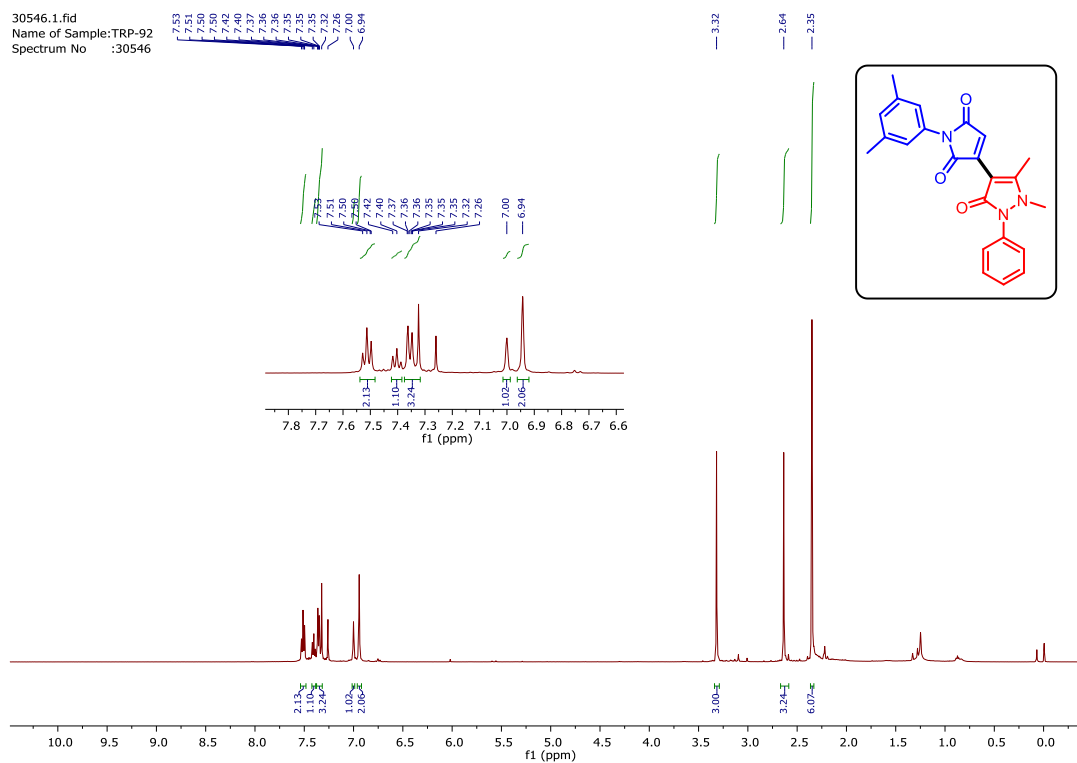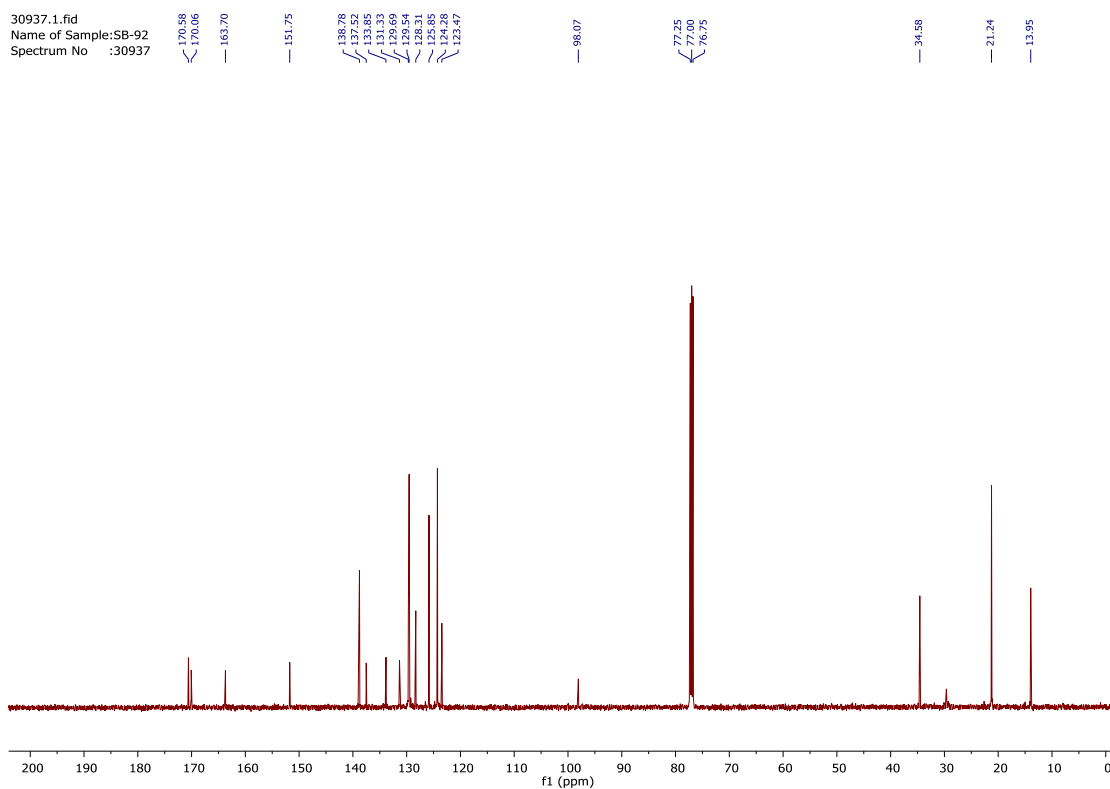

## HRMS Spectra of Compound 3ac:

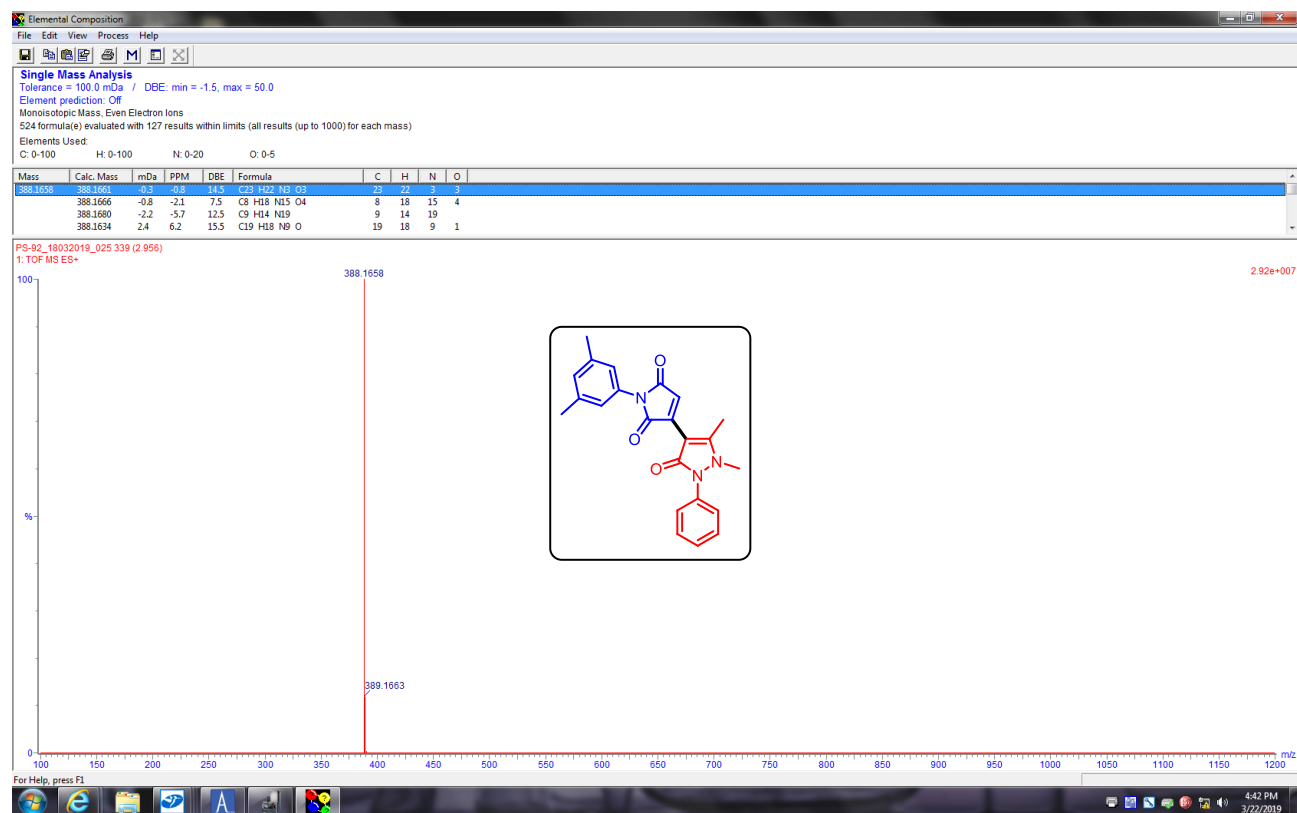

# <sup>1</sup>H and <sup>13</sup>C of Compound 3ad (500 & 125 MHz, CDCl<sub>3</sub>):

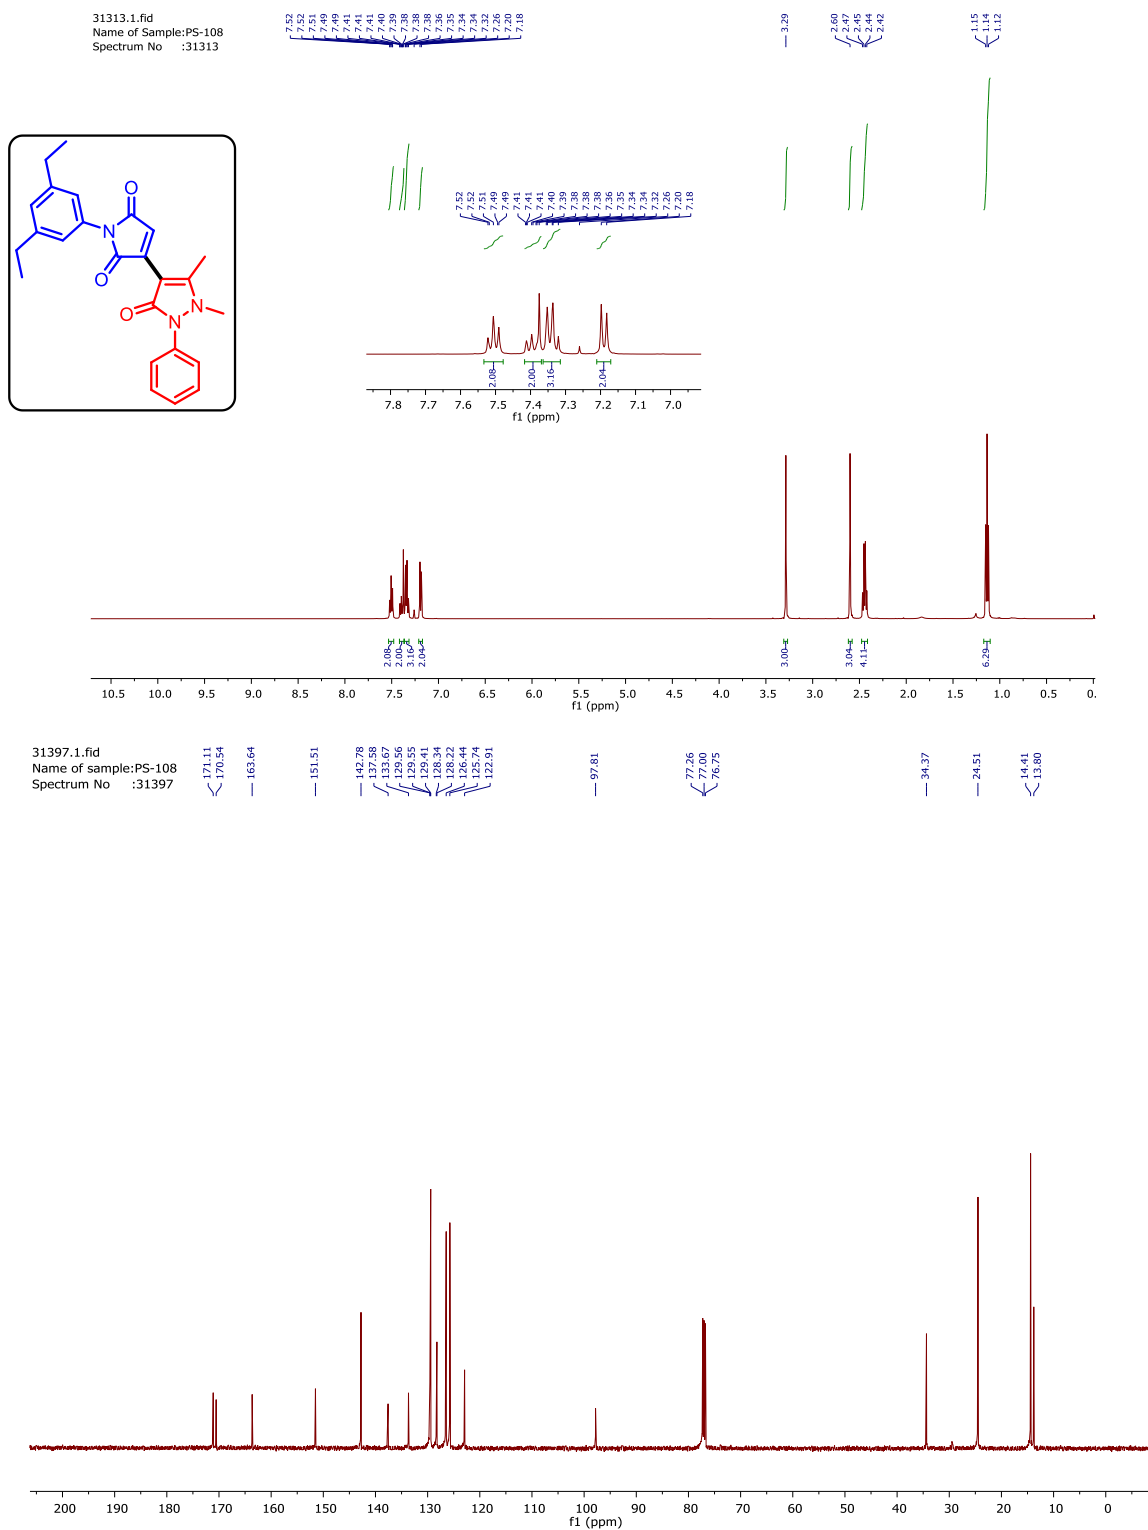

## HRMS Spectra of Compound 3ad:

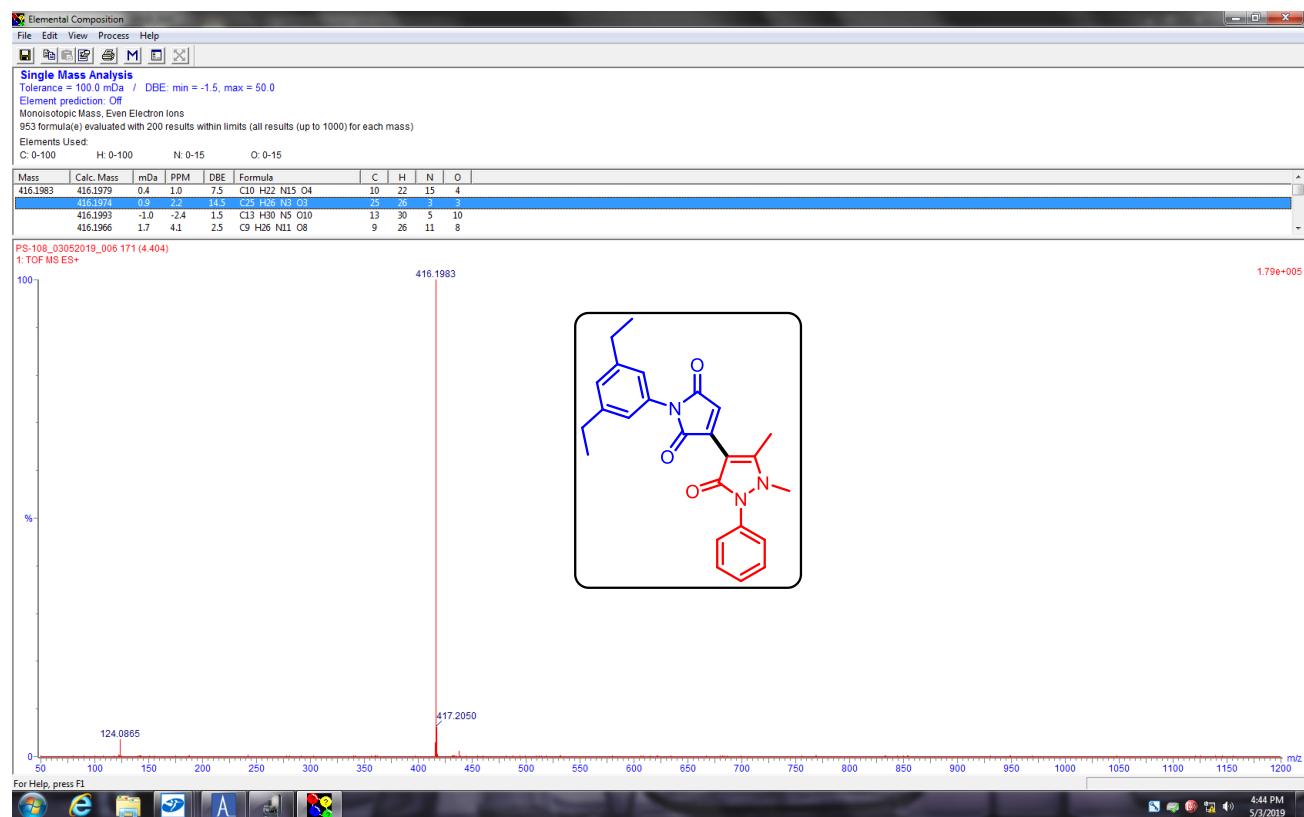

# <sup>1</sup>H and <sup>13</sup>C of Compound 3ae (500 & 125 MHz, CDCl<sub>3</sub>):

31491.1.fid  
Name of sample: SB-105  
Spectrum No : 31491

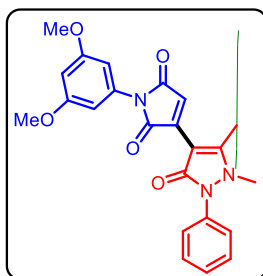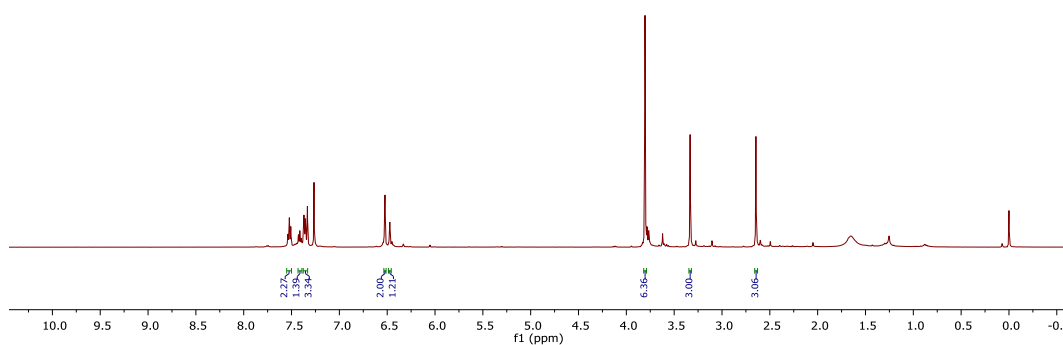

31677.1.fid  
Name of sample: SB-105  
Spectrum No : 31677

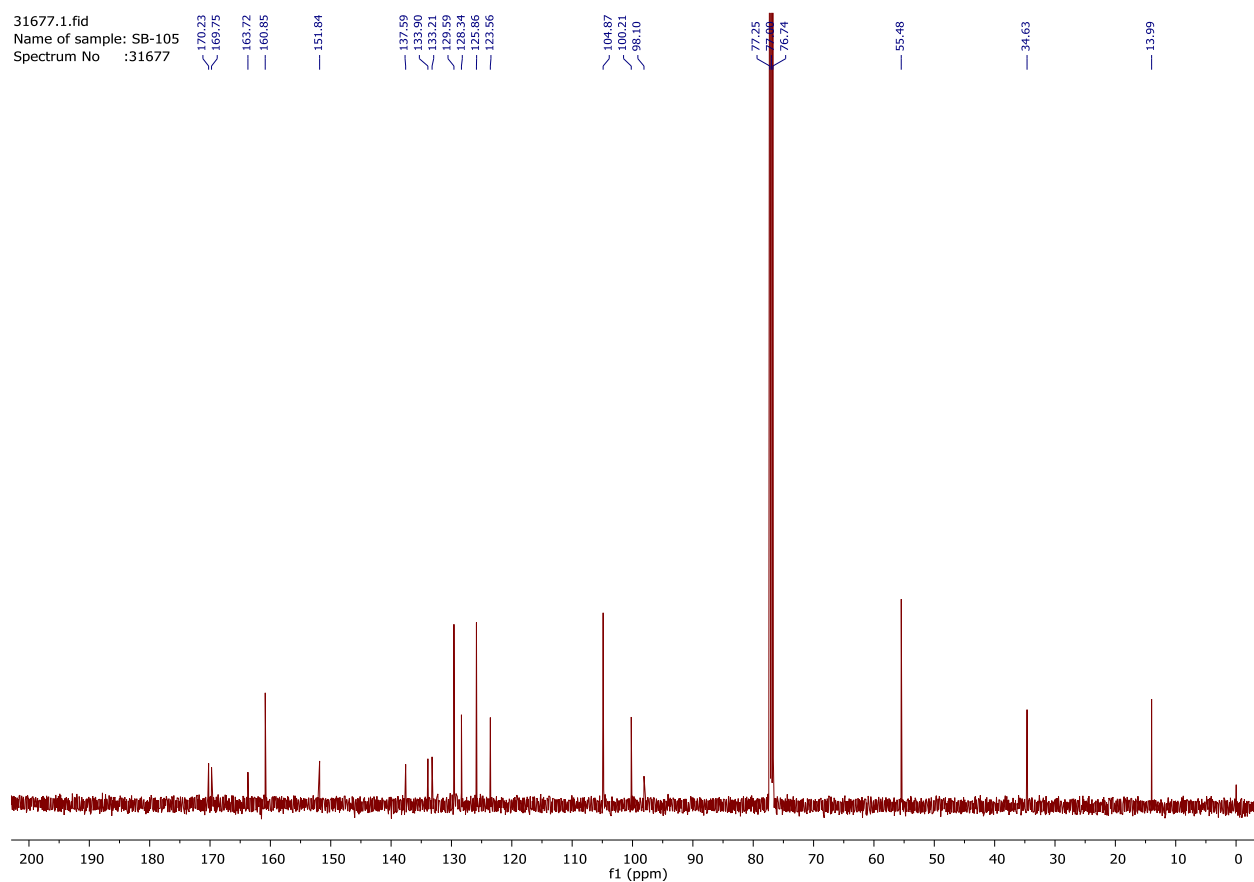



## HRMS Spectra of Compound 3ae:

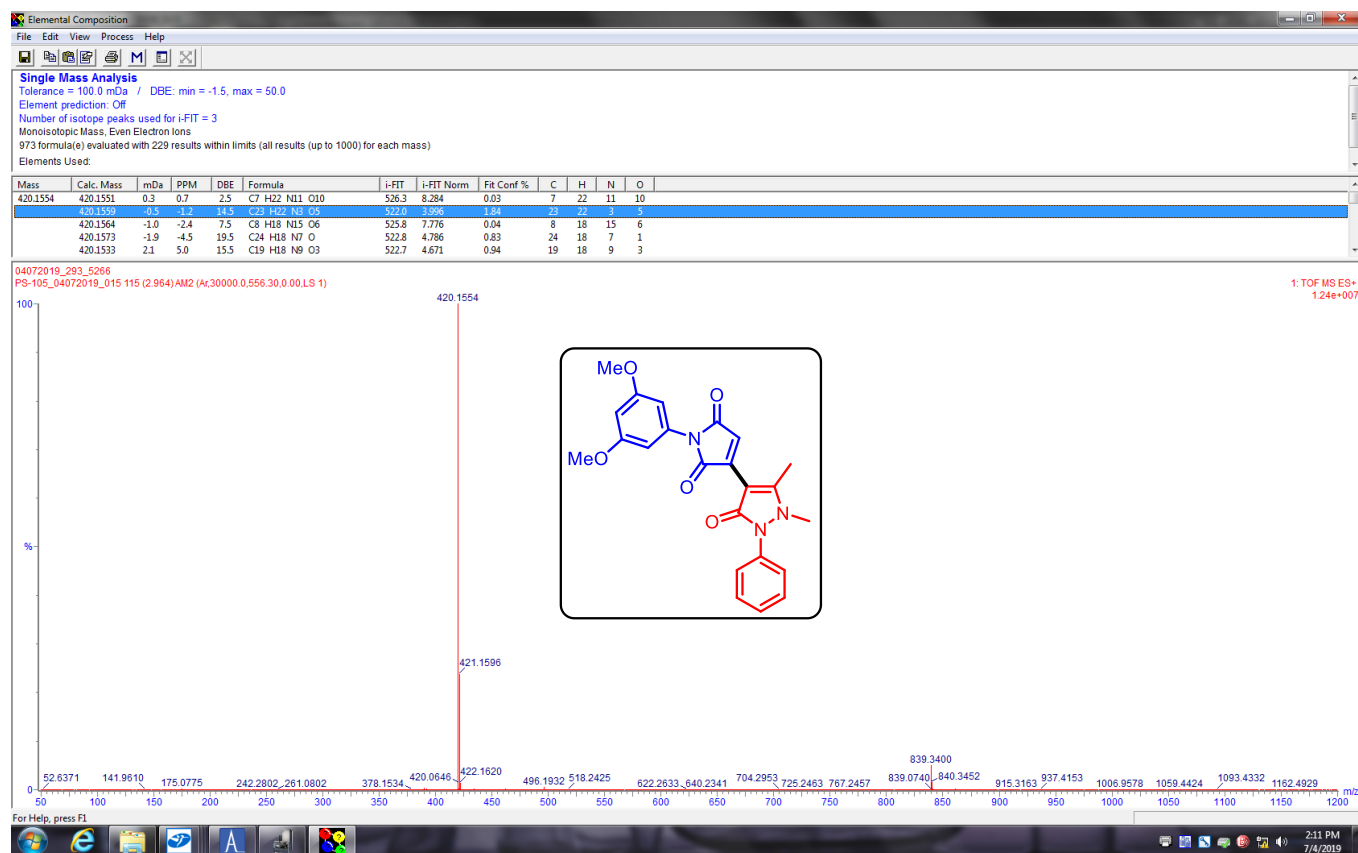

# <sup>1</sup>H and <sup>13</sup>C of Compound 3af (500 & 125 MHz, CDCl<sub>3</sub>):

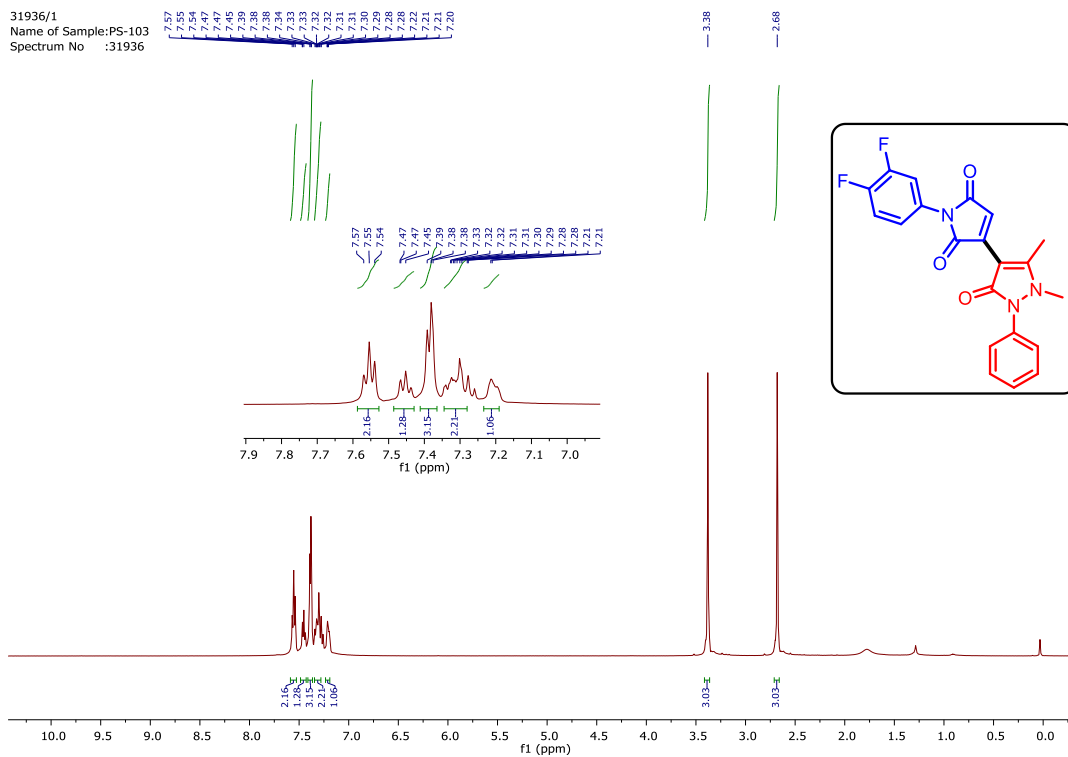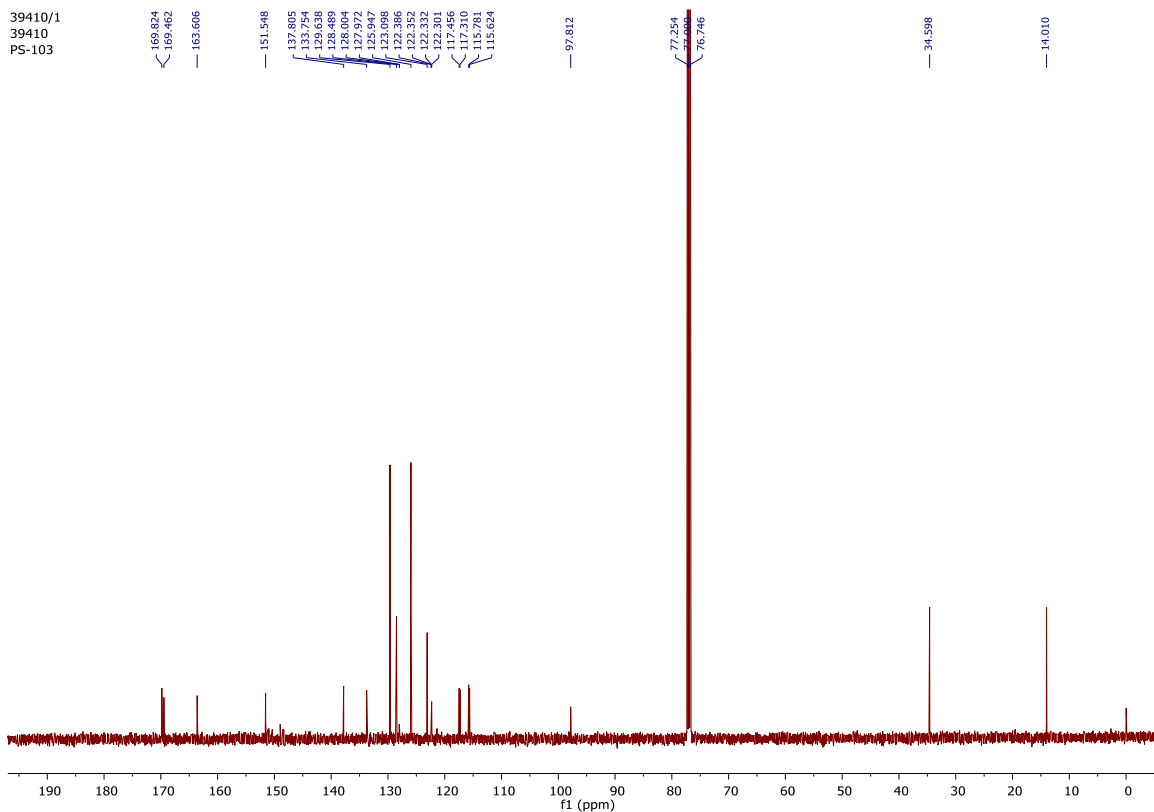

## HRMS Spectra of Compound 3af:

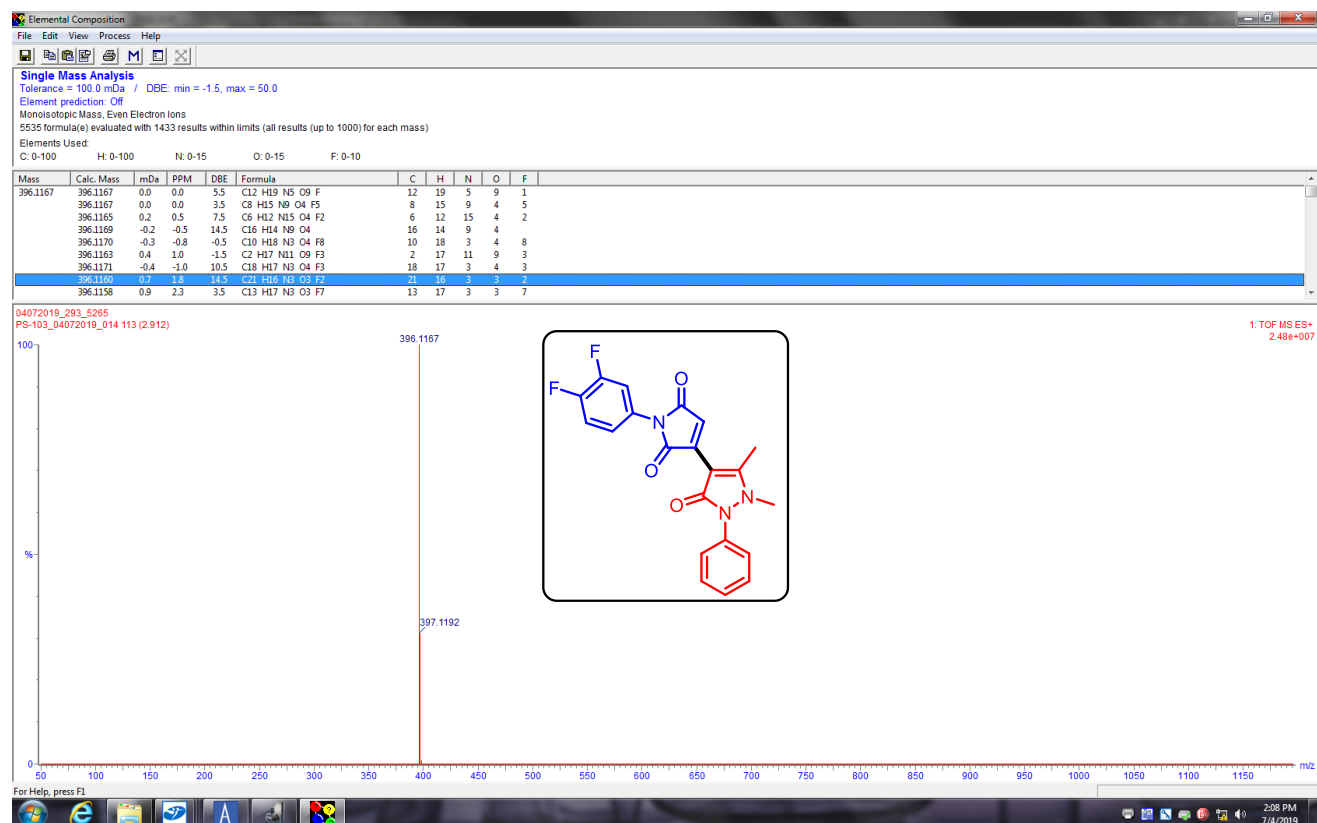

# <sup>1</sup>H and <sup>13</sup>C of Compound 3ag (500 & 125 MHz, CDCl<sub>3</sub>):

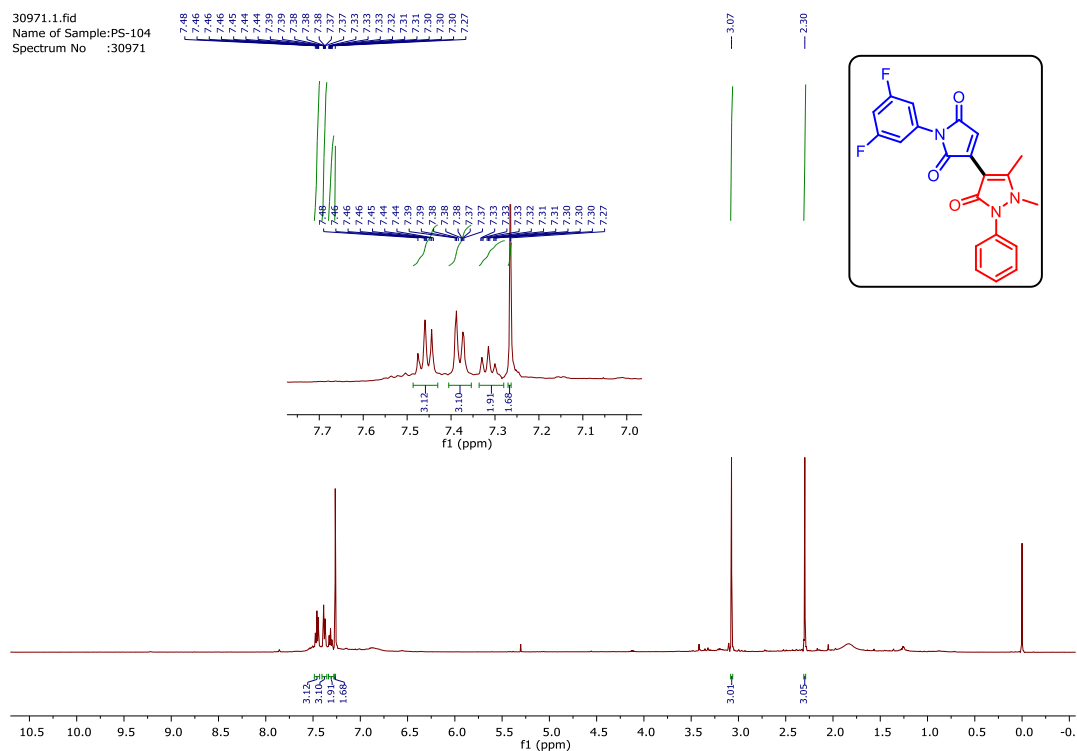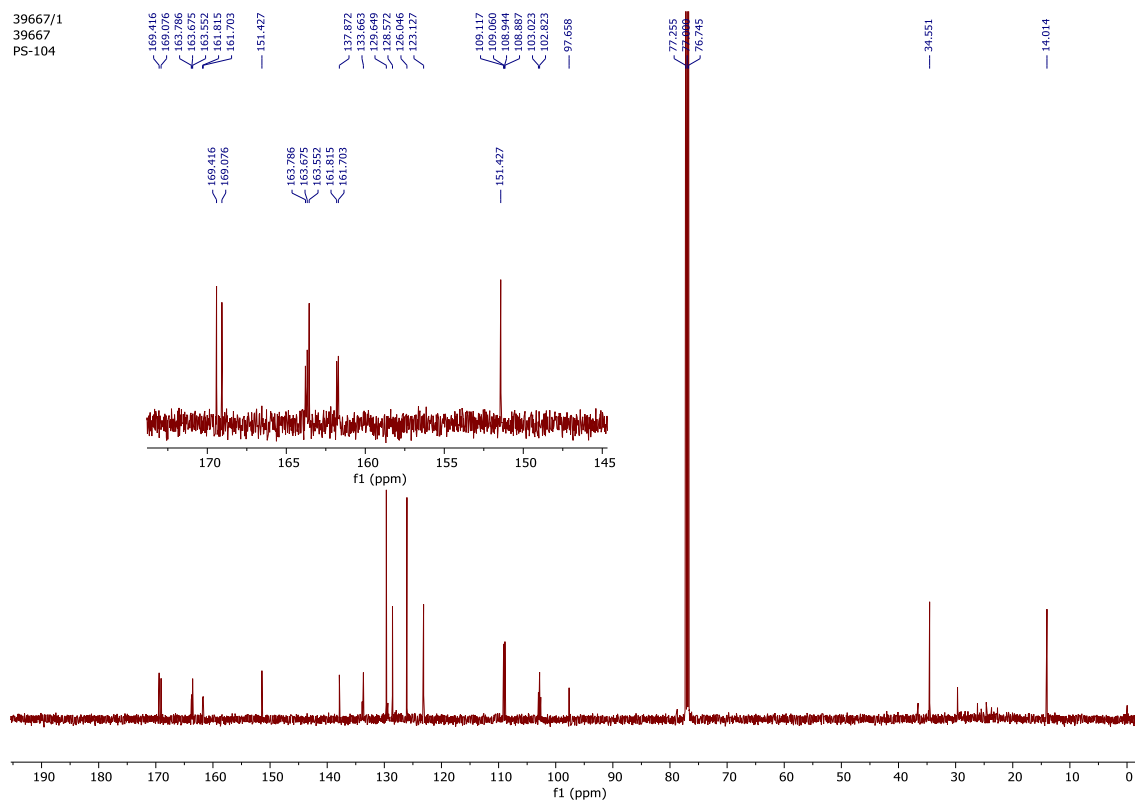

## HRMS Spectra of Compound 3ag:

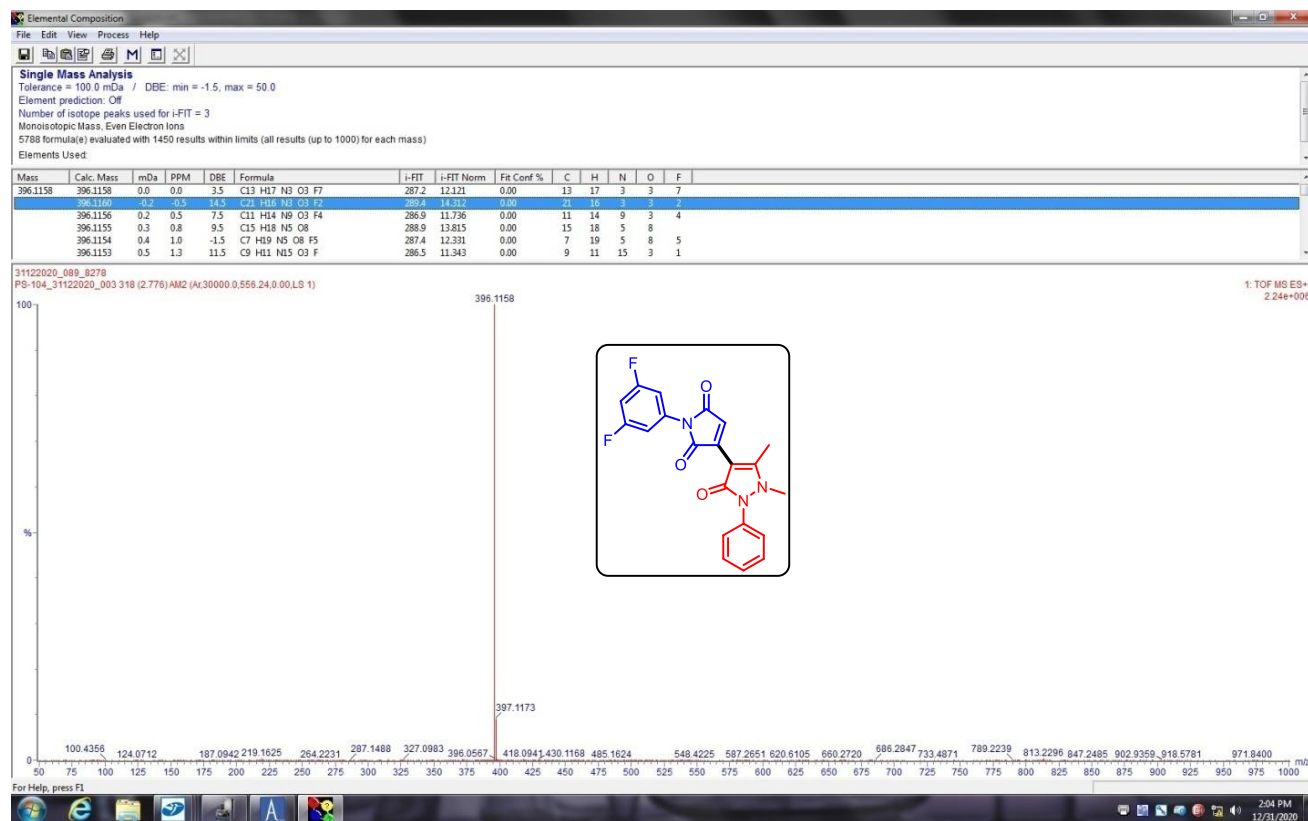

# <sup>1</sup>H and <sup>13</sup>C of Compound 3ah (500 & 125 MHz, CDCl<sub>3</sub>):

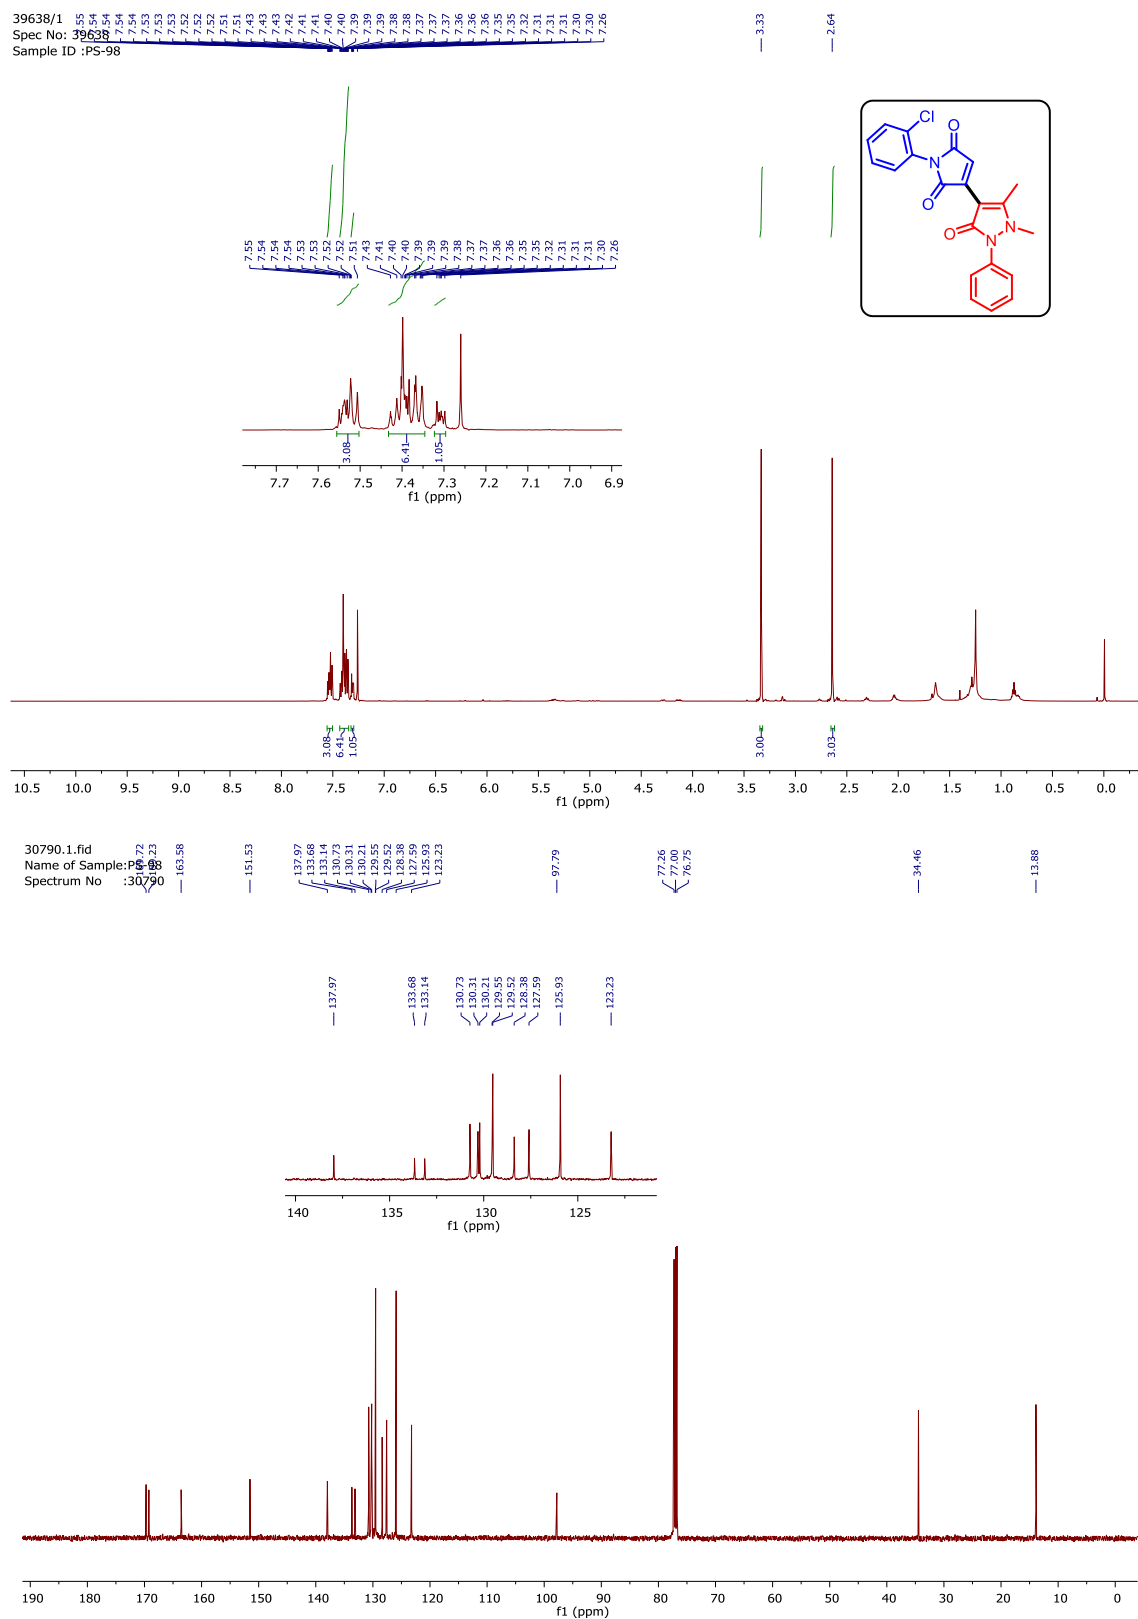

## HRMS Spectra of Compound 3ah:

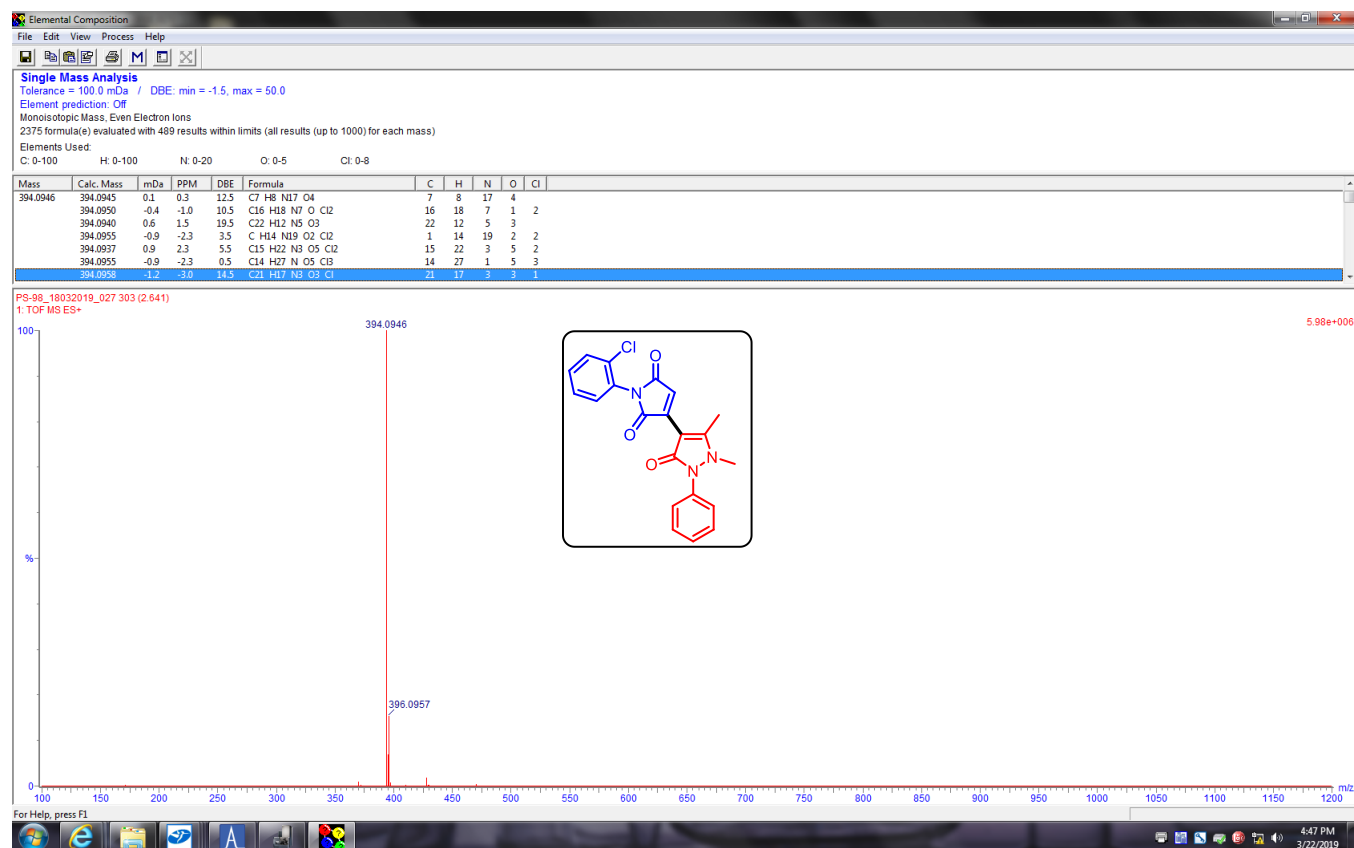

# <sup>1</sup>H and <sup>13</sup>C of Compound 3ai (500 & 125 MHz, CDCl<sub>3</sub>):

30547.1.fid  
Name of Sample:PS-97  
Spectrum No :30547

7.53  
7.51  
7.50  
7.44  
7.43  
7.42  
7.41  
7.39  
7.35  
7.34  
7.34  
7.34  
7.26

3.33

2.64

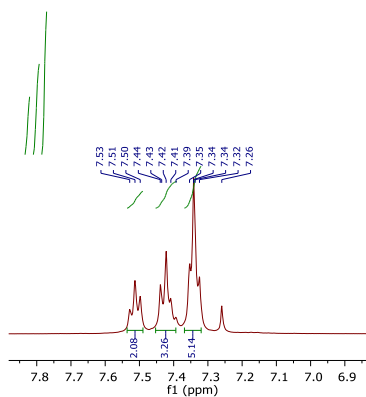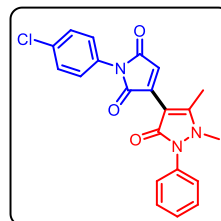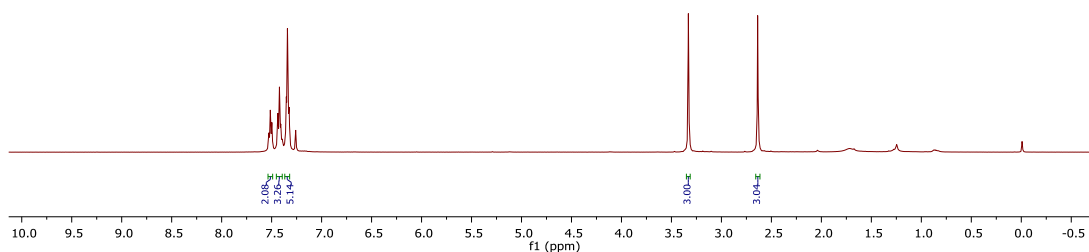

30932.1.fid  
Name of Sample:PS-97  
Spectrum No :30932

170.02  
169.35  
163.58

151.54

137.77  
133.73  
133.17  
130.24  
129.57  
129.13  
128.40  
127.34  
125.91  
123.13

97.80

77.25  
77.00  
76.75

34.54

13.95

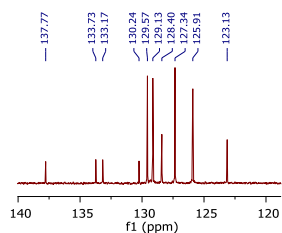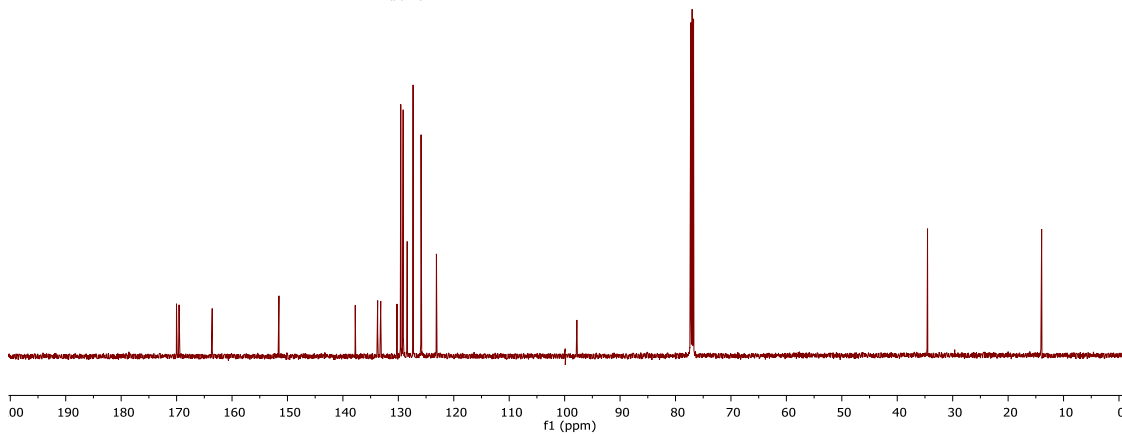



## HRMS Spectra of Compound 3ai:

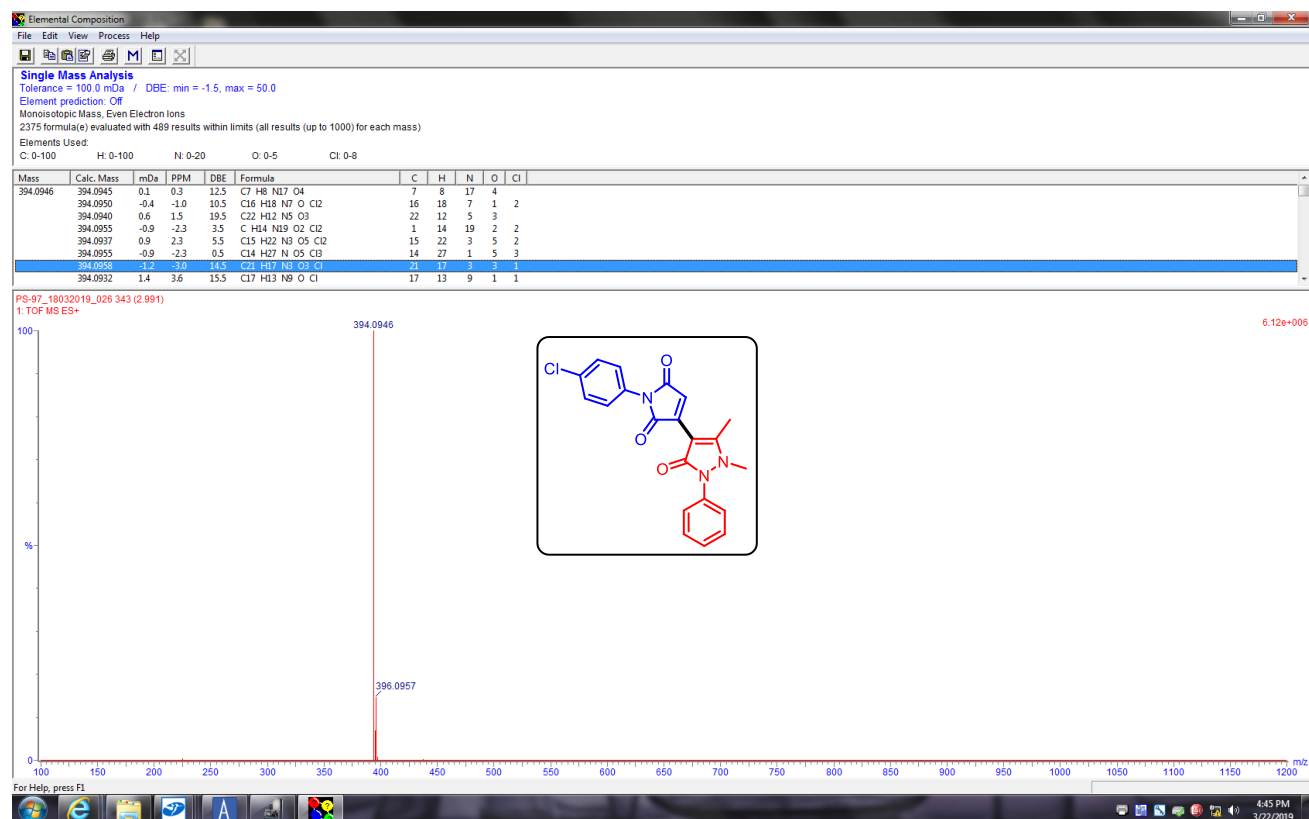

30643.1.fid  
Name of Sample:SB-100  
Spectrum No :30643

7.58  
7.57  
7.52  
7.50  
7.49  
7.49  
7.48  
7.41  
7.36  
7.35  
7.35  
7.26

Chemical structure of compound 30643.1.fid: BrC1=CC=C(C=C1)N2C(=O)C=C(C2[C@H]3C(=O)N(C4=CC=CC=C4)C3)C5=CC=CC=C5

Chemical structure of compound 30783.1.fid: BrC1=CC=C(C=C1)N2C(=O)C=C(C2[C@H]3C(=O)N(C4=CC=CC=C4)C3)C5=CC=CC=C5

30783.1.fid  
Name of Sample:PS-100  
Spectrum No :30783

169.84  
169.42  
163.58

151.49

137.76  
137.76  
137.70  
133.97  
130.58  
130.19  
129.61  
129.09  
128.49  
126.00  
126.00  
124.73  
123.19  
122.27

97.78

77.25  
76.75

34.54

## HRMS Spectra of Compound 3aj:

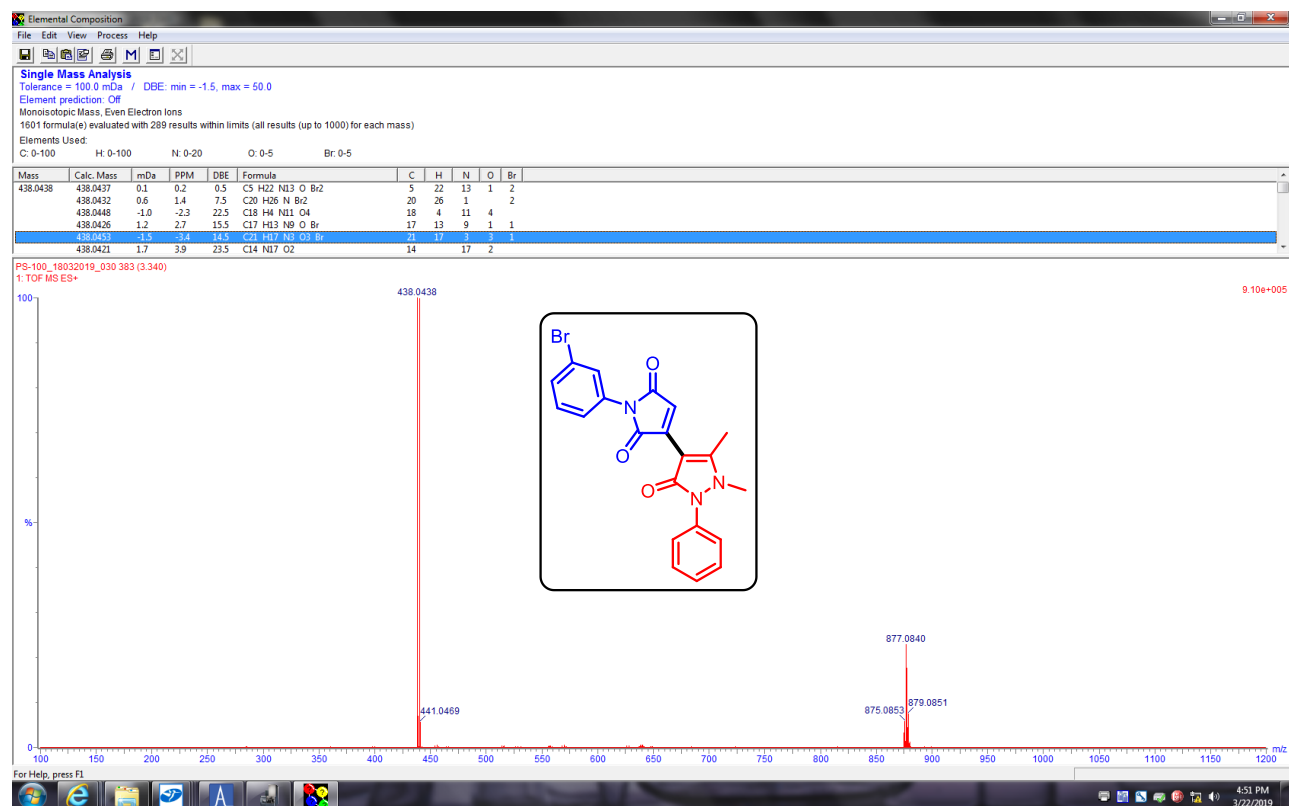

# <sup>1</sup>H and <sup>13</sup>C of Compound 3ak (500 & 125 MHz, CDCl<sub>3</sub>):

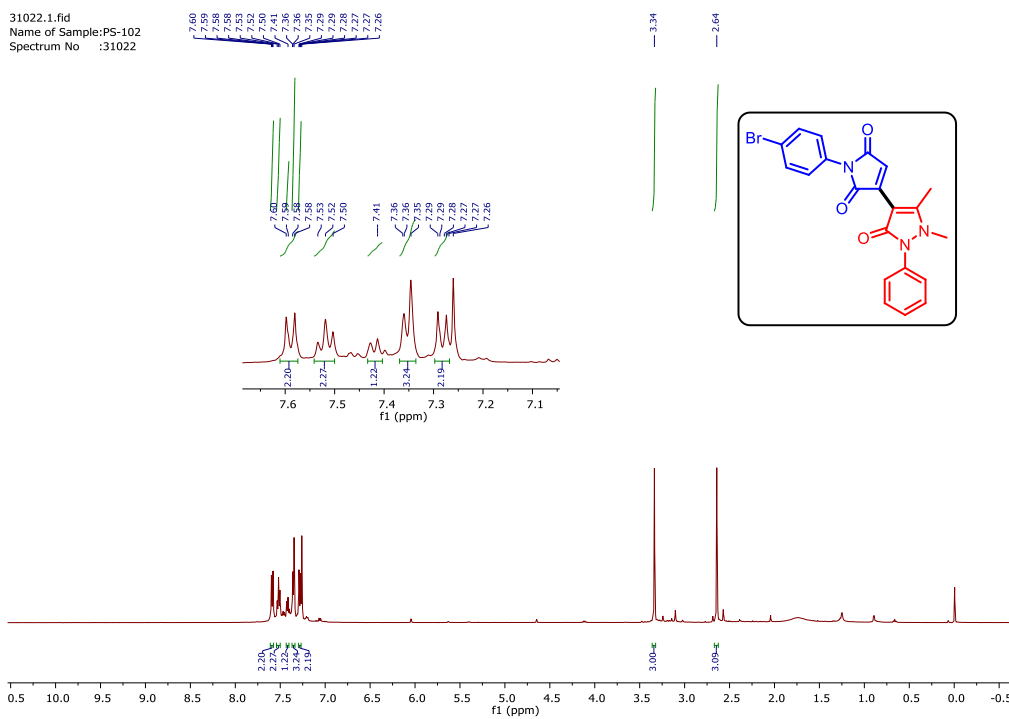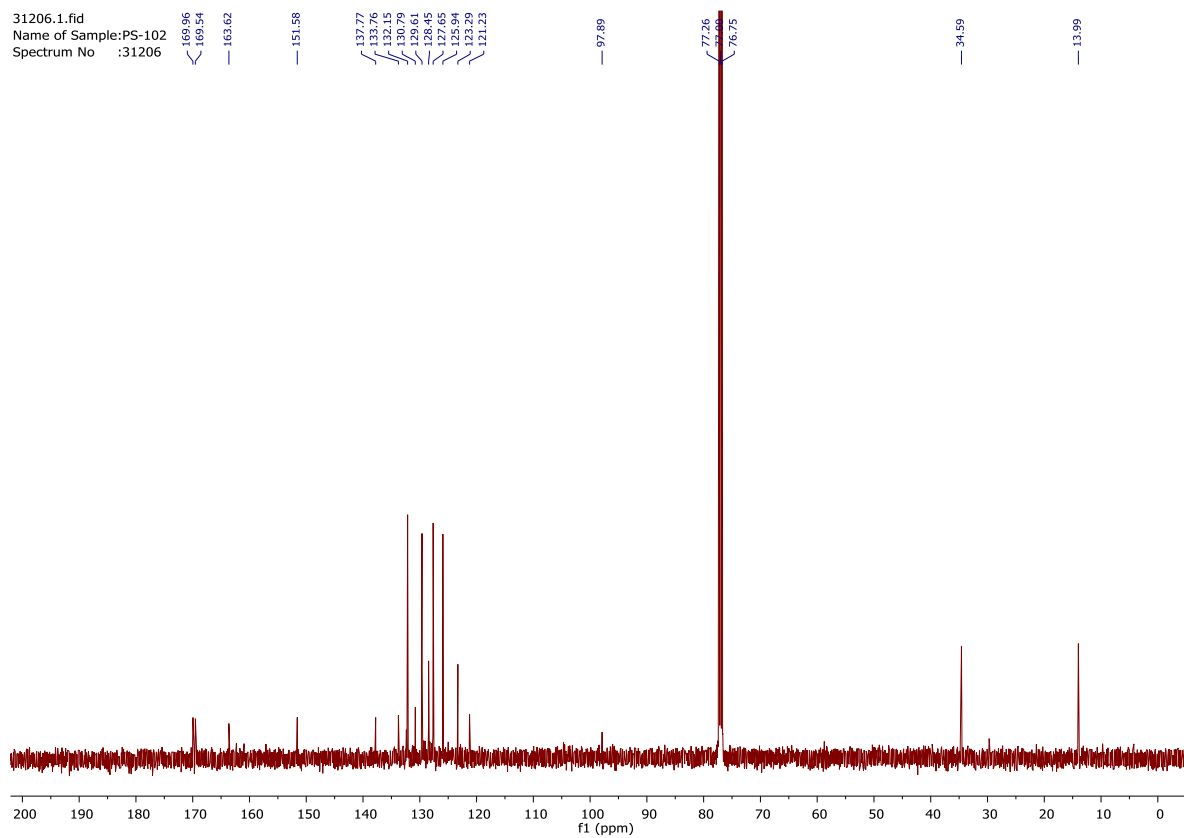

## HRMS Spectra of Compound 3ak:

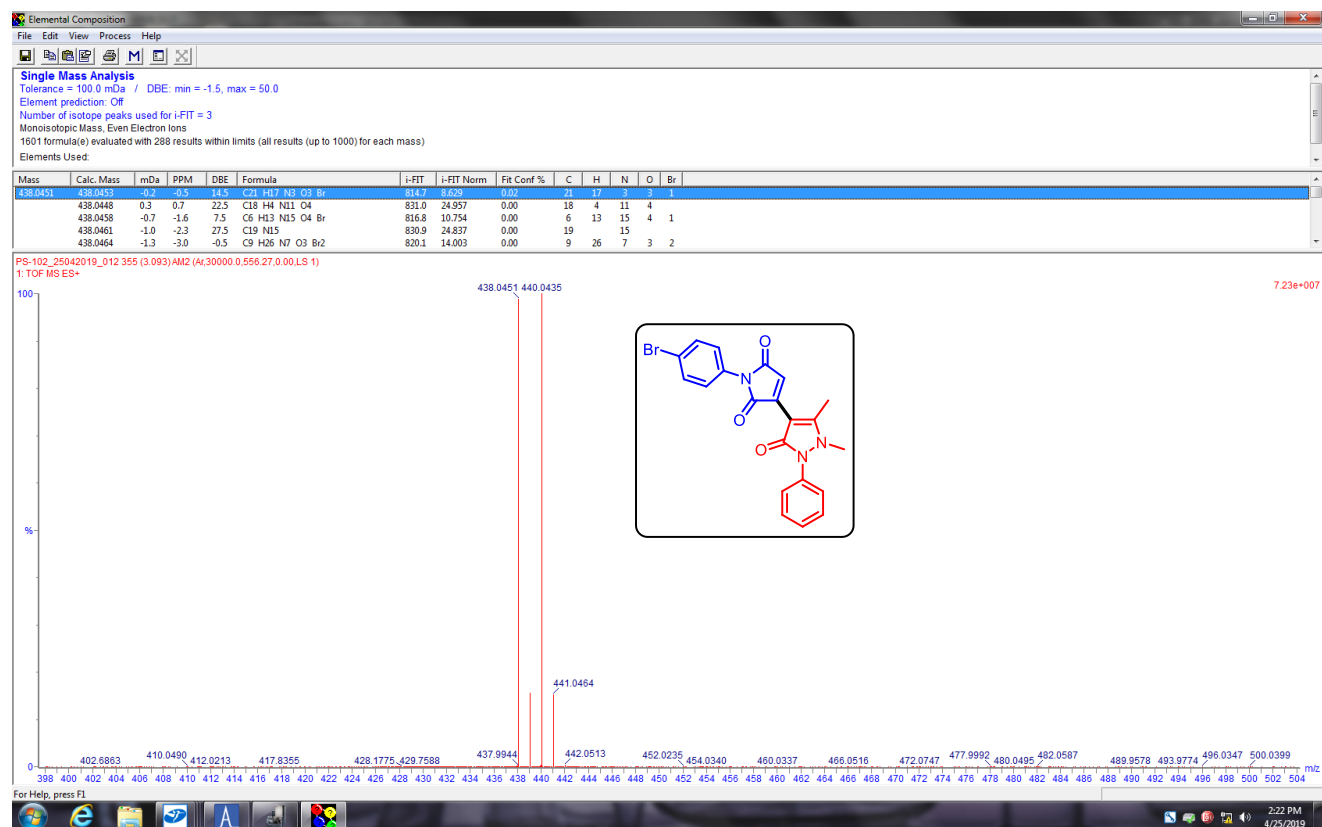

# <sup>1</sup>H and <sup>13</sup>C of Compound 3aI (500 & 125 MHz, CDCl<sub>3</sub>):

31970/1  
Name of Sample:PS-107  
Spectrum No :31970

7.71  
7.62  
7.61  
7.60  
7.58  
7.52  
7.50  
7.44  
7.43  
7.38  
7.36  
7.35  
7.28

3.34

2.65

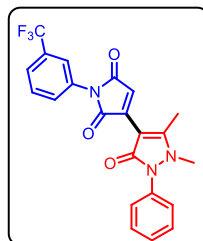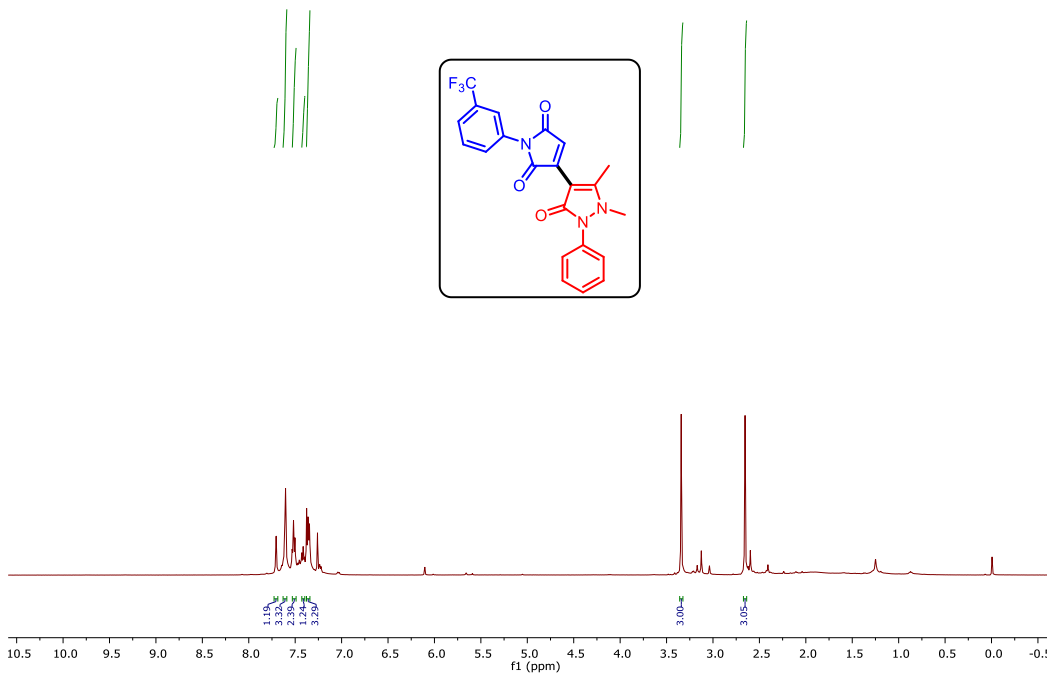

32130/1  
Name of sample:PS-107  
Spectrum No :32130

169.81  
169.41  
163.60

151.51  
147.77  
133.72  
132.39  
131.29  
129.52  
129.26  
128.51  
126.01  
125.04  
124.68  
124.13  
123.15  
122.96  
122.93

97.77

34.55

13.99

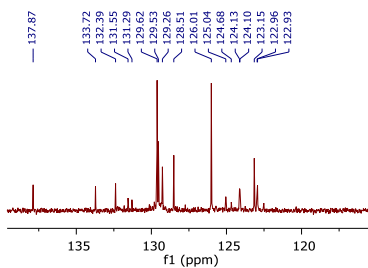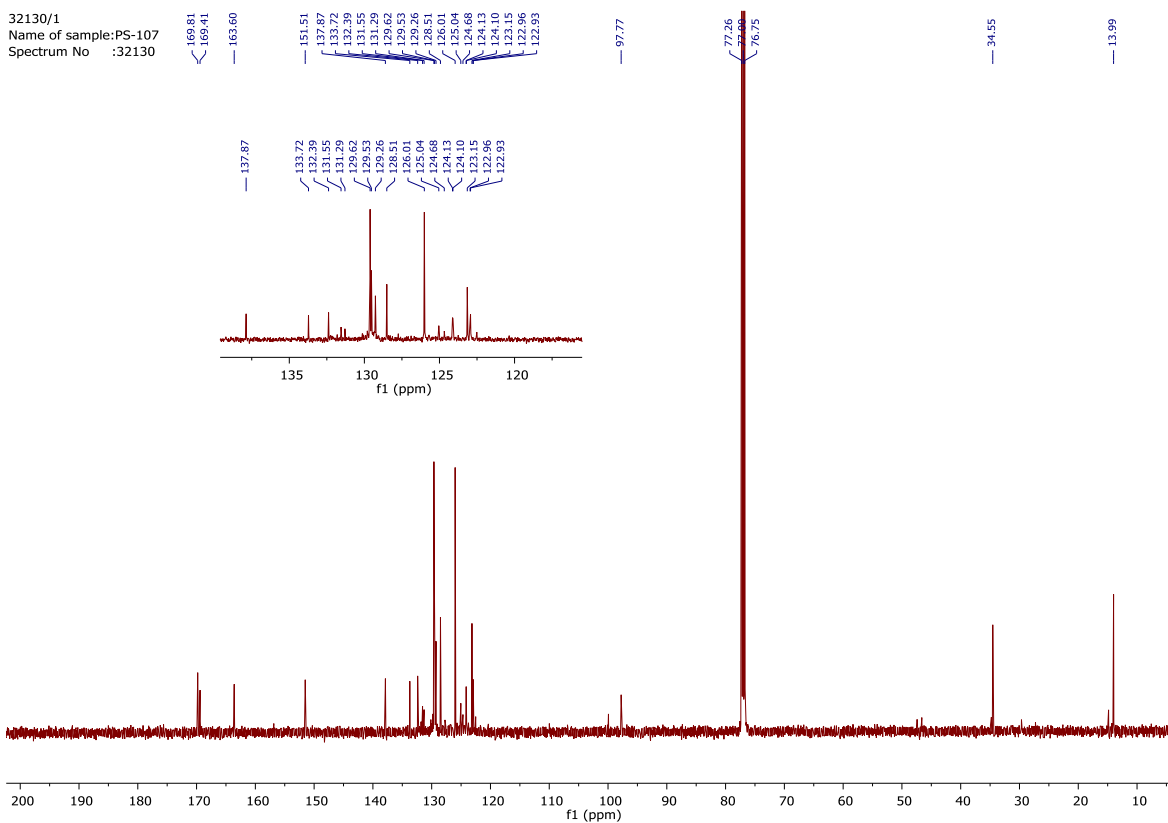

## HRMS Spectra of Compound 3al:

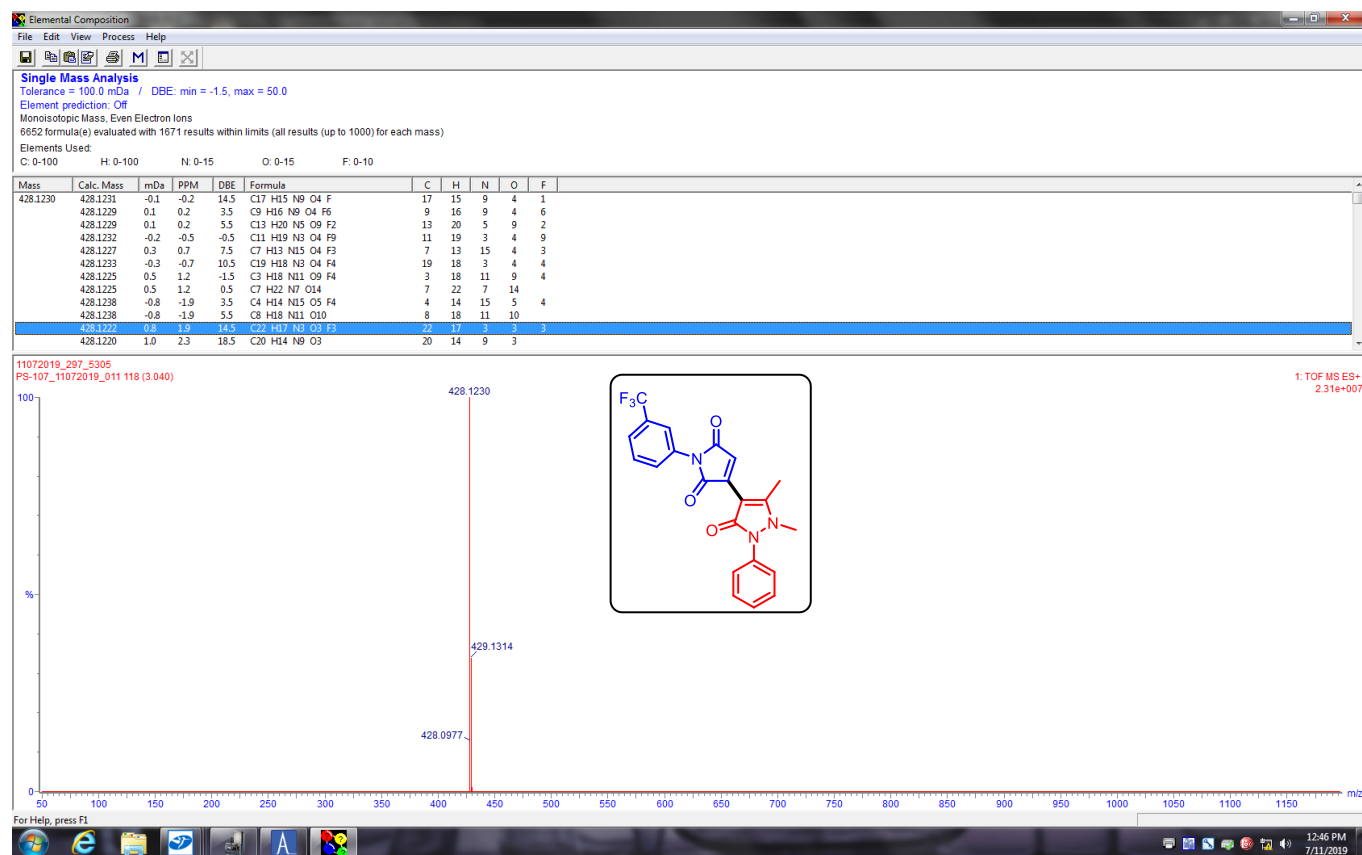

# <sup>1</sup>H and <sup>13</sup>C of Compound 3am (500 & 100 MHz, CDCl<sub>3</sub>):

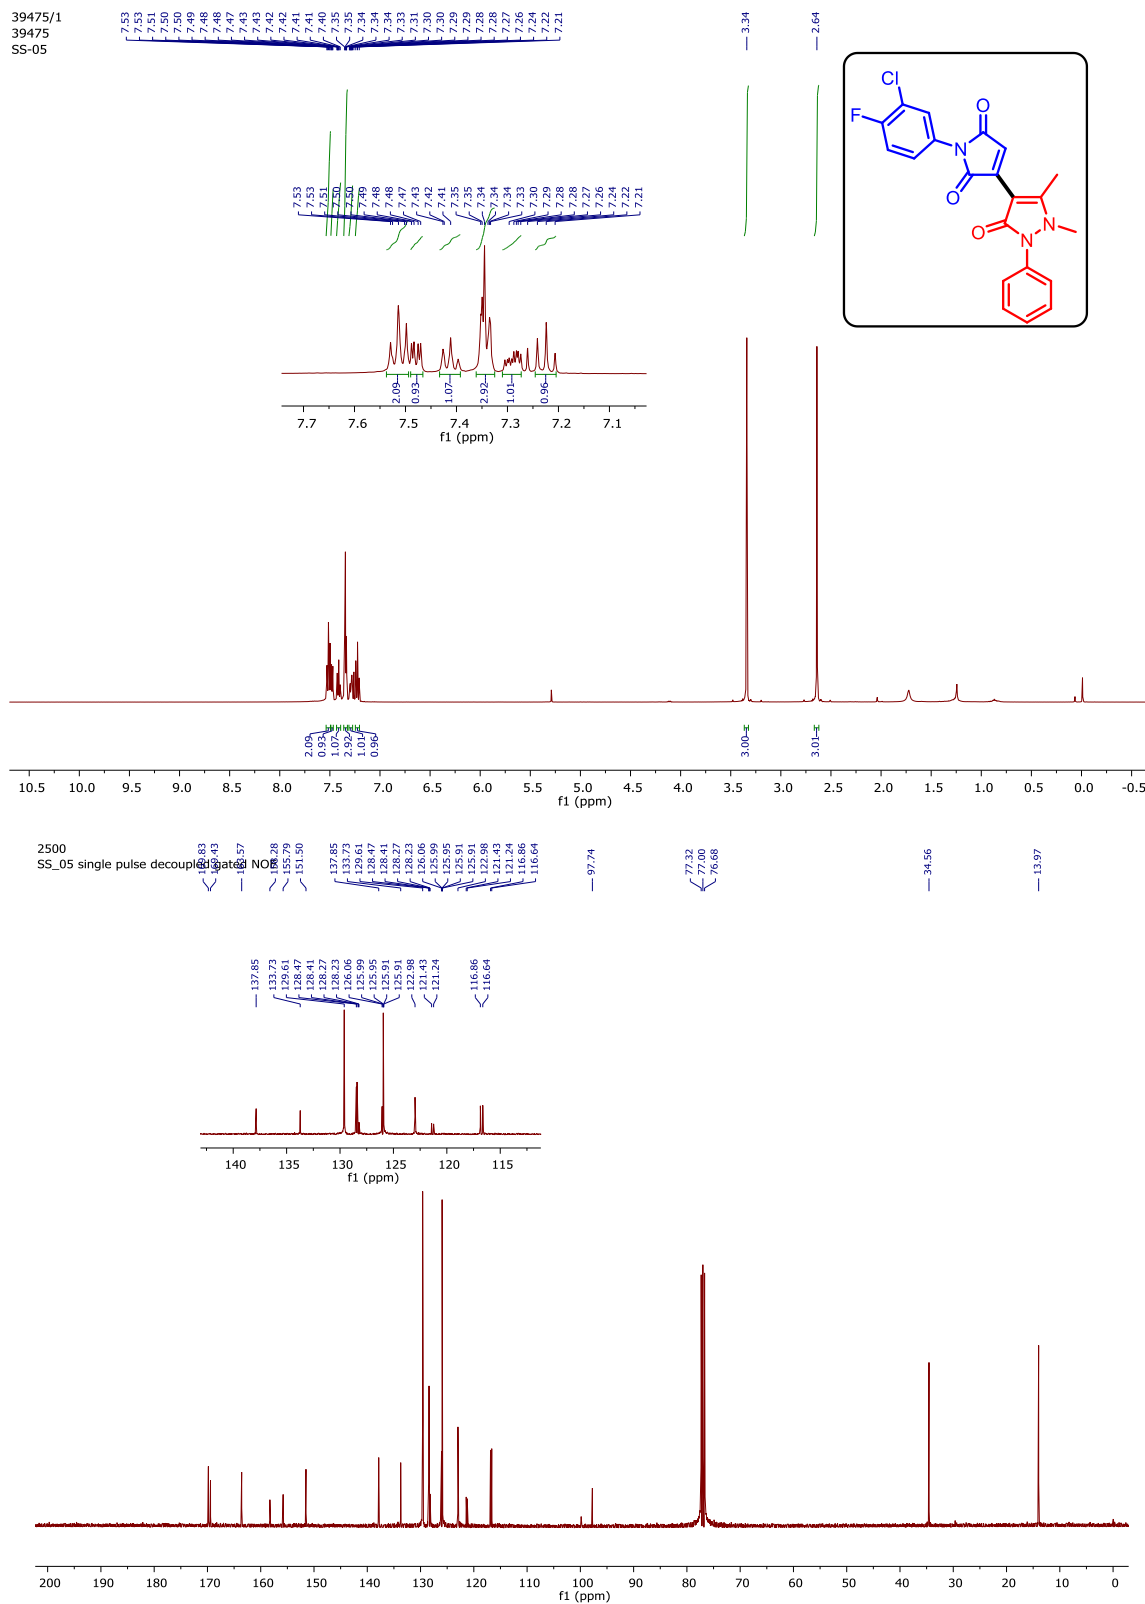



**$^{19}\text{F}$  NMR of Compound 3am (376 MHz,  $\text{CDCl}_3$ ):**

39476/1  
39476  
SS-05

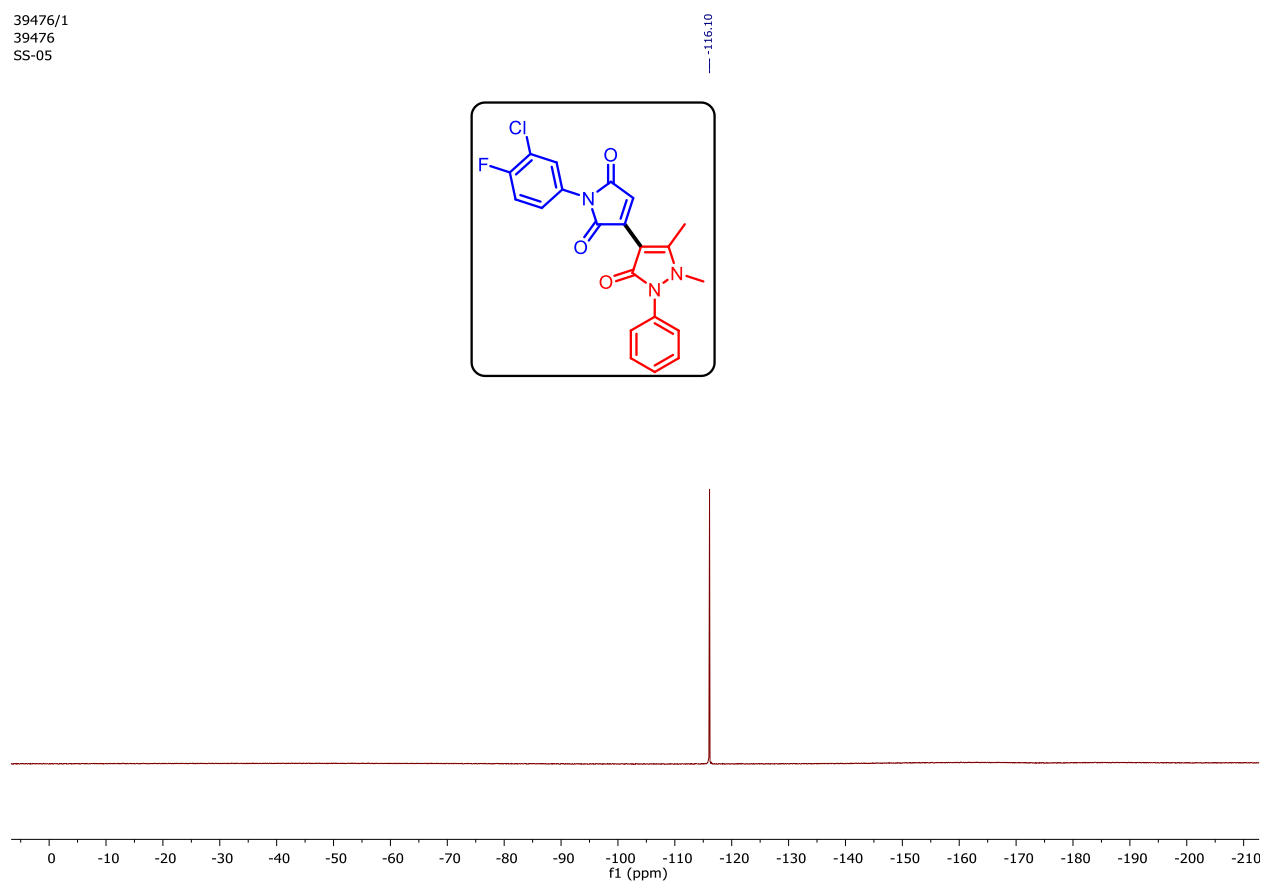

## HRMS Spectra of Compound 3am:

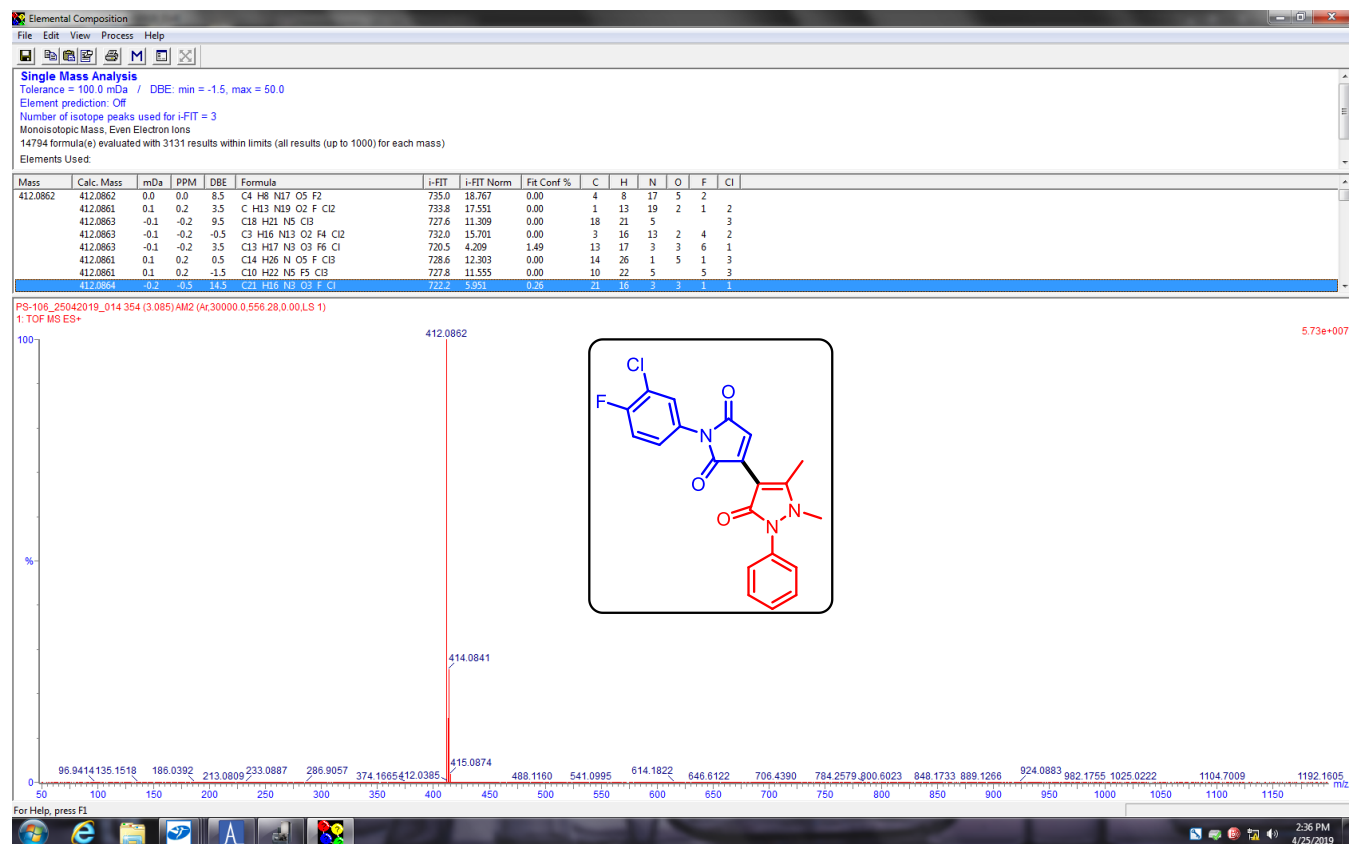

**$^1\text{H}$  and  $^{13}\text{C}$  of Compound 3an (400 & 100 MHz,  $\text{CDCl}_3$ ):**

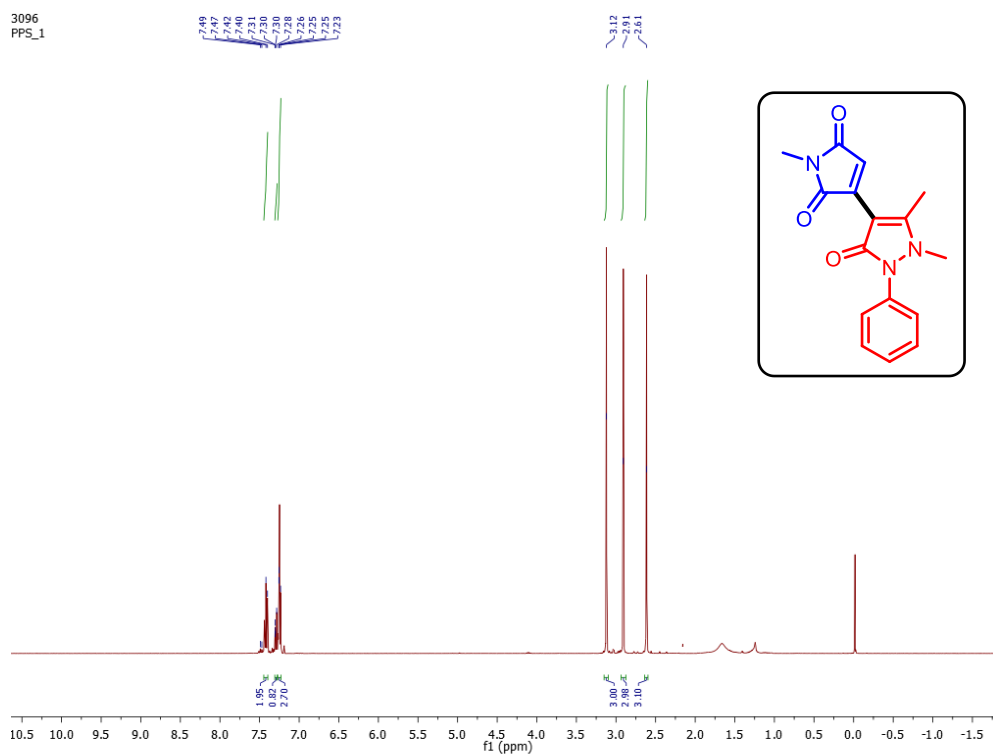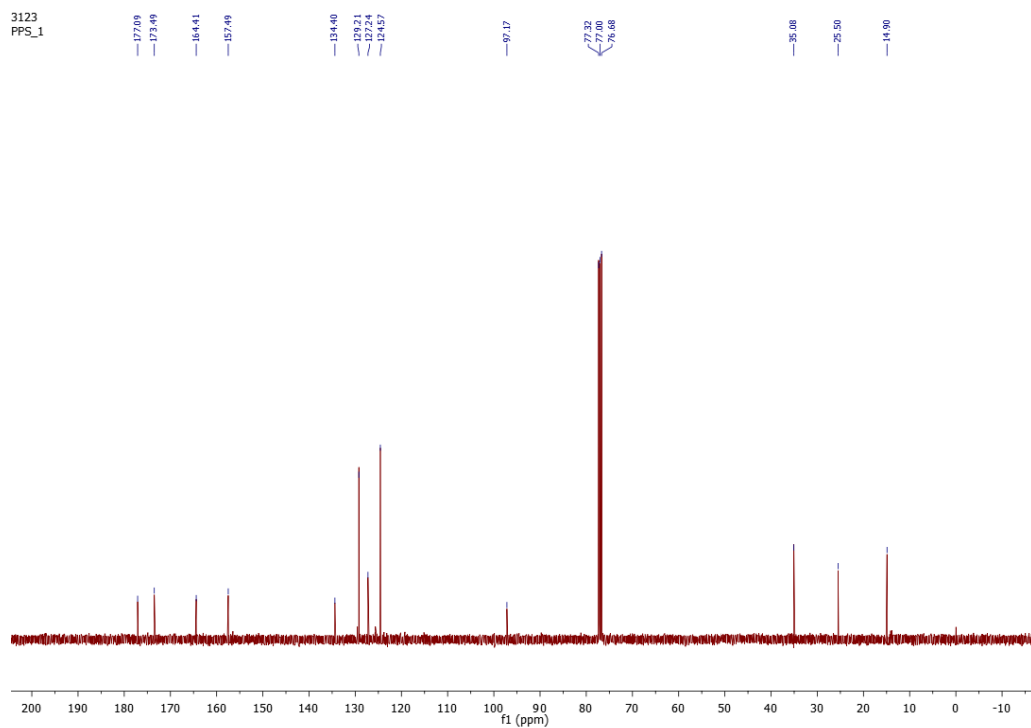

## HRMS Spectra of Compound 3an:

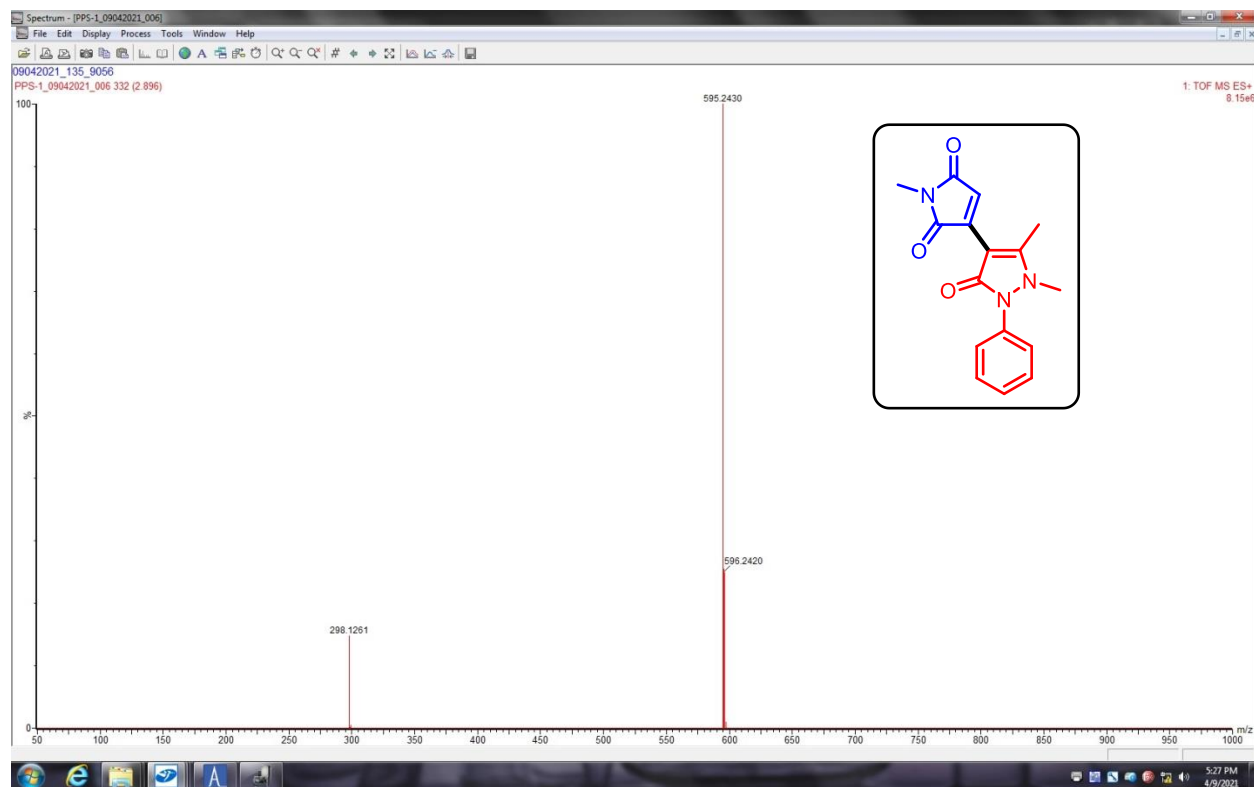

# <sup>1</sup>H and <sup>13</sup>C of Compound 3aa' (500 & 125 MHz, CDCl<sub>3</sub>):

39331/1  
39331  
PS-193

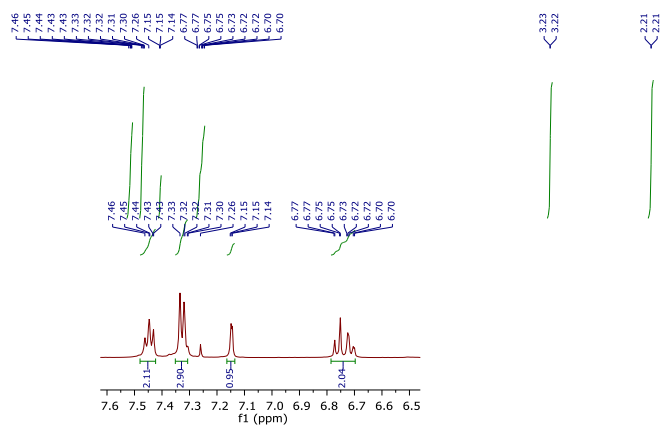

39332/1  
39332  
PS-193

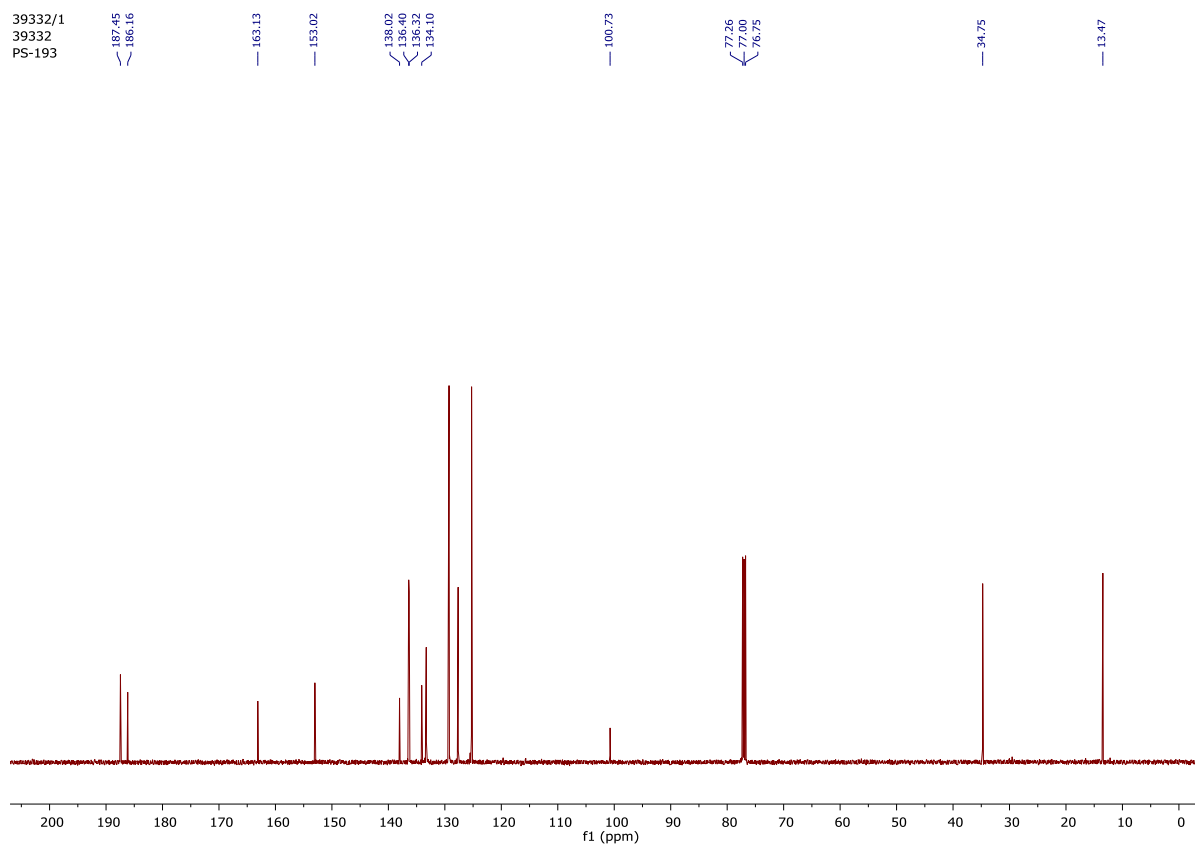

## HRMS Spectra of Compound 3aa:

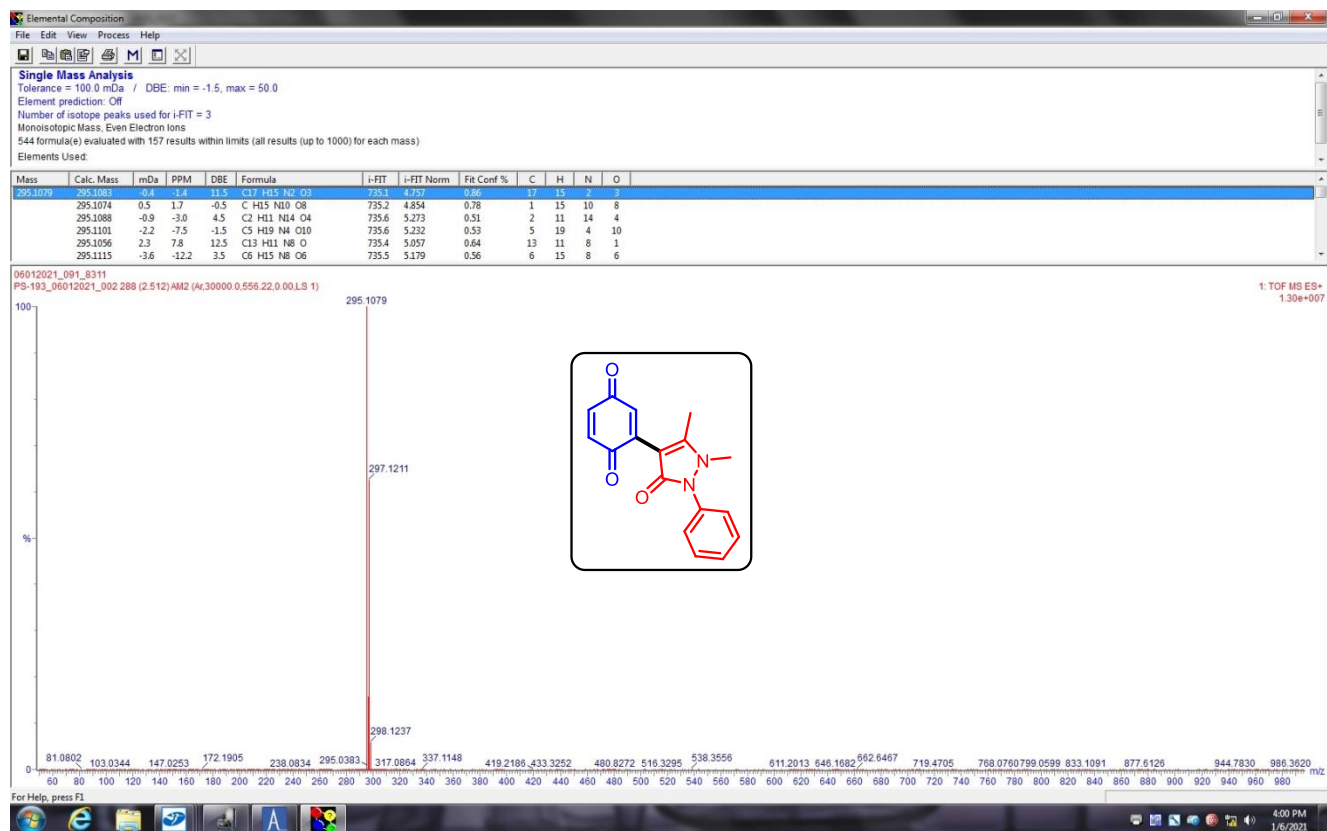

**$^1\text{H}$  and  $^{13}\text{C}$  of Compound 3ab' (500 & 125 MHz,  $\text{CDCl}_3$ ):**

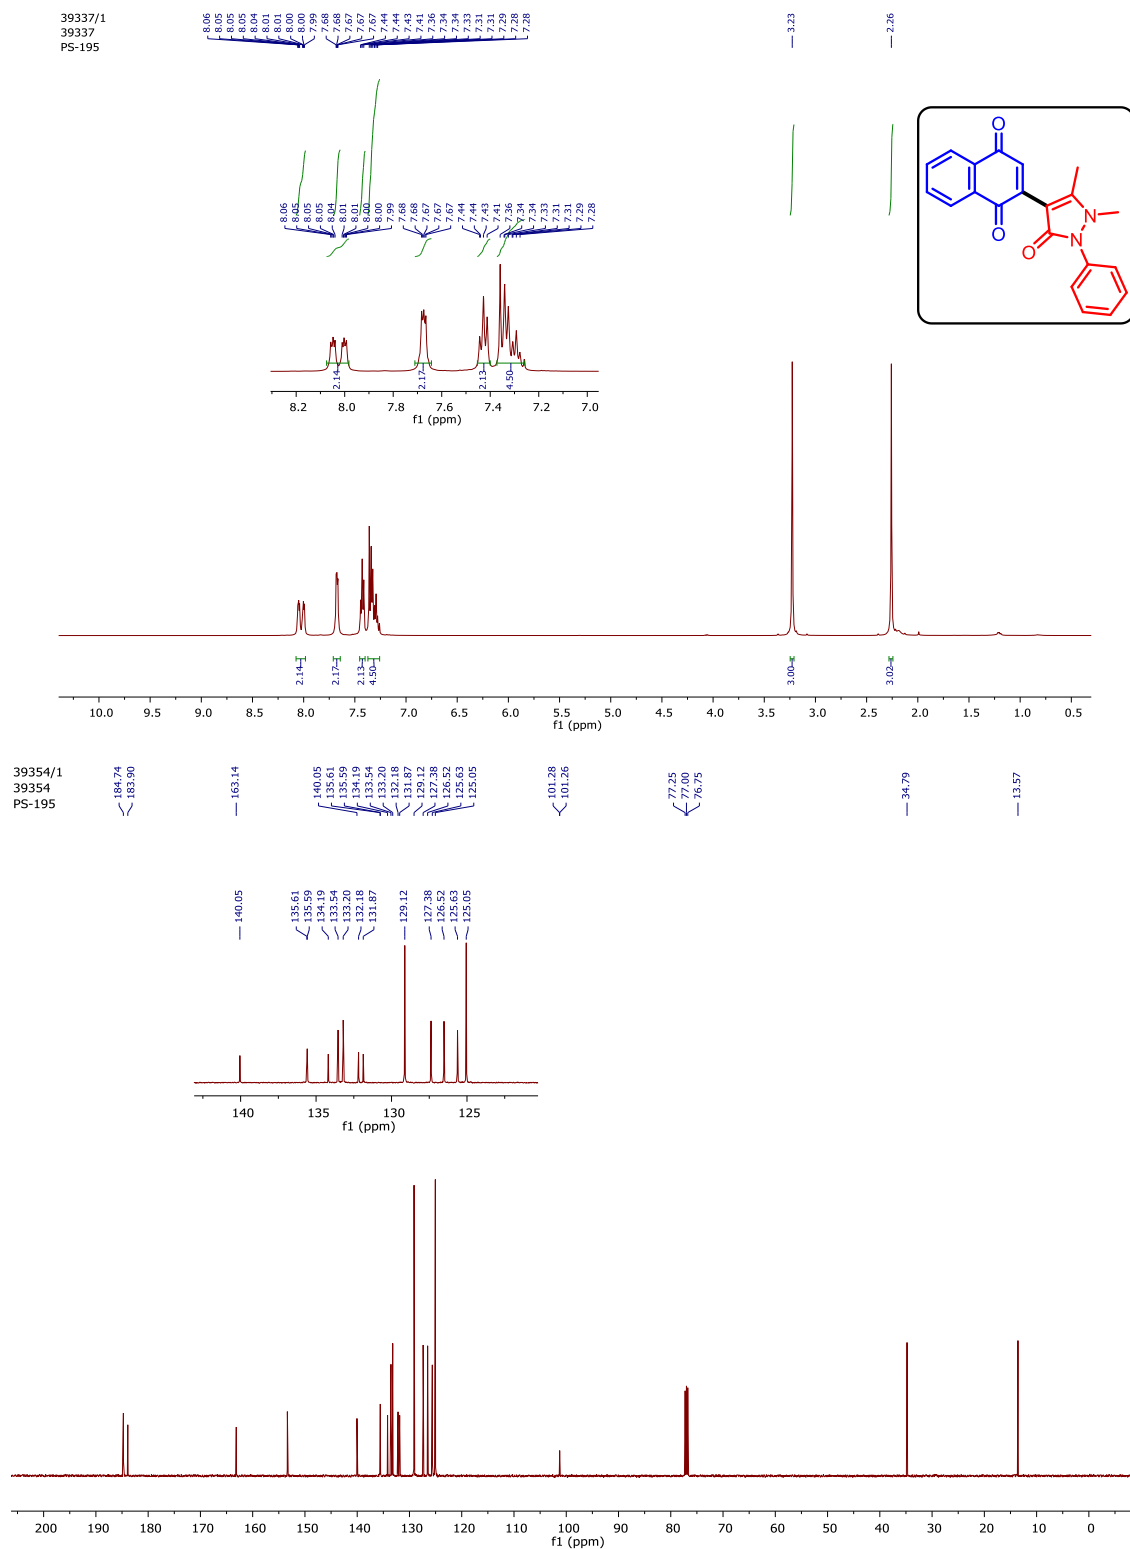

## HRMS Spectra of Compound 3ab'

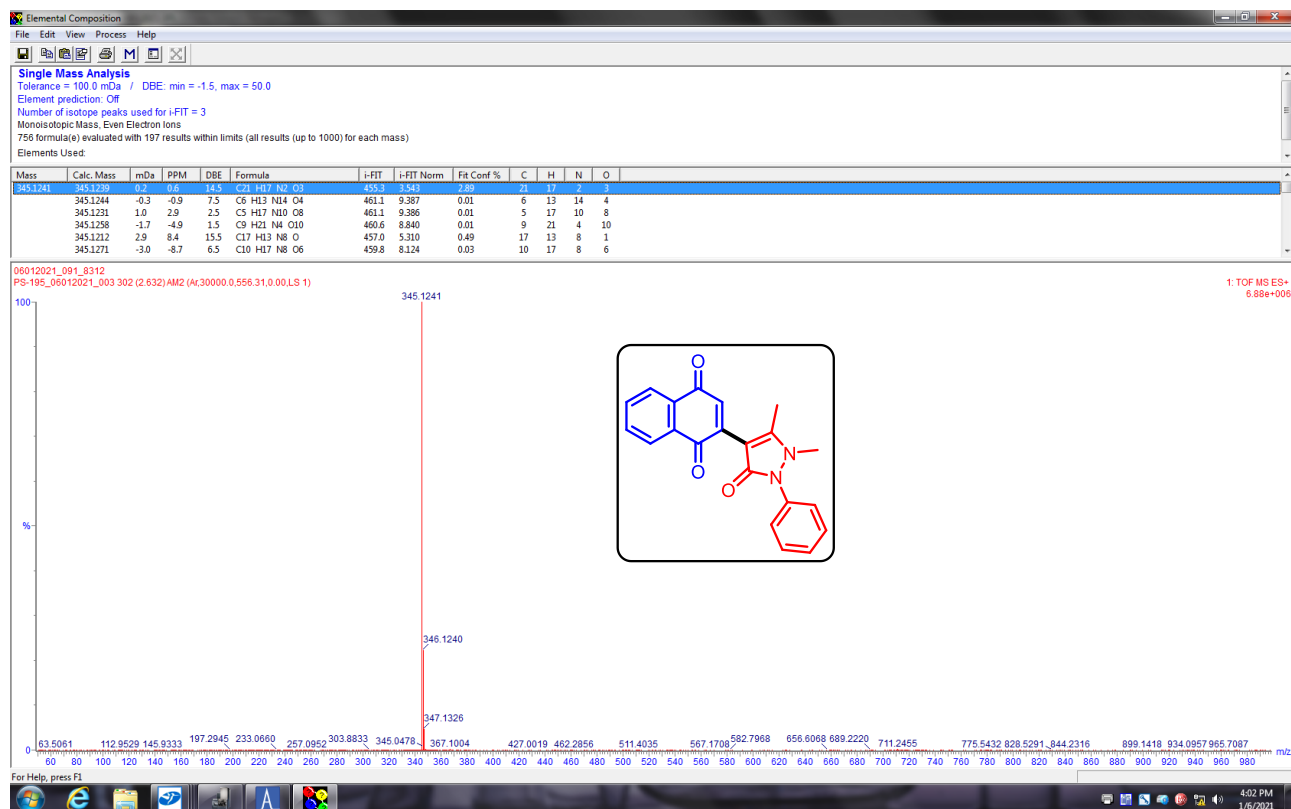



3276  
PPS\_D2O\_2ND

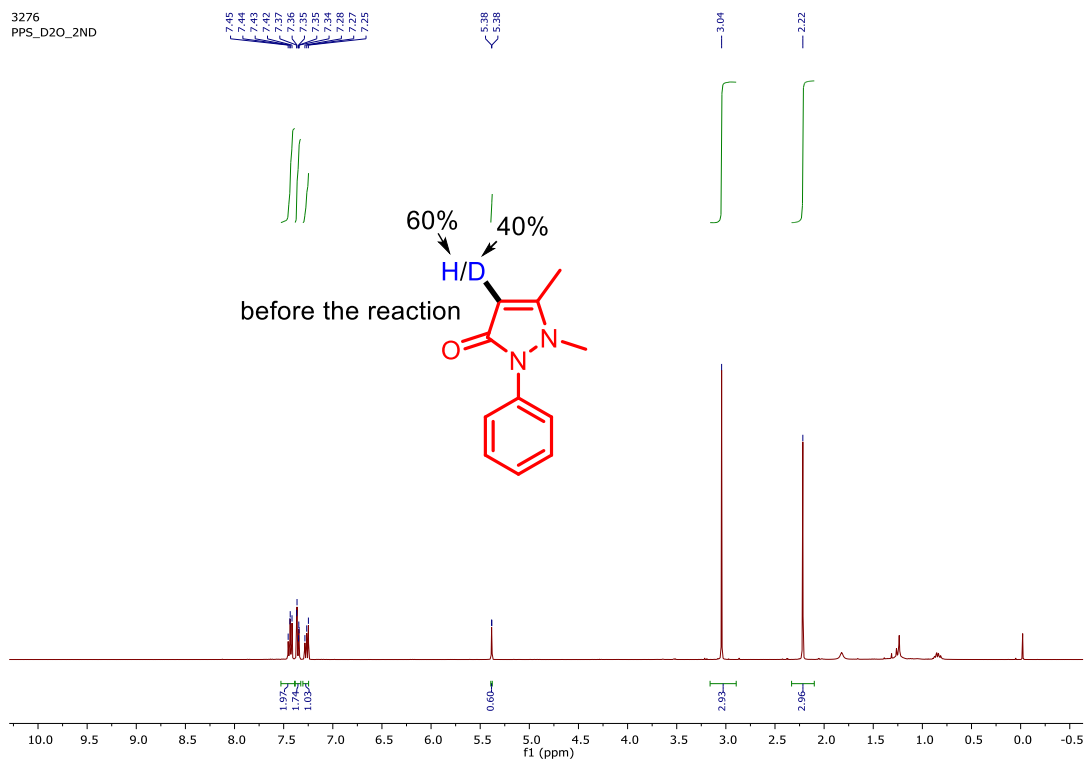

3236  
PPS\_D2O\_Pd

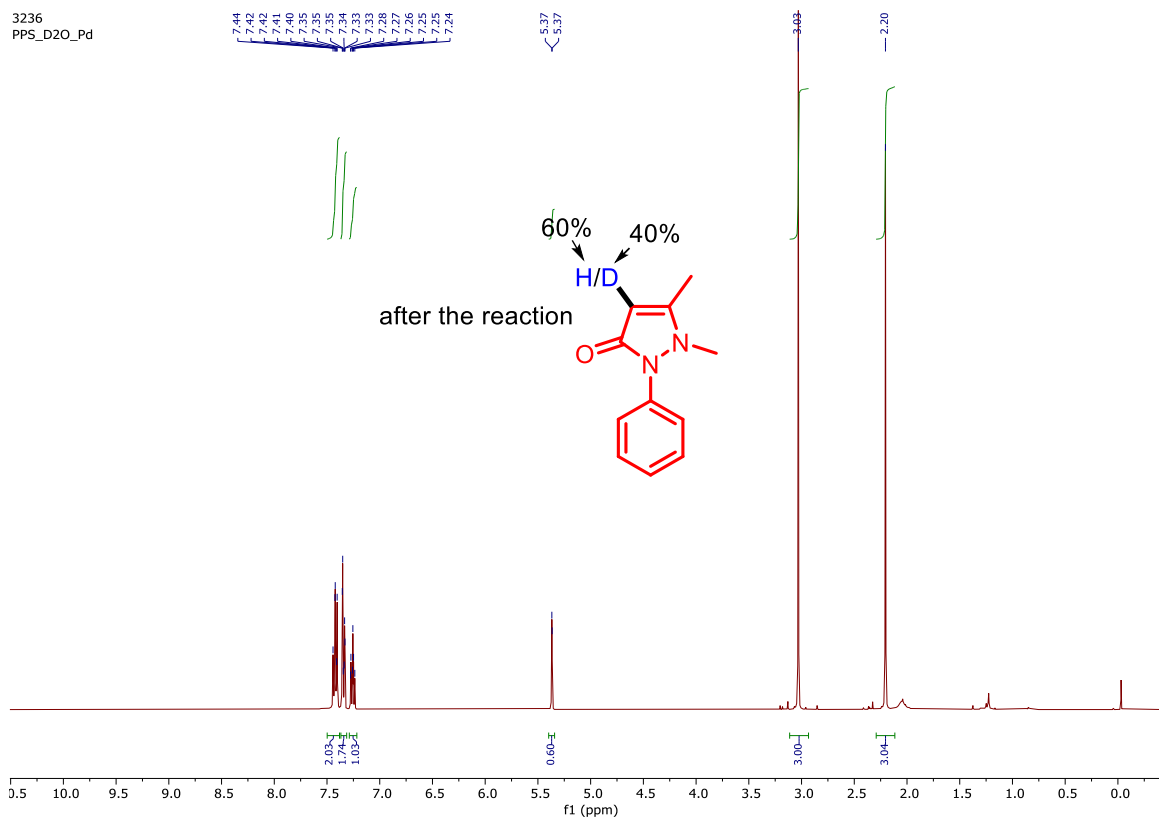

Supplement: d1ob00819f1.pdf [file d1ob00819f1.pdf]
